# Supplementary material for: Quantitative PCR assays to detect whales, rockfish, and common murre environmental DNA in marine water samples of the Northeastern Pacific
Source: PLoS One. 2020 Dec 2;15(12):e0242689. doi: 10.1371/journal.pone.0242689 (PMC7710076; doi:10.1371/journal.pone.0242689)
Supplement: S3 Table — All of the publicly available sequences in the NBCI nucleotide database that had 5 or fewer mismatches to the forward primer, reverse primer, and/or probe were compiled for the species, genus, and order for each target organism. For humpback whale, the infraorder (Cetacea) was used rather than the order (Artiodactyla) due to the excessively large number of sequences. (XLSX) [file pone.0242689.s003.xlsx]

## Sheet: Overview
Target Organism	Species		Genus		Order
	# sequences	Average # mismatch in F/P/R	# sequences	Average # mismatch in F/P/R	# sequences	Average # mismatch in F/P/R
Common Murre	46	0.15	30	1.4	3593	2.8
Shortbelly Rockfish	15	0	6097	1.6	3121	4.3
Humpback Whale	2222	0.07	0	n/a	12182	1.6

## Sheet: Detailed Analysis
Common Murre					Shortbelly Rockfish					Humpback Whale
Accession #	Primer/Probe	Mismatches	Taxonomic Level		Accession #	Primer/Probe	Mismatches	Taxonomic Level		Accession #	Primer/Probe	Mismatches	Taxonomic Level
AB843267	murre_R138	0	species		FJ165260	rockfish_P294	0	species		AP006467	humpback_P362	0	species
AB843267	murre_P34	0	species		FJ165260	rockfish_F169	0	species		AP006467	humpback_F287	0	species
AY666378	murre_R138	0	species		FJ165260	rockfish_R344	0	species		AP006467	humpback_R437	0	species
DQ433250	murre_F9	1	species		JQ354411	rockfish_P294	0	species		AY791294	humpback_P362	0	species
DQ433250	murre_R138	0	species		JQ354411	rockfish_F169	0	species		AY791294	humpback_F287	0	species
DQ433250	murre_P34	0	species		JQ354411	rockfish_R344	0	species		AY791295	humpback_P362	0	species
DQ434794	murre_R138	0	species		KF930412	rockfish_P294	0	species		AY791295	humpback_F287	0	species
DQ434794	murre_F9	0	species		KF930412	rockfish_F169	0	species		AY791296	humpback_P362	0	species
DQ434794	murre_P34	0	species		KF930412	rockfish_R344	0	species		AY791296	humpback_F287	0	species
DQ434795	murre_P34	0	species		KF930413	rockfish_P294	0	species		AY791297	humpback_P362	0	species
DQ434795	murre_R138	0	species		KF930413	rockfish_F169	0	species		AY791297	humpback_F287	0	species
DQ434795	murre_F9	1	species		KF930413	rockfish_R344	0	species		AY791298	humpback_P362	0	species
EF380334	murre_R138	0	species		KY570407	rockfish_P294	0	species		AY791298	humpback_F287	0	species
EF380334	murre_F9	1	species		KY570407	rockfish_R344	0	species		AY791299	humpback_P362	0	species
EF380334	murre_P34	0	species		KY570407	rockfish_F169	0	species		AY791299	humpback_F287	0	species
EF380335	murre_R138	0	species		EU752186	rockfish_P294	4	genus		AY791300	humpback_P362	0	species
EF380335	murre_F9	2	species		EU752186	rockfish_F169	0	genus		AY791300	humpback_F287	0	species
EF380335	murre_P34	1	species		EU752186	rockfish_R344	1	genus		AY791301	humpback_P362	0	species
EU525588	murre_R138	0	species		EU752187	rockfish_P294	3	genus		AY791301	humpback_F287	0	species
EU525589	murre_R138	0	species		EU752187	rockfish_F169	0	genus		AY791302	humpback_P362	0	species
EU525589	murre_F9	0	species		EU752187	rockfish_R344	1	genus		AY791302	humpback_F287	0	species
EU525589	murre_P34	0	species		EU752188	rockfish_P294	3	genus		AY791303	humpback_P362	0	species
EU525590	murre_F9	0	species		EU752188	rockfish_R344	1	genus		AY791303	humpback_F287	0	species
EU525590	murre_R138	0	species		EU752188	rockfish_F169	0	genus		AY791304	humpback_P362	0	species
EU525590	murre_P34	0	species		EU752189	rockfish_P294	3	genus		AY791304	humpback_F287	0	species
GU571680	murre_P34	0	species		EU752189	rockfish_F169	0	genus		AY791305	humpback_P362	0	species
GU571680	murre_R138	0	species		EU752189	rockfish_R344	1	genus		AY791305	humpback_F287	0	species
GU571680	murre_F9	0	species		FJ158547	rockfish_P294	3	genus		AY791306	humpback_P362	0	species
GU571681	murre_R138	0	species		FJ158547	rockfish_R344	1	genus		AY791306	humpback_F287	0	species
GU571681	murre_P34	0	species		FJ158547	rockfish_F169	0	genus		AY791307	humpback_P362	0	species
GU571681	murre_F9	1	species		FJ165135	rockfish_P294	4	genus		AY791307	humpback_F287	0	species
GU572157	murre_P34	0	species		FJ165135	rockfish_F169	0	genus		AY791308	humpback_P362	0	species
GU572157	murre_R138	0	species		FJ165135	rockfish_R344	1	genus		AY791308	humpback_F287	0	species
GU572157	murre_F9	0	species		FJ165136	rockfish_P294	4	genus		AY791309	humpback_P362	0	species
GU572158	murre_P34	0	species		FJ165136	rockfish_F169	0	genus		AY791309	humpback_F287	0	species
GU572158	murre_R138	0	species		FJ165136	rockfish_R344	1	genus		AY791310	humpback_P362	0	species
GU572158	murre_F9	0	species		FJ165137	rockfish_P294	4	genus		AY791310	humpback_F287	0	species
KF946927	murre_R138	0	species		FJ165137	rockfish_F169	0	genus		AY791311	humpback_P362	0	species
KF946927	murre_F9	0	species		FJ165137	rockfish_R344	1	genus		AY791311	humpback_F287	0	species
KF946927	murre_P34	0	species		FJ165138	rockfish_P294	4	genus		AY791312	humpback_P362	0	species
KF946928	murre_R138	0	species		FJ165138	rockfish_F169	0	genus		AY791312	humpback_F287	0	species
KF946928	murre_F9	0	species		FJ165138	rockfish_R344	1	genus		AY791313	humpback_P362	0	species
KF946928	murre_P34	0	species		FJ165139	rockfish_F169	0	genus		AY791313	humpback_F287	0	species
KF946929	murre_R138	0	species		FJ165139	rockfish_P294	4	genus		AY791314	humpback_P362	0	species
KF946929	murre_F9	0	species		FJ165139	rockfish_R344	1	genus		AY791314	humpback_F287	0	species
KF946929	murre_P34	0	species		FJ165140	rockfish_P294	4	genus		AY791315	humpback_P362	0	species
AY666277	murre_F9	1	genus		FJ165140	rockfish_F169	0	genus		AY791315	humpback_F287	0	species
AY666277	murre_R138	1	genus		FJ165140	rockfish_R344	1	genus		AY791316	humpback_P362	0	species
AY666277	murre_P34	2	genus		FJ165141	rockfish_P294	4	genus		AY791316	humpback_F287	0	species
DQ434214	murre_R138	1	genus		FJ165141	rockfish_F169	0	genus		AY791317	humpback_P362	0	species
DQ434214	murre_F9	1	genus		FJ165141	rockfish_R344	1	genus		AY791317	humpback_F287	0	species
DQ434214	murre_P34	3	genus		FJ165142	rockfish_P294	4	genus		AY791318	humpback_P362	0	species
DQ434215	murre_R138	1	genus		FJ165142	rockfish_F169	0	genus		AY791318	humpback_F287	0	species
DQ434215	murre_F9	1	genus		FJ165142	rockfish_R344	1	genus		AY791319	humpback_P362	0	species
DQ434215	murre_P34	2	genus		FJ165143	rockfish_P294	4	genus		AY791319	humpback_F287	0	species
EF380336	murre_R138	1	genus		FJ165143	rockfish_F169	0	genus		AY791320	humpback_P362	0	species
EF380336	murre_F9	2	genus		FJ165143	rockfish_R344	1	genus		AY791320	humpback_F287	0	species
EF380336	murre_P34	1	genus		FJ165144	rockfish_P294	4	genus		AY791321	humpback_P362	0	species
EU525591	murre_P34	2	genus		FJ165144	rockfish_F169	0	genus		AY791321	humpback_F287	0	species
EU525591	murre_R138	1	genus		FJ165144	rockfish_R344	1	genus		AY791322	humpback_P362	0	species
EU525591	murre_F9	1	genus		FJ165145	rockfish_P294	4	genus		AY791322	humpback_F287	0	species
EU525592	murre_F9	1	genus		FJ165145	rockfish_F169	0	genus		AY791323	humpback_P362	0	species
EU525592	murre_R138	1	genus		FJ165145	rockfish_R344	1	genus		AY791323	humpback_F287	0	species
EU525592	murre_P34	2	genus		FJ165146	rockfish_P294	4	genus		AY791324	humpback_P362	0	species
GQ482900	murre_F9	1	genus		FJ165146	rockfish_F169	0	genus		AY791324	humpback_F287	0	species
GQ482900	murre_R138	1	genus		FJ165146	rockfish_R344	1	genus		AY791325	humpback_P362	0	species
GQ482900	murre_P34	2	genus		FJ165147	rockfish_P294	4	genus		AY791325	humpback_F287	0	species
GU571682	murre_P34	2	genus		FJ165147	rockfish_F169	0	genus		AY791326	humpback_P362	0	species
GU571682	murre_R138	1	genus		FJ165147	rockfish_R344	1	genus		AY791326	humpback_F287	0	species
GU571682	murre_F9	1	genus		FJ165148	rockfish_P294	4	genus		AY791327	humpback_P362	0	species
GU571683	murre_P34	2	genus		FJ165148	rockfish_F169	0	genus		AY791327	humpback_F287	0	species
GU571683	murre_F9	1	genus		FJ165148	rockfish_R344	1	genus		AY791328	humpback_P362	0	species
GU571683	murre_R138	1	genus		FJ165149	rockfish_P294	4	genus		AY791328	humpback_F287	0	species
GU571684	murre_R138	2	genus		FJ165149	rockfish_F169	0	genus		AY791329	humpback_P362	0	species
GU571684	murre_P34	2	genus		FJ165149	rockfish_R344	1	genus		AY791329	humpback_F287	0	species
GU571684	murre_F9	1	genus		FJ165150	rockfish_P294	4	genus		AY791330	humpback_P362	0	species
AB842515	murre_P34	4	order		FJ165150	rockfish_F169	0	genus		AY791330	humpback_F287	0	species
AB842515	murre_R138	5	order		FJ165150	rockfish_R344	1	genus		AY791331	humpback_P362	0	species
AB842516	murre_P34	4	order		FJ165151	rockfish_P294	3	genus		AY791331	humpback_F287	0	species
AB842516	murre_R138	5	order		FJ165151	rockfish_F169	0	genus		AY791332	humpback_P362	0	species
AB842517	murre_P34	4	order		FJ165151	rockfish_R344	1	genus		AY791332	humpback_F287	0	species
AB842517	murre_R138	5	order		FJ165152	rockfish_P294	3	genus		AY791333	humpback_P362	0	species
AB843335	murre_P34	4	order		FJ165152	rockfish_F169	0	genus		AY791333	humpback_F287	0	species
AB843335	murre_R138	5	order		FJ165152	rockfish_R344	1	genus		AY791334	humpback_P362	0	species
AY666177	murre_P34	5	order		FJ165153	rockfish_P294	3	genus		AY791334	humpback_F287	0	species
AY666177	murre_F9	2	order		FJ165153	rockfish_F169	0	genus		AY791335	humpback_P362	0	species
AY666177	murre_R138	3	order		FJ165153	rockfish_R344	1	genus		AY791335	humpback_F287	0	species
AY666181	murre_P34	5	order		FJ165154	rockfish_P294	3	genus		AY791336	humpback_P362	0	species
AY666181	murre_R138	3	order		FJ165154	rockfish_F169	0	genus		AY791336	humpback_F287	0	species
AY666181	murre_F9	3	order		FJ165154	rockfish_R344	1	genus		AY791337	humpback_P362	0	species
AY666212	murre_P34	3	order		FJ165155	rockfish_P294	3	genus		AY791337	humpback_F287	0	species
AY666212	murre_F9	2	order		FJ165155	rockfish_F169	0	genus		AY791338	humpback_P362	0	species
AY666212	murre_R138	3	order		FJ165155	rockfish_R344	1	genus		AY791338	humpback_F287	0	species
AY666223	murre_P34	5	order		FJ165156	rockfish_P294	3	genus		AY791339	humpback_P362	0	species
AY666223	murre_F9	2	order		FJ165156	rockfish_F169	0	genus		AY791339	humpback_F287	0	species
AY666223	murre_R138	3	order		FJ165156	rockfish_R344	1	genus		AY791340	humpback_P362	0	species
AY666260	murre_P34	5	order		FJ165157	rockfish_P294	3	genus		AY791340	humpback_F287	0	species
AY666260	murre_F9	4	order		FJ165157	rockfish_F169	0	genus		AY791341	humpback_P362	0	species
AY666260	murre_R138	1	order		FJ165157	rockfish_R344	1	genus		AY791341	humpback_F287	0	species
AY666270	murre_P34	4	order		FJ165158	rockfish_P294	3	genus		AY791342	humpback_P362	0	species
AY666270	murre_F9	1	order		FJ165158	rockfish_F169	0	genus		AY791342	humpback_F287	0	species
AY666270	murre_R138	4	order		FJ165158	rockfish_R344	1	genus		AY791343	humpback_P362	0	species
AY666322	murre_P34	2	order		FJ165159	rockfish_P294	3	genus		AY791343	humpback_F287	0	species
AY666322	murre_F9	3	order		FJ165159	rockfish_F169	0	genus		AY791344	humpback_P362	0	species
AY666322	murre_R138	2	order		FJ165159	rockfish_R344	1	genus		AY791344	humpback_F287	0	species
AY666330	murre_P34	4	order		FJ165160	rockfish_P294	3	genus		AY791345	humpback_P362	0	species
AY666330	murre_F9	1	order		FJ165160	rockfish_F169	0	genus		AY791345	humpback_F287	0	species
AY666330	murre_R138	4	order		FJ165160	rockfish_R344	1	genus		AY791346	humpback_P362	0	species
AY666339	murre_P34	5	order		FJ165161	rockfish_P294	3	genus		AY791346	humpback_F287	0	species
AY666339	murre_F9	0	order		FJ165161	rockfish_F169	0	genus		AY791347	humpback_P362	0	species
AY666339	murre_R138	3	order		FJ165161	rockfish_R344	1	genus		AY791347	humpback_F287	0	species
AY666399	murre_P34	2	order		FJ165162	rockfish_P294	3	genus		AY791348	humpback_P362	0	species
AY666399	murre_R138	2	order		FJ165162	rockfish_F169	0	genus		AY791348	humpback_F287	0	species
AY666401	murre_P34	3	order		FJ165162	rockfish_R344	1	genus		DQ145070	humpback_F287	0	species
AY666401	murre_R138	2	order		FJ165163	rockfish_P294	3	genus		DQ145070	humpback_P362	0	species
AY666407	murre_P34	4	order		FJ165163	rockfish_F169	0	genus		DQ145071	humpback_P362	0	species
AY666407	murre_R138	2	order		FJ165163	rockfish_R344	1	genus		DQ145071	humpback_F287	0	species
AY666559	murre_P34	5	order		FJ165164	rockfish_P294	3	genus		DQ145072	humpback_P362	0	species
AY666559	murre_F9	3	order		FJ165164	rockfish_R344	1	genus		DQ145072	humpback_F287	0	species
AY666559	murre_R138	1	order		FJ165164	rockfish_F169	0	genus		DQ145073	humpback_F287	0	species
AY666561	murre_P34	5	order		FJ165165	rockfish_P294	3	genus		DQ145074	humpback_F287	0	species
AY666561	murre_R138	1	order		FJ165165	rockfish_R344	1	genus		DQ145074	humpback_P362	0	species
DQ432696	murre_P34	4	order		FJ165165	rockfish_F169	0	genus		DQ145075	humpback_F287	0	species
DQ432696	murre_F9	1	order		FJ165166	rockfish_P294	3	genus		DQ145075	humpback_P362	0	species
DQ432696	murre_R138	4	order		FJ165166	rockfish_F169	0	genus		DQ145076	humpback_F287	0	species
DQ432699	murre_P34	5	order		FJ165166	rockfish_R344	1	genus		DQ145077	humpback_F287	0	species
DQ432699	murre_F9	2	order		FJ165167	rockfish_P294	3	genus		DQ145077	humpback_P362	1	species
DQ432699	murre_R138	3	order		FJ165167	rockfish_F169	0	genus		DQ145078	humpback_F287	0	species
DQ432749	murre_P34	5	order		FJ165167	rockfish_R344	1	genus		DQ145078	humpback_P362	0	species
DQ432749	murre_R138	1	order		FJ165168	rockfish_R344	1	genus		DQ145079	humpback_F287	0	species
DQ433292	murre_P34	4	order		FJ165168	rockfish_F169	0	genus		DQ145079	humpback_P362	0	species
DQ433292	murre_R138	2	order		FJ165168	rockfish_P294	3	genus		DQ145080	humpback_F287	0	species
DQ433292	murre_F9	2	order		FJ165169	rockfish_P294	3	genus		DQ145080	humpback_P362	0	species
DQ433293	murre_P34	4	order		FJ165169	rockfish_R344	1	genus		DQ145081	humpback_F287	0	species
DQ433293	murre_R138	2	order		FJ165169	rockfish_F169	0	genus		DQ145081	humpback_P362	0	species
DQ433293	murre_F9	2	order		FJ165170	rockfish_P294	4	genus		DQ145082	humpback_F287	0	species
DQ433294	murre_F9	5	order		FJ165170	rockfish_F169	0	genus		DQ145082	humpback_P362	0	species
DQ433294	murre_R138	5	order		FJ165170	rockfish_R344	2	genus		DQ145083	humpback_F287	1	species
DQ433294	murre_F9	5	order		FJ165171	rockfish_P294	4	genus		DQ145083	humpback_P362	0	species
DQ433295	murre_P34	2	order		FJ165171	rockfish_F169	0	genus		DQ145084	humpback_F287	1	species
DQ433295	murre_R138	2	order		FJ165171	rockfish_R344	2	genus		DQ145084	humpback_P362	0	species
DQ433295	murre_F9	3	order		FJ165172	rockfish_P294	4	genus		DQ145085	humpback_F287	0	species
DQ433312	murre_P34	3	order		FJ165172	rockfish_F169	0	genus		DQ145085	humpback_P362	0	species
DQ433312	murre_R138	2	order		FJ165172	rockfish_R344	2	genus		DQ145086	humpback_F287	0	species
DQ433312	murre_F9	1	order		FJ165173	rockfish_P294	3	genus		DQ145086	humpback_P362	0	species
DQ434245	murre_P34	5	order		FJ165173	rockfish_F169	0	genus		DQ145087	humpback_P362	0	species
DQ434245	murre_R138	4	order		FJ165173	rockfish_R344	1	genus		DQ145087	humpback_F287	0	species
DQ434245	murre_F9	4	order		FJ165174	rockfish_P294	3	genus		DQ145088	humpback_F287	0	species
DQ434246	murre_P34	5	order		FJ165174	rockfish_F169	0	genus		DQ145088	humpback_P362	1	species
DQ434246	murre_R138	4	order		FJ165174	rockfish_R344	1	genus		DQ145089	humpback_P362	1	species
DQ434246	murre_F9	2	order		FJ165175	rockfish_P294	3	genus		DQ145089	humpback_F287	0	species
DQ434247	murre_P34	4	order		FJ165175	rockfish_F169	0	genus		DQ145090	humpback_F287	0	species
DQ434247	murre_R138	4	order		FJ165175	rockfish_R344	1	genus		DQ145091	humpback_F287	0	species
DQ434247	murre_F9	1	order		FJ165176	rockfish_P294	3	genus		DQ145091	humpback_P362	0	species
DQ434258	murre_P34	4	order		FJ165176	rockfish_F169	0	genus		DQ145092	humpback_P362	0	species
DQ434258	murre_R138	2	order		FJ165176	rockfish_R344	1	genus		DQ145092	humpback_F287	1	species
DQ434258	murre_F9	2	order		FJ165177	rockfish_P294	3	genus		DQ145093	humpback_F287	1	species
DQ434259	murre_P34	4	order		FJ165177	rockfish_F169	0	genus		DQ145093	humpback_P362	0	species
DQ434259	murre_R138	2	order		FJ165177	rockfish_R344	1	genus		DQ145094	humpback_F287	0	species
DQ434259	murre_F9	3	order		FJ165178	rockfish_P294	3	genus		DQ145094	humpback_P362	0	species
EF380315	murre_P34	5	order		FJ165178	rockfish_F169	0	genus		DQ145095	humpback_F287	0	species
EF380315	murre_R138	3	order		FJ165178	rockfish_R344	1	genus		DQ145095	humpback_P362	0	species
EF380315	murre_F9	0	order		FJ165179	rockfish_P294	3	genus		DQ145096	humpback_F287	0	species
EF380316	murre_P34	5	order		FJ165179	rockfish_F169	0	genus		DQ145097	humpback_F287	0	species
EF380316	murre_R138	3	order		FJ165179	rockfish_R344	1	genus		DQ145097	humpback_P362	0	species
EF380316	murre_F9	1	order		FJ165180	rockfish_P294	3	genus		DQ145098	humpback_F287	0	species
EF380317	murre_P34	3	order		FJ165180	rockfish_F169	0	genus		DQ145098	humpback_P362	0	species
EF380317	murre_R138	3	order		FJ165180	rockfish_R344	1	genus		DQ145099	humpback_P362	1	species
EF380317	murre_F9	2	order		FJ165181	rockfish_P294	3	genus		DQ145099	humpback_F287	0	species
EF380318	murre_P34	4	order		FJ165181	rockfish_F169	0	genus		DQ768307	humpback_F287	0	species
EF380318	murre_R138	2	order		FJ165181	rockfish_R344	1	genus		DQ768307	humpback_P362	0	species
EF380318	murre_F9	2	order		FJ165182	rockfish_P294	3	genus		DQ768307	humpback_R437	0	species
EF380319	murre_P34	2	order		FJ165182	rockfish_R344	1	genus		DQ768308	humpback_F287	0	species
EF380319	murre_R138	2	order		FJ165182	rockfish_F169	0	genus		DQ768308	humpback_P362	1	species
EF380319	murre_F9	3	order		FJ165183	rockfish_P294	3	genus		DQ768308	humpback_R437	0	species
EF380320	murre_P34	2	order		FJ165183	rockfish_R344	1	genus		DQ768309	humpback_F287	0	species
EF380320	murre_R138	2	order		FJ165183	rockfish_F169	0	genus		DQ768309	humpback_P362	0	species
EF380320	murre_F9	3	order		FJ165184	rockfish_R344	1	genus		DQ768309	humpback_R437	0	species
EF515749	murre_P34	4	order		FJ165184	rockfish_F169	0	genus		DQ768310	humpback_R437	0	species
EF515749	murre_F9	1	order		FJ165184	rockfish_P294	3	genus		DQ768310	humpback_P362	0	species
EF515749	murre_R138	5	order		FJ165185	rockfish_P294	3	genus		DQ768310	humpback_F287	0	species
EU525282	murre_P34	4	order		FJ165185	rockfish_F169	0	genus		DQ768311	humpback_F287	0	species
EU525282	murre_R138	5	order		FJ165185	rockfish_R344	0	genus		DQ768311	humpback_P362	0	species
EU525282	murre_F9	1	order		FJ165186	rockfish_P294	3	genus		DQ768311	humpback_R437	0	species
EU525283	murre_P34	4	order		FJ165186	rockfish_F169	1	genus		DQ768312	humpback_R437	0	species
EU525283	murre_R138	5	order		FJ165186	rockfish_R344	0	genus		DQ768312	humpback_P362	0	species
EU525284	murre_P34	4	order		FJ165187	rockfish_P294	3	genus		DQ768312	humpback_F287	0	species
EU525284	murre_R138	5	order		FJ165187	rockfish_F169	0	genus		DQ768313	humpback_F287	0	species
EU525284	murre_F9	1	order		FJ165187	rockfish_R344	0	genus		DQ768313	humpback_P362	0	species
EU525285	murre_P34	4	order		FJ165188	rockfish_P294	3	genus		DQ768313	humpback_R437	0	species
EU525285	murre_R138	5	order		FJ165188	rockfish_F169	0	genus		DQ768314	humpback_F287	0	species
EU525286	murre_P34	4	order		FJ165188	rockfish_R344	0	genus		DQ768314	humpback_P362	1	species
EU525286	murre_R138	4	order		FJ165189	rockfish_P294	3	genus		DQ768314	humpback_R437	0	species
EU525286	murre_F9	1	order		FJ165189	rockfish_F169	1	genus		DQ768315	humpback_F287	1	species
EU525287	murre_P34	4	order		FJ165189	rockfish_R344	1	genus		DQ768315	humpback_P362	0	species
EU525287	murre_R138	4	order		FJ165190	rockfish_P294	3	genus		DQ768315	humpback_R437	0	species
EU525288	murre_P34	4	order		FJ165190	rockfish_F169	1	genus		DQ768316	humpback_F287	0	species
EU525288	murre_R138	4	order		FJ165190	rockfish_R344	1	genus		DQ768316	humpback_P362	0	species
EU525289	murre_R138	3	order		FJ165191	rockfish_P294	3	genus		DQ768316	humpback_R437	0	species
EU525290	murre_P34	5	order		FJ165191	rockfish_F169	1	genus		DQ768317	humpback_F287	0	species
EU525290	murre_R138	3	order		FJ165191	rockfish_R344	1	genus		DQ768317	humpback_P362	0	species
EU525290	murre_F9	0	order		FJ165192	rockfish_P294	3	genus		DQ768317	humpback_R437	0	species
EU525291	murre_R138	3	order		FJ165192	rockfish_F169	1	genus		DQ768318	humpback_R437	0	species
EU525294	murre_P34	3	order		FJ165192	rockfish_R344	1	genus		DQ768318	humpback_P362	0	species
EU525294	murre_F9	2	order		FJ165193	rockfish_P294	3	genus		DQ768318	humpback_F287	0	species
EU525294	murre_R138	3	order		FJ165193	rockfish_F169	1	genus		DQ768319	humpback_F287	1	species
EU525295	murre_P34	3	order		FJ165193	rockfish_R344	1	genus		DQ768319	humpback_P362	0	species
EU525295	murre_F9	2	order		FJ165194	rockfish_P294	3	genus		DQ768319	humpback_R437	0	species
EU525295	murre_R138	3	order		FJ165194	rockfish_F169	1	genus		DQ768320	humpback_F287	0	species
EU525296	murre_P34	4	order		FJ165194	rockfish_R344	1	genus		DQ768320	humpback_P362	0	species
EU525296	murre_F9	2	order		FJ165195	rockfish_P294	3	genus		DQ768320	humpback_R437	0	species
EU525296	murre_R138	3	order		FJ165195	rockfish_F169	0	genus		DQ768321	humpback_F287	0	species
GQ481284	murre_P34	4	order		FJ165195	rockfish_R344	2	genus		DQ768321	humpback_P362	1	species
GQ481284	murre_F9	1	order		FJ165196	rockfish_P294	3	genus		DQ768321	humpback_R437	0	species
GQ481284	murre_R138	5	order		FJ165196	rockfish_F169	0	genus		DQ768322	humpback_F287	0	species
GQ481285	murre_P34	4	order		FJ165196	rockfish_R344	2	genus		DQ768322	humpback_P362	0	species
GQ481285	murre_F9	1	order		FJ165197	rockfish_P294	3	genus		DQ768322	humpback_R437	0	species
GQ481285	murre_R138	5	order		FJ165197	rockfish_F169	0	genus		DQ768323	humpback_F287	0	species
GQ481286	murre_P34	4	order		FJ165197	rockfish_R344	1	genus		DQ768323	humpback_P362	0	species
GQ481286	murre_F9	1	order		FJ165198	rockfish_P294	3	genus		DQ768323	humpback_R437	0	species
GQ481286	murre_R138	5	order		FJ165198	rockfish_F169	0	genus		DQ768324	humpback_R437	0	species
GQ481287	murre_P34	4	order		FJ165198	rockfish_R344	1	genus		DQ768324	humpback_P362	0	species
GQ481287	murre_F9	1	order		FJ165199	rockfish_P294	4	genus		DQ768324	humpback_F287	0	species
GQ481287	murre_R138	5	order		FJ165199	rockfish_F169	0	genus		DQ768325	humpback_F287	0	species
GQ481288	murre_P34	4	order		FJ165199	rockfish_R344	1	genus		DQ768325	humpback_P362	0	species
GQ481288	murre_F9	1	order		FJ165200	rockfish_P294	4	genus		DQ768325	humpback_R437	0	species
GQ481288	murre_R138	5	order		FJ165200	rockfish_F169	0	genus		DQ768326	humpback_F287	0	species
GQ481375	murre_P34	5	order		FJ165200	rockfish_R344	1	genus		DQ768326	humpback_P362	0	species
GQ481375	murre_F9	3	order		FJ165201	rockfish_P294	4	genus		DQ768326	humpback_R437	0	species
GQ481375	murre_R138	1	order		FJ165201	rockfish_F169	0	genus		DQ768327	humpback_F287	0	species
GQ481376	murre_P34	5	order		FJ165201	rockfish_R344	1	genus		DQ768327	humpback_P362	0	species
GQ481376	murre_F9	3	order		FJ165202	rockfish_P294	4	genus		DQ768327	humpback_R437	0	species
GQ481376	murre_R138	1	order		FJ165202	rockfish_F169	0	genus		DQ768328	humpback_F287	0	species
GQ481377	murre_P34	5	order		FJ165202	rockfish_R344	1	genus		DQ768328	humpback_P362	1	species
GQ481377	murre_F9	3	order		FJ165203	rockfish_P294	4	genus		DQ768328	humpback_R437	0	species
GQ481377	murre_R138	1	order		FJ165203	rockfish_F169	0	genus		DQ768329	humpback_F287	1	species
GQ481378	murre_P34	5	order		FJ165203	rockfish_R344	1	genus		DQ768329	humpback_P362	0	species
GQ481378	murre_F9	3	order		FJ165204	rockfish_P294	4	genus		DQ768329	humpback_R437	0	species
GQ481378	murre_R138	1	order		FJ165204	rockfish_F169	0	genus		DQ768330	humpback_F287	0	species
GQ482913	murre_F9	4	order		FJ165204	rockfish_R344	1	genus		DQ768330	humpback_P362	0	species
GQ482913	murre_R138	3	order		FJ165205	rockfish_P294	5	genus		DQ768330	humpback_R437	0	species
GU571222	murre_P34	4	order		FJ165205	rockfish_F169	0	genus		DQ768331	humpback_F287	0	species
GU571222	murre_F9	1	order		FJ165205	rockfish_R344	1	genus		DQ768331	humpback_P362	0	species
GU571222	murre_R138	5	order		FJ165206	rockfish_P294	5	genus		DQ768331	humpback_R437	0	species
GU571223	murre_P34	4	order		FJ165206	rockfish_F169	0	genus		DQ768332	humpback_F287	0	species
GU571223	murre_R138	5	order		FJ165206	rockfish_R344	1	genus		DQ768332	humpback_P362	0	species
GU571223	murre_F9	1	order		FJ165207	rockfish_P294	5	genus		DQ768332	humpback_R437	0	species
GU571230	murre_P34	4	order		FJ165207	rockfish_F169	0	genus		DQ768333	humpback_F287	0	species
GU571230	murre_R138	2	order		FJ165207	rockfish_R344	1	genus		DQ768333	humpback_P362	0	species
GU571230	murre_F9	2	order		FJ165208	rockfish_P294	5	genus		DQ768333	humpback_R437	0	species
GU571231	murre_P34	4	order		FJ165208	rockfish_F169	0	genus		DQ768334	humpback_R437	0	species
GU571231	murre_F9	2	order		FJ165208	rockfish_R344	1	genus		DQ768334	humpback_P362	0	species
GU571231	murre_R138	2	order		FJ165209	rockfish_P294	5	genus		DQ768334	humpback_F287	0	species
GU571233	murre_P34	2	order		FJ165209	rockfish_F169	0	genus		DQ768335	humpback_F287	0	species
GU571233	murre_R138	2	order		FJ165209	rockfish_R344	1	genus		DQ768335	humpback_P362	1	species
GU571233	murre_F9	3	order		FJ165210	rockfish_P294	5	genus		DQ768335	humpback_R437	1	species
GU571234	murre_P34	2	order		FJ165210	rockfish_F169	0	genus		DQ768336	humpback_F287	0	species
GU571234	murre_R138	2	order		FJ165210	rockfish_R344	1	genus		DQ768336	humpback_P362	1	species
GU571234	murre_F9	3	order		FJ165211	rockfish_P294	5	genus		DQ768336	humpback_R437	0	species
GU571267	murre_P34	5	order		FJ165211	rockfish_F169	0	genus		DQ768337	humpback_F287	0	species
GU571267	murre_R138	1	order		FJ165211	rockfish_R344	1	genus		DQ768337	humpback_P362	1	species
GU571267	murre_F9	3	order		FJ165212	rockfish_P294	5	genus		DQ768337	humpback_R437	0	species
GU571268	murre_P34	5	order		FJ165212	rockfish_F169	0	genus		DQ768338	humpback_R437	0	species
GU571268	murre_R138	1	order		FJ165212	rockfish_R344	1	genus		DQ768338	humpback_P362	0	species
GU571268	murre_F9	3	order		FJ165213	rockfish_P294	5	genus		DQ768338	humpback_F287	0	species
GU571699	murre_P34	4	order		FJ165213	rockfish_F169	0	genus		DQ768339	humpback_F287	0	species
GU571699	murre_R138	5	order		FJ165213	rockfish_R344	1	genus		DQ768339	humpback_P362	0	species
GU571699	murre_F9	1	order		FJ165214	rockfish_P294	5	genus		DQ768339	humpback_R437	0	species
GU571700	murre_P34	4	order		FJ165214	rockfish_F169	0	genus		DQ768340	humpback_R437	0	species
GU571700	murre_R138	5	order		FJ165214	rockfish_R344	1	genus		DQ768340	humpback_P362	0	species
GU571700	murre_F9	1	order		FJ165215	rockfish_P294	5	genus		DQ768340	humpback_F287	0	species
GU571707	murre_P34	4	order		FJ165215	rockfish_F169	0	genus		DQ768341	humpback_R437	0	species
GU571707	murre_R138	2	order		FJ165215	rockfish_R344	1	genus		DQ768341	humpback_P362	0	species
GU571707	murre_F9	2	order		FJ165216	rockfish_P294	5	genus		DQ768341	humpback_F287	0	species
GU571708	murre_P34	4	order		FJ165216	rockfish_F169	0	genus		DQ768342	humpback_F287	0	species
GU571708	murre_R138	2	order		FJ165216	rockfish_R344	1	genus		DQ768342	humpback_P362	0	species
GU571708	murre_F9	2	order		FJ165217	rockfish_P294	5	genus		DQ768342	humpback_R437	0	species
GU571711	murre_P34	2	order		FJ165217	rockfish_F169	0	genus		DQ768343	humpback_F287	0	species
GU571711	murre_R138	2	order		FJ165217	rockfish_R344	1	genus		DQ768343	humpback_P362	0	species
GU571711	murre_F9	3	order		FJ165218	rockfish_P294	5	genus		DQ768343	humpback_R437	0	species
GU571712	murre_P34	2	order		FJ165218	rockfish_F169	0	genus		DQ768344	humpback_F287	0	species
GU571712	murre_R138	2	order		FJ165218	rockfish_R344	1	genus		DQ768344	humpback_P362	0	species
GU571712	murre_F9	3	order		FJ165219	rockfish_P294	5	genus		DQ768344	humpback_R437	0	species
GU571741	murre_P34	5	order		FJ165219	rockfish_F169	0	genus		DQ768345	humpback_F287	0	species
GU571741	murre_R138	1	order		FJ165219	rockfish_R344	1	genus		DQ768345	humpback_P362	0	species
GU571741	murre_F9	3	order		FJ165220	rockfish_P294	5	genus		DQ768345	humpback_R437	0	species
GU571742	murre_P34	5	order		FJ165220	rockfish_F169	0	genus		DQ768346	humpback_F287	0	species
GU571742	murre_R138	1	order		FJ165220	rockfish_R344	1	genus		DQ768346	humpback_P362	0	species
GU571742	murre_F9	3	order		FJ165221	rockfish_P294	5	genus		DQ768346	humpback_R437	0	species
HM033207	murre_P34	4	order		FJ165221	rockfish_F169	0	genus		DQ768347	humpback_F287	0	species
HM033207	murre_F9	1	order		FJ165221	rockfish_R344	1	genus		DQ768347	humpback_P362	0	species
HM033207	murre_R138	4	order		FJ165222	rockfish_P294	5	genus		DQ768347	humpback_R437	0	species
HM033208	murre_P34	4	order		FJ165222	rockfish_F169	0	genus		DQ768348	humpback_F287	0	species
HM033208	murre_F9	1	order		FJ165222	rockfish_R344	1	genus		DQ768348	humpback_P362	0	species
HM033208	murre_R138	4	order		FJ165223	rockfish_P294	5	genus		DQ768348	humpback_R437	0	species
JF498755	murre_P34	4	order		FJ165223	rockfish_F169	0	genus		DQ768349	humpback_F287	0	species
JF498755	murre_R138	5	order		FJ165223	rockfish_R344	1	genus		DQ768349	humpback_P362	0	species
JF499075	murre_P34	4	order		FJ165224	rockfish_P294	5	genus		DQ768349	humpback_R437	0	species
JF499075	murre_R138	5	order		FJ165224	rockfish_F169	0	genus		DQ768350	humpback_F287	0	species
JN801257	murre_P34	4	order		FJ165224	rockfish_R344	1	genus		DQ768350	humpback_P362	0	species
JN801257	murre_F9	1	order		FJ165225	rockfish_P294	5	genus		DQ768350	humpback_R437	0	species
JN801257	murre_R138	5	order		FJ165225	rockfish_F169	0	genus		DQ768351	humpback_F287	0	species
JN801258	murre_P34	5	order		FJ165225	rockfish_R344	1	genus		DQ768351	humpback_P362	0	species
JN801258	murre_F9	0	order		FJ165226	rockfish_P294	5	genus		DQ768351	humpback_R437	0	species
JN801258	murre_R138	4	order		FJ165226	rockfish_F169	0	genus		DQ768352	humpback_F287	0	species
JN801259	murre_P34	3	order		FJ165226	rockfish_R344	1	genus		DQ768352	humpback_P362	0	species
JN801259	murre_F9	2	order		FJ165227	rockfish_P294	5	genus		DQ768352	humpback_R437	0	species
JN801259	murre_R138	3	order		FJ165227	rockfish_F169	0	genus		DQ768353	humpback_F287	0	species
JN801262	murre_P34	5	order		FJ165227	rockfish_R344	1	genus		DQ768353	humpback_P362	0	species
JN801262	murre_F9	2	order		FJ165228	rockfish_P294	5	genus		DQ768353	humpback_R437	0	species
JN801262	murre_R138	2	order		FJ165228	rockfish_F169	0	genus		DQ768354	humpback_F287	0	species
JN801263	murre_P34	5	order		FJ165228	rockfish_R344	1	genus		DQ768354	humpback_P362	0	species
JN801263	murre_F9	2	order		FJ165229	rockfish_P294	5	genus		DQ768354	humpback_R437	0	species
JN801263	murre_R138	2	order		FJ165229	rockfish_F169	0	genus		DQ768355	humpback_F287	0	species
JQ174026	murre_P34	5	order		FJ165229	rockfish_R344	1	genus		DQ768355	humpback_P362	0	species
JQ174026	murre_F9	2	order		FJ165230	rockfish_P294	5	genus		DQ768355	humpback_R437	0	species
JQ174026	murre_R138	2	order		FJ165230	rockfish_F169	0	genus		DQ768356	humpback_F287	0	species
JQ174027	murre_P34	3	order		FJ165230	rockfish_R344	1	genus		DQ768356	humpback_P362	0	species
JQ174027	murre_F9	1	order		FJ165231	rockfish_P294	1	genus		DQ768356	humpback_R437	0	species
JQ174027	murre_R138	2	order		FJ165231	rockfish_F169	1	genus		DQ768357	humpback_F287	0	species
JQ174028	murre_P34	3	order		FJ165231	rockfish_R344	1	genus		DQ768357	humpback_P362	1	species
JQ174028	murre_F9	1	order		FJ165232	rockfish_P294	1	genus		DQ768357	humpback_R437	1	species
JQ174028	murre_R138	2	order		FJ165232	rockfish_F169	1	genus		DQ768358	humpback_F287	0	species
JQ174029	murre_P34	3	order		FJ165232	rockfish_R344	1	genus		DQ768358	humpback_P362	0	species
JQ174029	murre_F9	1	order		FJ165233	rockfish_P294	1	genus		DQ768358	humpback_R437	0	species
JQ174029	murre_R138	2	order		FJ165233	rockfish_F169	1	genus		DQ768359	humpback_F287	1	species
JQ174030	murre_P34	5	order		FJ165233	rockfish_R344	1	genus		DQ768359	humpback_P362	0	species
JQ174030	murre_F9	2	order		FJ165234	rockfish_P294	1	genus		DQ768359	humpback_R437	0	species
JQ174030	murre_R138	2	order		FJ165234	rockfish_F169	1	genus		DQ768360	humpback_F287	0	species
JQ174031	murre_P34	5	order		FJ165234	rockfish_R344	1	genus		DQ768360	humpback_P362	0	species
JQ174031	murre_F9	2	order		FJ165235	rockfish_P294	1	genus		DQ768360	humpback_R437	0	species
JQ174031	murre_R138	2	order		FJ165235	rockfish_F169	1	genus		DQ768361	humpback_F287	0	species
JQ174032	murre_P34	5	order		FJ165235	rockfish_R344	1	genus		DQ768361	humpback_P362	0	species
JQ174032	murre_F9	2	order		FJ165236	rockfish_P294	1	genus		DQ768361	humpback_R437	0	species
JQ174032	murre_R138	2	order		FJ165236	rockfish_F169	1	genus		DQ768362	humpback_F287	0	species
JX297481	murre_P34	3	order		FJ165236	rockfish_R344	1	genus		DQ768362	humpback_P362	0	species
JX297481	murre_F9	1	order		FJ165237	rockfish_P294	1	genus		DQ768362	humpback_R437	0	species
JX297481	murre_R138	2	order		FJ165237	rockfish_F169	1	genus		DQ768363	humpback_F287	0	species
KF009511	murre_P34	2	order		FJ165237	rockfish_R344	1	genus		DQ768363	humpback_P362	0	species
KF009511	murre_R138	2	order		FJ165238	rockfish_P294	1	genus		DQ768363	humpback_R437	0	species
KF009511	murre_F9	2	order		FJ165238	rockfish_F169	1	genus		DQ768364	humpback_F287	0	species
KF009512	murre_P34	5	order		FJ165238	rockfish_R344	1	genus		DQ768364	humpback_P362	0	species
KF009512	murre_R138	3	order		FJ165239	rockfish_P294	1	genus		DQ768364	humpback_R437	0	species
KF009513	murre_P34	5	order		FJ165239	rockfish_F169	1	genus		DQ768365	humpback_F287	0	species
KF009513	murre_R138	1	order		FJ165239	rockfish_R344	1	genus		DQ768365	humpback_P362	0	species
KF009513	murre_F9	3	order		FJ165240	rockfish_P294	1	genus		DQ768365	humpback_R437	0	species
KF009514	murre_P34	5	order		FJ165240	rockfish_F169	1	genus		DQ768366	humpback_F287	0	species
KF009514	murre_R138	1	order		FJ165240	rockfish_R344	1	genus		DQ768366	humpback_P362	0	species
KF009514	murre_F9	4	order		FJ165241	rockfish_P294	1	genus		DQ768366	humpback_R437	0	species
KF009515	murre_R138	2	order		FJ165241	rockfish_F169	1	genus		DQ768367	humpback_R437	0	species
KF009516	murre_P34	5	order		FJ165241	rockfish_R344	1	genus		DQ768367	humpback_P362	0	species
KF009516	murre_F9	2	order		FJ165242	rockfish_P294	1	genus		DQ768367	humpback_F287	0	species
KF009516	murre_R138	2	order		FJ165242	rockfish_F169	1	genus		DQ768368	humpback_F287	0	species
KF946587	murre_P34	2	order		FJ165242	rockfish_R344	1	genus		DQ768368	humpback_P362	0	species
KF946587	murre_R138	2	order		FJ165243	rockfish_P294	1	genus		DQ768368	humpback_R437	0	species
KF946587	murre_F9	3	order		FJ165243	rockfish_F169	1	genus		DQ768369	humpback_R437	0	species
KF946588	murre_P34	2	order		FJ165243	rockfish_R344	1	genus		DQ768369	humpback_P362	0	species
KF946588	murre_R138	2	order		FJ165244	rockfish_P294	1	genus		DQ768369	humpback_F287	1	species
KF946588	murre_F9	3	order		FJ165244	rockfish_F169	1	genus		DQ768370	humpback_F287	0	species
KF946589	murre_P34	2	order		FJ165244	rockfish_R344	1	genus		DQ768370	humpback_P362	0	species
KF946589	murre_R138	2	order		FJ165245	rockfish_P294	3	genus		DQ768370	humpback_R437	0	species
KF946589	murre_F9	3	order		FJ165245	rockfish_R344	1	genus		DQ768371	humpback_R437	0	species
KU373267	murre_P34	5	order		FJ165245	rockfish_F169	0	genus		DQ768371	humpback_P362	0	species
KU373267	murre_R138	1	order		FJ501250	rockfish_F169	0	genus		DQ768371	humpback_F287	0	species
KU373267	murre_F9	3	order		FJ501250	rockfish_P294	3	genus		DQ768372	humpback_F287	0	species
KU722399	murre_P34	5	order		FJ501250	rockfish_R344	2	genus		DQ768372	humpback_P362	0	species
KU722399	murre_R138	1	order		FJ501251	rockfish_R344	1	genus		DQ768372	humpback_R437	0	species
KU722399	murre_F9	3	order		FJ501251	rockfish_P294	3	genus		DQ768373	humpback_F287	0	species
KU722472	murre_P34	5	order		FJ501251	rockfish_F169	0	genus		DQ768373	humpback_P362	0	species
KU722472	murre_R138	1	order		GQ254301	rockfish_P294	3	genus		DQ768373	humpback_R437	0	species
KU722472	murre_F9	3	order		GQ254301	rockfish_F169	0	genus		DQ768374	humpback_F287	0	species
MF580220	murre_P34	4	order		GQ254301	rockfish_R344	1	genus		DQ768374	humpback_P362	0	species
MF580220	murre_F9	1	order		GQ254302	rockfish_P294	3	genus		DQ768374	humpback_R437	0	species
MF580220	murre_R138	5	order		GQ254302	rockfish_R344	1	genus		DQ768375	humpback_F287	0	species
MK262120	murre_P34	5	order		GQ254302	rockfish_F169	0	genus		DQ768375	humpback_P362	0	species
MK262120	murre_R138	1	order		GQ254303	rockfish_P294	3	genus		DQ768375	humpback_R437	0	species
MK262120	murre_F9	3	order		GQ254303	rockfish_R344	1	genus		DQ768376	humpback_F287	0	species
MK262126	murre_P34	4	order		GQ254303	rockfish_F169	0	genus		DQ768376	humpback_P362	0	species
MK262126	murre_R138	3	order		GQ254304	rockfish_P294	3	genus		DQ768376	humpback_R437	0	species
MK262126	murre_F9	1	order		GQ254304	rockfish_F169	0	genus		DQ768377	humpback_F287	0	species
MK262295	murre_P34	4	order		GQ254304	rockfish_R344	1	genus		DQ768377	humpback_P362	1	species
MK262295	murre_R138	3	order		GQ254305	rockfish_P294	3	genus		DQ768377	humpback_R437	0	species
MK262295	murre_F9	1	order		GQ254305	rockfish_F169	0	genus		DQ768378	humpback_F287	0	species
AB842590	murre_R138	3	order		GQ254305	rockfish_R344	1	genus		DQ768378	humpback_P362	0	species
AB842590	murre_P34	2	order		GQ254415	rockfish_R344	1	genus		DQ768378	humpback_R437	0	species
AB842619	murre_R138	1	order		GQ254415	rockfish_P294	1	genus		DQ768379	humpback_F287	0	species
AB842620	murre_R138	1	order		GQ355759	rockfish_P294	4	genus		DQ768379	humpback_P362	0	species
AB842620	murre_F9	4	order		GQ355759	rockfish_R344	1	genus		DQ768379	humpback_R437	0	species
AB842621	murre_F9	4	order		GQ355759	rockfish_F169	0	genus		DQ768380	humpback_R437	0	species
AB842621	murre_R138	1	order		GQ355762	rockfish_P294	3	genus		DQ768380	humpback_P362	0	species
AB842622	murre_R138	1	order		GQ355762	rockfish_R344	1	genus		DQ768380	humpback_F287	0	species
AB842622	murre_F9	4	order		GQ355762	rockfish_F169	0	genus		DQ768381	humpback_F287	0	species
AB842647	murre_R138	4	order		GQ355765	rockfish_R344	1	genus		DQ768381	humpback_P362	0	species
AB842647	murre_F9	1	order		GQ355765	rockfish_P294	3	genus		DQ768381	humpback_R437	0	species
AB842647	murre_P34	5	order		GQ355765	rockfish_F169	0	genus		DQ768382	humpback_F287	0	species
AB842648	murre_P34	5	order		GQ355768	rockfish_P294	3	genus		DQ768382	humpback_P362	0	species
AB842648	murre_R138	4	order		GQ355768	rockfish_F169	0	genus		DQ768382	humpback_R437	0	species
AB842786	murre_P34	5	order		GQ355768	rockfish_R344	1	genus		DQ768383	humpback_F287	0	species
AB842786	murre_R138	1	order		GQ355771	rockfish_P294	3	genus		DQ768383	humpback_P362	0	species
AB842786	murre_F9	1	order		GQ355771	rockfish_R344	1	genus		DQ768383	humpback_R437	1	species
AB842787	murre_R138	1	order		GQ355771	rockfish_F169	0	genus		DQ768384	humpback_F287	0	species
AB842787	murre_F9	1	order		GQ396752	rockfish_P294	3	genus		DQ768384	humpback_P362	0	species
AB842787	murre_P34	5	order		GQ396752	rockfish_F169	0	genus		DQ768384	humpback_R437	0	species
AB842788	murre_P34	5	order		GQ396752	rockfish_R344	1	genus		DQ768385	humpback_F287	0	species
AB842788	murre_R138	1	order		GQ396755	rockfish_P294	3	genus		DQ768385	humpback_P362	0	species
AB842788	murre_F9	1	order		GQ396755	rockfish_R344	1	genus		DQ768385	humpback_R437	0	species
AB842789	murre_F9	1	order		GQ396755	rockfish_F169	0	genus		DQ768386	humpback_R437	0	species
AB842789	murre_R138	1	order		GQ396756	rockfish_P294	3	genus		DQ768386	humpback_P362	0	species
AB842789	murre_P34	5	order		GQ396756	rockfish_F169	0	genus		DQ768386	humpback_F287	0	species
AB842790	murre_R138	1	order		GQ396756	rockfish_R344	1	genus		DQ768387	humpback_R437	0	species
AB842790	murre_F9	1	order		GQ396757	rockfish_P294	3	genus		DQ768387	humpback_P362	0	species
AB842790	murre_P34	5	order		GQ396757	rockfish_F169	0	genus		DQ768387	humpback_F287	1	species
AB842791	murre_R138	3	order		GQ396757	rockfish_R344	1	genus		DQ768388	humpback_F287	0	species
AB842791	murre_F9	2	order		GQ396758	rockfish_P294	3	genus		DQ768388	humpback_P362	0	species
AB842791	murre_P34	4	order		GQ396758	rockfish_F169	0	genus		DQ768388	humpback_R437	0	species
AB842792	murre_P34	4	order		GQ396758	rockfish_R344	1	genus		DQ768389	humpback_F287	0	species
AB842792	murre_R138	3	order		GQ396763	rockfish_P294	3	genus		DQ768389	humpback_P362	0	species
AB843374	murre_R138	3	order		GQ396763	rockfish_F169	0	genus		DQ768389	humpback_R437	0	species
AB843374	murre_F9	4	order		GQ396763	rockfish_R344	1	genus		DQ768390	humpback_F287	0	species
AB843374	murre_P34	2	order		GQ497753	rockfish_P294	3	genus		DQ768390	humpback_P362	0	species
AB843375	murre_R138	2	order		GQ497753	rockfish_R344	1	genus		DQ768390	humpback_R437	0	species
AB843375	murre_P34	2	order		GQ497753	rockfish_F169	0	genus		DQ768391	humpback_R437	0	species
AB843403	murre_P34	3	order		GQ501096	rockfish_P294	1	genus		DQ768391	humpback_P362	0	species
AB843403	murre_R138	1	order		GQ501096	rockfish_F169	2	genus		DQ768391	humpback_F287	0	species
AB843404	murre_R138	1	order		GQ501096	rockfish_R344	1	genus		DQ768392	humpback_F287	0	species
AB843404	murre_F9	4	order		GQ501097	rockfish_P294	3	genus		DQ768392	humpback_P362	1	species
AB843405	murre_R138	1	order		GQ501097	rockfish_R344	1	genus		DQ768392	humpback_R437	0	species
AB843406	murre_R138	1	order		GQ501097	rockfish_F169	0	genus		DQ768393	humpback_F287	0	species
AB843406	murre_F9	4	order		GQ501098	rockfish_R344	1	genus		DQ768393	humpback_P362	0	species
AB843416	murre_P34	5	order		GQ501098	rockfish_P294	3	genus		DQ768393	humpback_R437	0	species
AB843416	murre_R138	4	order		GQ501098	rockfish_F169	0	genus		DQ768394	humpback_F287	0	species
AB843416	murre_F9	1	order		GQ501100	rockfish_P294	3	genus		DQ768394	humpback_P362	0	species
AB843417	murre_R138	4	order		GQ501100	rockfish_R344	1	genus		DQ768394	humpback_R437	0	species
AB843417	murre_F9	1	order		GQ501100	rockfish_F169	0	genus		DQ768395	humpback_R437	0	species
AB843417	murre_P34	5	order		GQ501104	rockfish_R344	2	genus		DQ768395	humpback_P362	0	species
AB843418	murre_R138	4	order		GQ501104	rockfish_P294	3	genus		DQ768395	humpback_F287	0	species
AB843418	murre_F9	1	order		GQ501104	rockfish_F169	0	genus		DQ768396	humpback_F287	0	species
AB843418	murre_P34	5	order		HM107288	rockfish_R344	1	genus		DQ768396	humpback_P362	0	species
AB843419	murre_R138	4	order		HM107288	rockfish_P294	4	genus		DQ768396	humpback_R437	0	species
AB843419	murre_F9	1	order		HM107288	rockfish_F169	0	genus		DQ768397	humpback_F287	0	species
AB843419	murre_P34	2	order		HM107289	rockfish_F169	0	genus		DQ768397	humpback_P362	0	species
AB843420	murre_P34	2	order		HM107289	rockfish_P294	3	genus		DQ768397	humpback_R437	0	species
AB843420	murre_R138	4	order		HM107289	rockfish_R344	1	genus		DQ768398	humpback_F287	0	species
AB843420	murre_F9	1	order		HM107292	rockfish_P294	3	genus		DQ768398	humpback_P362	1	species
AB843514	murre_F9	1	order		HM107292	rockfish_R344	1	genus		DQ768398	humpback_R437	0	species
AB843514	murre_P34	5	order		HM107292	rockfish_F169	0	genus		DQ768399	humpback_F287	0	species
AB843514	murre_R138	1	order		HM107296	rockfish_F169	0	genus		DQ768399	humpback_P362	0	species
AB843515	murre_R138	1	order		HM107296	rockfish_P294	4	genus		DQ768399	humpback_R437	0	species
AB843515	murre_F9	1	order		HM107296	rockfish_R344	1	genus		DQ768400	humpback_F287	0	species
AB843515	murre_P34	5	order		HM107297	rockfish_R344	1	genus		DQ768400	humpback_P362	0	species
AB843529	murre_F9	3	order		HM107297	rockfish_P294	3	genus		DQ768400	humpback_R437	1	species
AB843529	murre_R138	3	order		HM107297	rockfish_F169	0	genus		DQ768401	humpback_R437	0	species
AB843529	murre_P34	4	order		HM107300	rockfish_F169	0	genus		DQ768401	humpback_P362	0	species
AY666172	murre_R138	2	order		HM107300	rockfish_P294	3	genus		DQ768401	humpback_F287	0	species
AY666172	murre_F9	1	order		HM107300	rockfish_R344	1	genus		DQ768402	humpback_P362	0	species
AY666173	murre_R138	2	order		HM107301	rockfish_R344	1	genus		DQ768402	humpback_F287	0	species
AY666173	murre_F9	1	order		HM107301	rockfish_P294	3	genus		DQ768402	humpback_R437	0	species
AY666175	murre_F9	1	order		HM107301	rockfish_F169	0	genus		DQ768403	humpback_F287	0	species
AY666175	murre_R138	3	order		HM107302	rockfish_F169	0	genus		DQ768403	humpback_P362	0	species
AY666218	murre_F9	1	order		HM107302	rockfish_P294	4	genus		DQ768403	humpback_R437	0	species
AY666218	murre_R138	3	order		HM107302	rockfish_R344	1	genus		DQ768404	humpback_F287	0	species
AY666219	murre_F9	1	order		HM107303	rockfish_R344	1	genus		DQ768404	humpback_P362	0	species
AY666219	murre_R138	3	order		HM107303	rockfish_P294	4	genus		DQ768404	humpback_R437	0	species
AY666222	murre_P34	3	order		HM107303	rockfish_F169	0	genus		DQ768405	humpback_F287	0	species
AY666222	murre_R138	1	order		HM107304	rockfish_R344	1	genus		DQ768405	humpback_P362	0	species
AY666222	murre_F9	2	order		HM107304	rockfish_P294	1	genus		DQ768405	humpback_R437	0	species
AY666224	murre_R138	1	order		HM107304	rockfish_F169	1	genus		DQ768406	humpback_F287	0	species
AY666224	murre_P34	3	order		HQ229642	rockfish_R344	1	genus		DQ768406	humpback_P362	0	species
AY666246	murre_P34	3	order		HQ229642	rockfish_P294	3	genus		DQ768406	humpback_R437	0	species
AY666246	murre_R138	2	order		HQ229642	rockfish_F169	0	genus		DQ768407	humpback_F287	0	species
AY666246	murre_F9	3	order		HQ229644	rockfish_R344	1	genus		DQ768407	humpback_P362	0	species
AY666249	murre_F9	3	order		HQ229644	rockfish_P294	3	genus		DQ768407	humpback_R437	0	species
AY666249	murre_R138	3	order		HQ229644	rockfish_F169	0	genus		DQ768408	humpback_F287	0	species
AY666249	murre_P34	4	order		HQ229645	rockfish_R344	1	genus		DQ768408	humpback_P362	1	species
AY666251	murre_F9	2	order		HQ229645	rockfish_P294	3	genus		DQ768408	humpback_R437	0	species
AY666251	murre_R138	4	order		HQ229645	rockfish_F169	0	genus		DQ768409	humpback_R437	0	species
AY666251	murre_P34	3	order		HQ229646	rockfish_R344	1	genus		DQ768409	humpback_P362	0	species
AY666253	murre_R138	4	order		HQ229646	rockfish_P294	3	genus		DQ768409	humpback_F287	0	species
AY666253	murre_F9	1	order		HQ229646	rockfish_F169	0	genus		DQ768410	humpback_P362	0	species
AY666259	murre_F9	3	order		HQ229647	rockfish_R344	1	genus		DQ768410	humpback_F287	0	species
AY666259	murre_R138	3	order		HQ229647	rockfish_P294	3	genus		DQ768411	humpback_F287	0	species
AY666259	murre_P34	4	order		HQ229647	rockfish_F169	0	genus		DQ768411	humpback_P362	0	species
AY666261	murre_P34	2	order		HQ231378	rockfish_R344	1	genus		DQ768411	humpback_R437	0	species
AY666261	murre_R138	1	order		HQ231378	rockfish_P294	3	genus		DQ768412	humpback_F287	0	species
AY666261	murre_F9	2	order		HQ231378	rockfish_F169	0	genus		DQ768412	humpback_P362	0	species
AY666264	murre_F9	2	order		HQ231389	rockfish_P294	3	genus		DQ768412	humpback_R437	0	species
AY666264	murre_R138	3	order		HQ231389	rockfish_R344	1	genus		DQ768413	humpback_F287	0	species
AY666264	murre_P34	4	order		HQ231389	rockfish_F169	0	genus		DQ768413	humpback_P362	1	species
AY666272	murre_R138	2	order		HQ231391	rockfish_R344	1	genus		DQ768413	humpback_R437	0	species
AY666272	murre_F9	3	order		HQ231391	rockfish_P294	3	genus		DQ768414	humpback_F287	0	species
AY666272	murre_P34	3	order		HQ231391	rockfish_F169	0	genus		DQ768414	humpback_P362	1	species
AY666273	murre_F9	1	order		HQ231393	rockfish_R344	1	genus		DQ768414	humpback_R437	0	species
AY666273	murre_R138	4	order		HQ231393	rockfish_P294	4	genus		DQ768415	humpback_F287	0	species
AY666275	murre_R138	2	order		HQ231393	rockfish_F169	0	genus		DQ768415	humpback_P362	0	species
AY666275	murre_F9	0	order		HQ712756	rockfish_P294	3	genus		DQ768415	humpback_R437	0	species
AY666275	murre_P34	3	order		HQ712756	rockfish_F169	0	genus		DQ768416	humpback_F287	0	species
AY666275	murre_F9	5	order		HQ712756	rockfish_R344	1	genus		DQ768416	humpback_P362	0	species
AY666283	murre_R138	2	order		HQ712757	rockfish_P294	3	genus		DQ768416	humpback_R437	0	species
AY666283	murre_F9	0	order		HQ712757	rockfish_F169	0	genus		DQ768417	humpback_F287	0	species
AY666283	murre_P34	3	order		HQ712757	rockfish_R344	1	genus		DQ768417	humpback_P362	0	species
AY666283	murre_F9	5	order		HQ945989	rockfish_P294	3	genus		DQ768417	humpback_R437	0	species
AY666286	murre_P34	4	order		HQ945989	rockfish_F169	0	genus		DQ768418	humpback_R437	0	species
AY666286	murre_R138	3	order		HQ945989	rockfish_R344	0	genus		DQ768418	humpback_P362	1	species
AY666286	murre_F9	2	order		JF494476	rockfish_P294	5	genus		DQ768418	humpback_F287	0	species
AY666292	murre_P34	3	order		JF494476	rockfish_R344	5	genus		DQ768419	humpback_F287	0	species
AY666292	murre_R138	5	order		JF494477	rockfish_P294	5	genus		DQ768419	humpback_P362	0	species
AY666304	murre_F9	1	order		JF494477	rockfish_R344	5	genus		DQ768419	humpback_R437	0	species
AY666304	murre_R138	5	order		JN571492	rockfish_P294	3	genus		DQ768420	humpback_F287	0	species
AY666304	murre_P34	3	order		JN571492	rockfish_R344	1	genus		DQ768420	humpback_P362	1	species
AY666305	murre_P34	4	order		JN571492	rockfish_F169	0	genus		DQ768420	humpback_R437	0	species
AY666305	murre_R138	1	order		JN571493	rockfish_R344	1	genus		DQ768421	humpback_R437	0	species
AY666305	murre_F9	3	order		JN571493	rockfish_F169	0	genus		DQ768421	humpback_P362	0	species
AY666340	murre_F9	3	order		JN571493	rockfish_P294	4	genus		DQ768421	humpback_F287	0	species
AY666340	murre_R138	1	order		JN571494	rockfish_P294	4	genus		GQ352996	humpback_P362	0	species
AY666343	murre_P34	4	order		JN571494	rockfish_R344	1	genus		GQ352996	humpback_F287	0	species
AY666343	murre_R138	1	order		JN571494	rockfish_F169	0	genus		GQ352996	humpback_R437	0	species
AY666343	murre_F9	2	order		JN571495	rockfish_P294	4	genus		GQ352997	humpback_P362	0	species
AY666344	murre_F9	1	order		JN571495	rockfish_R344	1	genus		GQ352997	humpback_F287	0	species
AY666344	murre_R138	1	order		JN571495	rockfish_F169	0	genus		GQ352997	humpback_R437	0	species
AY666344	murre_P34	5	order		JN571496	rockfish_P294	4	genus		GQ352998	humpback_P362	0	species
AY666355	murre_F9	2	order		JN571496	rockfish_R344	1	genus		GQ352998	humpback_F287	0	species
AY666355	murre_R138	0	order		JN571496	rockfish_F169	0	genus		GQ352998	humpback_R437	0	species
AY666355	murre_P34	5	order		JN571497	rockfish_P294	4	genus		GQ352999	humpback_P362	0	species
AY666365	murre_F9	3	order		JN571497	rockfish_F169	0	genus		GQ352999	humpback_F287	0	species
AY666365	murre_P34	5	order		JN571497	rockfish_R344	1	genus		GQ352999	humpback_R437	0	species
AY666365	murre_R138	1	order		JN571498	rockfish_P294	4	genus		GQ353000	humpback_P362	0	species
AY666371	murre_F9	1	order		JN571498	rockfish_R344	1	genus		GQ353000	humpback_F287	0	species
AY666371	murre_R138	2	order		JN571498	rockfish_F169	0	genus		GQ353000	humpback_R437	0	species
AY666371	murre_P34	3	order		JN571499	rockfish_P294	4	genus		GQ353001	humpback_P362	0	species
AY666373	murre_P34	5	order		JN571499	rockfish_R344	1	genus		GQ353001	humpback_F287	0	species
AY666373	murre_R138	0	order		JN571499	rockfish_F169	0	genus		GQ353001	humpback_R437	0	species
AY666373	murre_F9	3	order		JN571500	rockfish_P294	4	genus		GQ353002	humpback_P362	0	species
AY666377	murre_F9	1	order		JN571500	rockfish_R344	1	genus		GQ353002	humpback_F287	0	species
AY666377	murre_R138	1	order		JN571500	rockfish_F169	0	genus		GQ353002	humpback_R437	0	species
AY666377	murre_P34	5	order		JN571501	rockfish_P294	4	genus		GQ353003	humpback_P362	0	species
AY666380	murre_P34	3	order		JN571501	rockfish_R344	1	genus		GQ353003	humpback_F287	0	species
AY666380	murre_R138	4	order		JN571501	rockfish_F169	0	genus		GQ353003	humpback_R437	0	species
AY666380	murre_F9	0	order		JN571502	rockfish_P294	4	genus		GQ353004	humpback_P362	0	species
AY666381	murre_P34	3	order		JN571502	rockfish_R344	1	genus		GQ353004	humpback_F287	0	species
AY666381	murre_R138	4	order		JN571502	rockfish_F169	0	genus		GQ353004	humpback_R437	0	species
AY666381	murre_F9	0	order		JN571503	rockfish_P294	4	genus		GQ353005	humpback_P362	0	species
AY666412	murre_F9	1	order		JN571503	rockfish_R344	1	genus		GQ353005	humpback_F287	0	species
AY666412	murre_R138	1	order		JN571503	rockfish_F169	0	genus		GQ353005	humpback_R437	0	species
AY666412	murre_P34	5	order		JN571504	rockfish_P294	4	genus		GQ353006	humpback_P362	0	species
AY666415	murre_R138	2	order		JN571504	rockfish_R344	1	genus		GQ353006	humpback_F287	0	species
AY666415	murre_P34	3	order		JN571504	rockfish_F169	0	genus		GQ353006	humpback_R437	0	species
AY666435	murre_R138	4	order		JN571506	rockfish_P294	4	genus		GQ353007	humpback_P362	0	species
DQ385167	murre_R138	2	order		JN571506	rockfish_R344	1	genus		GQ353007	humpback_F287	0	species
DQ385167	murre_F9	1	order		JN571506	rockfish_F169	0	genus		GQ353007	humpback_R437	0	species
DQ385168	murre_P34	4	order		JN571507	rockfish_P294	4	genus		GQ353008	humpback_P362	0	species
DQ385168	murre_R138	4	order		JN571507	rockfish_F169	0	genus		GQ353008	humpback_F287	0	species
DQ385168	murre_F9	4	order		JN571507	rockfish_R344	1	genus		GQ353008	humpback_R437	0	species
DQ385170	murre_P34	5	order		JN571508	rockfish_P294	4	genus		GQ353009	humpback_P362	0	species
DQ385170	murre_R138	2	order		JN571508	rockfish_R344	1	genus		GQ353009	humpback_F287	0	species
DQ385170	murre_F9	3	order		JN571508	rockfish_F169	0	genus		GQ353009	humpback_R437	0	species
DQ385175	murre_P34	5	order		JN571509	rockfish_P294	4	genus		GQ353010	humpback_P362	0	species
DQ385175	murre_R138	0	order		JN571509	rockfish_R344	1	genus		GQ353010	humpback_F287	0	species
DQ385175	murre_F9	3	order		JN571509	rockfish_F169	0	genus		GQ353010	humpback_R437	0	species
DQ385176	murre_P34	4	order		JN571510	rockfish_P294	4	genus		GQ353011	humpback_P362	0	species
DQ385176	murre_R138	3	order		JN571510	rockfish_R344	1	genus		GQ353011	humpback_F287	0	species
DQ385176	murre_F9	2	order		JN571510	rockfish_F169	0	genus		GQ353011	humpback_R437	0	species
DQ385177	murre_P34	5	order		JN571511	rockfish_R344	1	genus		GQ353012	humpback_P362	0	species
DQ385177	murre_R138	1	order		JN571511	rockfish_F169	0	genus		GQ353012	humpback_F287	0	species
DQ385177	murre_F9	3	order		JN571511	rockfish_P294	4	genus		GQ353012	humpback_R437	0	species
DQ432766	murre_P34	3	order		JN571512	rockfish_P294	4	genus		GQ353013	humpback_P362	0	species
DQ432766	murre_F9	5	order		JN571512	rockfish_F169	0	genus		GQ353013	humpback_F287	0	species
DQ432766	murre_R138	2	order		JN571512	rockfish_R344	1	genus		GQ353013	humpback_R437	0	species
DQ432770	murre_P34	3	order		JN571513	rockfish_P294	4	genus		GQ353014	humpback_P362	0	species
DQ432770	murre_R138	1	order		JN571513	rockfish_R344	1	genus		GQ353014	humpback_F287	0	species
DQ432771	murre_P34	3	order		JN571513	rockfish_F169	0	genus		GQ353014	humpback_R437	0	species
DQ432771	murre_R138	1	order		JN571515	rockfish_P294	4	genus		GQ353015	humpback_P362	0	species
DQ432797	murre_F9	1	order		JN571515	rockfish_F169	0	genus		GQ353015	humpback_F287	0	species
DQ432797	murre_R138	1	order		JN571515	rockfish_R344	1	genus		GQ353015	humpback_R437	0	species
DQ432797	murre_P34	5	order		JN571516	rockfish_P294	4	genus		GQ353016	humpback_P362	0	species
DQ432798	murre_F9	1	order		JN571516	rockfish_F169	0	genus		GQ353016	humpback_F287	0	species
DQ432798	murre_R138	2	order		JN571516	rockfish_R344	1	genus		GQ353016	humpback_R437	0	species
DQ432798	murre_P34	3	order		JN571517	rockfish_P294	4	genus		GQ353017	humpback_P362	0	species
DQ432799	murre_R138	1	order		JN571517	rockfish_F169	0	genus		GQ353017	humpback_F287	0	species
DQ432799	murre_F9	2	order		JN571517	rockfish_R344	1	genus		GQ353017	humpback_R437	0	species
DQ432799	murre_P34	4	order		JN571518	rockfish_P294	4	genus		GQ353018	humpback_P362	0	species
DQ432800	murre_F9	2	order		JN571518	rockfish_R344	1	genus		GQ353018	humpback_F287	0	species
DQ432800	murre_R138	1	order		JN571518	rockfish_F169	0	genus		GQ353018	humpback_R437	0	species
DQ432800	murre_P34	4	order		JN582067	rockfish_P294	3	genus		GQ353019	humpback_P362	0	species
DQ432801	murre_F9	1	order		JN582067	rockfish_R344	2	genus		GQ353019	humpback_F287	0	species
DQ432801	murre_R138	2	order		JN582067	rockfish_F169	0	genus		GQ353019	humpback_R437	0	species
DQ432801	murre_P34	3	order		JN582070	rockfish_P294	3	genus		GQ353020	humpback_P362	0	species
DQ432802	murre_P34	2	order		JN582070	rockfish_R344	1	genus		GQ353020	humpback_F287	0	species
DQ432802	murre_R138	1	order		JN582070	rockfish_F169	0	genus		GQ353020	humpback_R437	0	species
DQ432803	murre_F9	2	order		JN582071	rockfish_R344	2	genus		GQ353021	humpback_P362	0	species
DQ432803	murre_R138	1	order		JN582071	rockfish_P294	3	genus		GQ353021	humpback_F287	0	species
DQ432803	murre_P34	2	order		JN582071	rockfish_F169	0	genus		GQ353021	humpback_R437	0	species
DQ432804	murre_R138	2	order		JN582073	rockfish_P294	3	genus		GQ353022	humpback_P362	0	species
DQ432804	murre_F9	3	order		JN582073	rockfish_R344	1	genus		GQ353022	humpback_F287	0	species
DQ432804	murre_P34	3	order		JN582073	rockfish_F169	0	genus		GQ353022	humpback_R437	0	species
DQ432805	murre_R138	1	order		JN582078	rockfish_P294	3	genus		GQ353023	humpback_P362	0	species
DQ432805	murre_F9	2	order		JN582078	rockfish_R344	1	genus		GQ353023	humpback_F287	0	species
DQ432805	murre_P34	3	order		JN582078	rockfish_F169	0	genus		GQ353023	humpback_R437	0	species
DQ432835	murre_F9	3	order		JN582153	rockfish_P294	4	genus		GQ353024	humpback_P362	0	species
DQ432835	murre_R138	2	order		JN582153	rockfish_F169	0	genus		GQ353024	humpback_F287	0	species
DQ432835	murre_P34	3	order		JN582153	rockfish_R344	1	genus		GQ353024	humpback_R437	0	species
DQ432842	murre_P34	3	order		JN582154	rockfish_P294	4	genus		GQ353025	humpback_P362	0	species
DQ432842	murre_R138	4	order		JN582154	rockfish_R344	1	genus		GQ353025	humpback_F287	0	species
DQ432843	murre_R138	3	order		JN582154	rockfish_F169	0	genus		GQ353025	humpback_R437	0	species
DQ432844	murre_F9	1	order		JN582155	rockfish_P294	4	genus		GQ353026	humpback_P362	0	species
DQ432844	murre_R138	3	order		JN582155	rockfish_R344	1	genus		GQ353026	humpback_F287	0	species
DQ432844	murre_P34	5	order		JN582155	rockfish_F169	0	genus		GQ353026	humpback_R437	0	species
DQ432845	murre_F9	1	order		JN582156	rockfish_P294	4	genus		GQ353027	humpback_P362	0	species
DQ432845	murre_R138	3	order		JN582156	rockfish_F169	0	genus		GQ353027	humpback_F287	0	species
DQ432845	murre_P34	4	order		JN582156	rockfish_R344	1	genus		GQ353027	humpback_R437	0	species
DQ432846	murre_F9	1	order		JN582157	rockfish_P294	4	genus		GQ353028	humpback_P362	0	species
DQ432846	murre_R138	4	order		JN582157	rockfish_R344	1	genus		GQ353028	humpback_F287	0	species
DQ432847	murre_R138	2	order		JN582157	rockfish_F169	0	genus		GQ353028	humpback_R437	0	species
DQ432848	murre_F9	1	order		JN582158	rockfish_P294	4	genus		GQ353029	humpback_P362	0	species
DQ432848	murre_R138	3	order		JN582158	rockfish_R344	1	genus		GQ353029	humpback_F287	0	species
DQ432929	murre_F9	3	order		JN582158	rockfish_F169	0	genus		GQ353029	humpback_R437	0	species
DQ432929	murre_R138	1	order		JN582159	rockfish_P294	4	genus		GQ353030	humpback_P362	0	species
DQ432929	murre_P34	5	order		JN582159	rockfish_R344	1	genus		GQ353030	humpback_F287	0	species
DQ432930	murre_R138	1	order		JN582159	rockfish_F169	0	genus		GQ353030	humpback_R437	0	species
DQ432934	murre_F9	1	order		JN582160	rockfish_P294	4	genus		GQ353031	humpback_P362	0	species
DQ432934	murre_R138	5	order		JN582160	rockfish_R344	1	genus		GQ353031	humpback_F287	0	species
DQ432934	murre_P34	3	order		JN582160	rockfish_F169	0	genus		GQ353031	humpback_R437	0	species
DQ432935	murre_R138	5	order		JN582161	rockfish_P294	4	genus		GQ353032	humpback_P362	0	species
DQ432935	murre_F9	1	order		JN582161	rockfish_R344	1	genus		GQ353032	humpback_F287	0	species
DQ432935	murre_P34	3	order		JN582161	rockfish_F169	0	genus		GQ353032	humpback_R437	0	species
DQ433202	murre_F9	2	order		JN582162	rockfish_P294	3	genus		GQ353033	humpback_P362	0	species
DQ433202	murre_R138	3	order		JN582162	rockfish_R344	1	genus		GQ353033	humpback_F287	0	species
DQ433202	murre_P34	4	order		JN582162	rockfish_F169	0	genus		GQ353033	humpback_R437	0	species
DQ433354	murre_R138	1	order		JN600316	rockfish_P294	3	genus		GQ353034	humpback_P362	0	species
DQ433354	murre_F9	3	order		JN600316	rockfish_F169	0	genus		GQ353034	humpback_F287	0	species
DQ433354	murre_P34	3	order		JN600316	rockfish_R344	1	genus		GQ353034	humpback_R437	0	species
DQ433355	murre_R138	1	order		JQ354335	rockfish_P294	4	genus		GQ353035	humpback_P362	0	species
DQ433355	murre_F9	3	order		JQ354335	rockfish_F169	0	genus		GQ353035	humpback_F287	0	species
DQ433355	murre_P34	3	order		JQ354335	rockfish_R344	1	genus		GQ353035	humpback_R437	0	species
DQ433356	murre_R138	1	order		JQ354336	rockfish_P294	4	genus		GQ353036	humpback_P362	0	species
DQ433356	murre_F9	3	order		JQ354336	rockfish_F169	0	genus		GQ353036	humpback_F287	0	species
DQ433356	murre_P34	3	order		JQ354336	rockfish_R344	1	genus		GQ353036	humpback_R437	0	species
DQ433357	murre_R138	1	order		JQ354337	rockfish_P294	3	genus		GQ353037	humpback_P362	0	species
DQ433357	murre_F9	3	order		JQ354337	rockfish_F169	0	genus		GQ353037	humpback_F287	0	species
DQ433357	murre_P34	3	order		JQ354337	rockfish_R344	1	genus		GQ353037	humpback_R437	0	species
DQ433358	murre_R138	1	order		JQ354338	rockfish_P294	3	genus		GQ353038	humpback_P362	0	species
DQ433358	murre_F9	3	order		JQ354338	rockfish_F169	0	genus		GQ353038	humpback_F287	0	species
DQ433358	murre_P34	3	order		JQ354338	rockfish_R344	1	genus		GQ353038	humpback_R437	0	species
DQ433359	murre_R138	1	order		JQ354339	rockfish_P294	3	genus		GQ353039	humpback_P362	0	species
DQ433360	murre_P34	3	order		JQ354339	rockfish_F169	0	genus		GQ353039	humpback_F287	0	species
DQ433360	murre_R138	1	order		JQ354339	rockfish_R344	1	genus		GQ353039	humpback_R437	0	species
DQ433360	murre_F9	1	order		JQ354340	rockfish_F169	0	genus		GQ353040	humpback_P362	0	species
DQ433361	murre_R138	1	order		JQ354340	rockfish_P294	3	genus		GQ353040	humpback_F287	0	species
DQ433361	murre_F9	1	order		JQ354340	rockfish_R344	1	genus		GQ353040	humpback_R437	0	species
DQ433361	murre_P34	3	order		JQ354341	rockfish_P294	3	genus		GQ353041	humpback_P362	0	species
DQ433412	murre_R138	1	order		JQ354341	rockfish_F169	0	genus		GQ353041	humpback_F287	0	species
DQ433412	murre_P34	5	order		JQ354341	rockfish_R344	1	genus		GQ353041	humpback_R437	0	species
DQ433412	murre_R138	5	order		JQ354342	rockfish_P294	3	genus		GQ353042	humpback_P362	0	species
DQ433413	murre_R138	2	order		JQ354342	rockfish_F169	0	genus		GQ353042	humpback_F287	0	species
DQ433413	murre_F9	1	order		JQ354342	rockfish_R344	1	genus		GQ353042	humpback_R437	0	species
DQ433413	murre_P34	3	order		JQ354343	rockfish_F169	0	genus		GQ353043	humpback_P362	0	species
DQ433414	murre_R138	2	order		JQ354343	rockfish_P294	4	genus		GQ353043	humpback_F287	0	species
DQ433414	murre_F9	1	order		JQ354343	rockfish_R344	1	genus		GQ353043	humpback_R437	0	species
DQ433414	murre_P34	3	order		JQ354344	rockfish_P294	4	genus		GQ353044	humpback_P362	0	species
DQ433467	murre_R138	1	order		JQ354344	rockfish_F169	0	genus		GQ353044	humpback_F287	0	species
DQ433467	murre_F9	2	order		JQ354344	rockfish_R344	1	genus		GQ353044	humpback_R437	0	species
DQ433467	murre_P34	3	order		JQ354345	rockfish_F169	0	genus		GQ353045	humpback_P362	0	species
DQ433468	murre_R138	1	order		JQ354345	rockfish_P294	4	genus		GQ353045	humpback_F287	0	species
DQ433468	murre_F9	2	order		JQ354345	rockfish_R344	1	genus		GQ353045	humpback_R437	0	species
DQ433468	murre_P34	3	order		JQ354346	rockfish_P294	4	genus		GQ353046	humpback_P362	0	species
DQ433469	murre_R138	2	order		JQ354346	rockfish_F169	0	genus		GQ353046	humpback_F287	0	species
DQ433470	murre_R138	2	order		JQ354346	rockfish_R344	1	genus		GQ353046	humpback_R437	0	species
DQ433470	murre_F9	3	order		JQ354347	rockfish_R344	1	genus		GQ353047	humpback_P362	0	species
DQ433470	murre_P34	3	order		JQ354347	rockfish_P294	4	genus		GQ353047	humpback_F287	0	species
DQ433471	murre_R138	2	order		JQ354347	rockfish_F169	0	genus		GQ353047	humpback_R437	0	species
DQ433471	murre_F9	3	order		JQ354348	rockfish_F169	0	genus		GQ353048	humpback_P362	0	species
DQ433471	murre_P34	3	order		JQ354348	rockfish_P294	4	genus		GQ353048	humpback_F287	0	species
DQ433472	murre_R138	1	order		JQ354348	rockfish_R344	2	genus		GQ353048	humpback_R437	0	species
DQ433473	murre_R138	1	order		JQ354349	rockfish_R344	2	genus		GQ353049	humpback_P362	0	species
DQ433474	murre_R138	1	order		JQ354349	rockfish_P294	4	genus		GQ353049	humpback_F287	0	species
DQ433474	murre_F9	4	order		JQ354349	rockfish_F169	0	genus		GQ353049	humpback_R437	0	species
DQ433475	murre_R138	1	order		JQ354350	rockfish_R344	2	genus		GQ353050	humpback_P362	0	species
DQ433475	murre_F9	4	order		JQ354350	rockfish_P294	4	genus		GQ353050	humpback_F287	0	species
DQ433488	murre_R138	4	order		JQ354350	rockfish_F169	0	genus		GQ353050	humpback_R437	0	species
DQ433488	murre_F9	1	order		JQ354351	rockfish_P294	4	genus		GQ353051	humpback_P362	0	species
DQ433489	murre_R138	4	order		JQ354351	rockfish_F169	0	genus		GQ353051	humpback_F287	0	species
DQ433489	murre_F9	1	order		JQ354351	rockfish_R344	2	genus		GQ353051	humpback_R437	0	species
DQ433490	murre_R138	4	order		JQ354352	rockfish_R344	2	genus		GQ353052	humpback_P362	0	species
DQ433490	murre_F9	1	order		JQ354352	rockfish_F169	0	genus		GQ353052	humpback_F287	0	species
DQ433491	murre_R138	4	order		JQ354352	rockfish_P294	4	genus		GQ353052	humpback_R437	0	species
DQ433491	murre_F9	1	order		JQ354353	rockfish_P294	3	genus		GQ353053	humpback_P362	0	species
DQ433492	murre_R138	1	order		JQ354353	rockfish_R344	1	genus		GQ353053	humpback_F287	0	species
DQ433492	murre_F9	2	order		JQ354353	rockfish_F169	0	genus		GQ353053	humpback_R437	0	species
DQ433493	murre_R138	4	order		JQ354354	rockfish_F169	0	genus		GQ353054	humpback_P362	0	species
DQ433493	murre_F9	1	order		JQ354354	rockfish_P294	3	genus		GQ353054	humpback_F287	0	species
DQ433494	murre_R138	4	order		JQ354354	rockfish_R344	1	genus		GQ353054	humpback_R437	0	species
DQ433494	murre_F9	1	order		JQ354355	rockfish_R344	1	genus		GQ353055	humpback_P362	0	species
DQ433495	murre_R138	4	order		JQ354355	rockfish_P294	3	genus		GQ353055	humpback_F287	0	species
DQ433495	murre_F9	1	order		JQ354355	rockfish_F169	1	genus		GQ353055	humpback_R437	0	species
DQ433499	murre_R138	4	order		JQ354356	rockfish_R344	1	genus		GQ353056	humpback_P362	0	species
DQ433499	murre_F9	2	order		JQ354356	rockfish_F169	1	genus		GQ353056	humpback_F287	0	species
DQ433499	murre_P34	3	order		JQ354356	rockfish_P294	3	genus		GQ353056	humpback_R437	0	species
DQ433642	murre_R138	1	order		JQ354357	rockfish_P294	3	genus		GQ353057	humpback_P362	0	species
DQ433642	murre_F9	3	order		JQ354357	rockfish_F169	0	genus		GQ353057	humpback_F287	0	species
DQ433642	murre_P34	5	order		JQ354357	rockfish_R344	1	genus		GQ353057	humpback_R437	0	species
DQ433643	murre_P34	5	order		JQ354358	rockfish_P294	3	genus		GQ353058	humpback_P362	0	species
DQ433643	murre_R138	1	order		JQ354358	rockfish_F169	0	genus		GQ353058	humpback_F287	0	species
DQ433643	murre_F9	4	order		JQ354358	rockfish_R344	1	genus		GQ353058	humpback_R437	0	species
DQ433644	murre_R138	1	order		JQ354359	rockfish_P294	3	genus		GQ353059	humpback_P362	0	species
DQ433644	murre_F9	1	order		JQ354359	rockfish_F169	0	genus		GQ353059	humpback_F287	0	species
DQ433644	murre_P34	5	order		JQ354359	rockfish_R344	1	genus		GQ353059	humpback_R437	0	species
DQ433653	murre_R138	5	order		JQ354360	rockfish_P294	3	genus		GQ353060	humpback_P362	0	species
DQ433653	murre_P34	5	order		JQ354360	rockfish_F169	0	genus		GQ353060	humpback_F287	0	species
DQ433653	murre_R138	5	order		JQ354360	rockfish_R344	1	genus		GQ353060	humpback_R437	0	species
DQ433653	murre_R138	5	order		JQ354361	rockfish_F169	0	genus		GQ353061	humpback_P362	0	species
DQ433653	murre_F9	5	order		JQ354361	rockfish_P294	3	genus		GQ353061	humpback_F287	0	species
DQ433653	murre_P34	5	order		JQ354361	rockfish_R344	1	genus		GQ353061	humpback_R437	0	species
DQ433653	murre_F9	5	order		JQ354362	rockfish_P294	4	genus		GQ353062	humpback_P362	0	species
DQ433653	murre_F9	5	order		JQ354362	rockfish_F169	0	genus		GQ353062	humpback_F287	0	species
DQ433653	murre_R138	5	order		JQ354362	rockfish_R344	1	genus		GQ353062	humpback_R437	0	species
DQ434149	murre_R138	3	order		JQ354363	rockfish_F169	0	genus		GQ353063	humpback_P362	0	species
DQ434149	murre_F9	2	order		JQ354363	rockfish_P294	3	genus		GQ353063	humpback_F287	0	species
DQ434149	murre_P34	4	order		JQ354363	rockfish_R344	1	genus		GQ353063	humpback_R437	0	species
DQ434166	murre_R138	1	order		JQ354364	rockfish_P294	3	genus		GQ353064	humpback_P362	0	species
DQ434166	murre_F9	3	order		JQ354364	rockfish_F169	0	genus		GQ353064	humpback_F287	0	species
DQ434166	murre_P34	4	order		JQ354364	rockfish_R344	1	genus		GQ353064	humpback_R437	0	species
DQ434167	murre_R138	1	order		JQ354365	rockfish_P294	4	genus		GQ353065	humpback_P362	0	species
DQ434167	murre_F9	3	order		JQ354365	rockfish_R344	1	genus		GQ353065	humpback_F287	0	species
DQ434167	murre_P34	4	order		JQ354365	rockfish_F169	0	genus		GQ353065	humpback_R437	0	species
DQ434596	murre_R138	1	order		JQ354366	rockfish_P294	4	genus		GQ353066	humpback_P362	0	species
DQ434596	murre_F9	3	order		JQ354366	rockfish_F169	0	genus		GQ353066	humpback_F287	0	species
DQ434596	murre_P34	5	order		JQ354366	rockfish_R344	1	genus		GQ353066	humpback_R437	0	species
DQ434597	murre_R138	1	order		JQ354367	rockfish_R344	2	genus		GQ353067	humpback_P362	0	species
DQ434597	murre_F9	3	order		JQ354367	rockfish_P294	3	genus		GQ353067	humpback_F287	0	species
DQ434597	murre_P34	5	order		JQ354367	rockfish_F169	0	genus		GQ353067	humpback_R437	0	species
DQ434599	murre_P34	4	order		JQ354368	rockfish_R344	1	genus		GQ353068	humpback_P362	0	species
DQ434599	murre_R138	5	order		JQ354368	rockfish_F169	0	genus		GQ353068	humpback_F287	0	species
DQ434599	murre_F9	2	order		JQ354368	rockfish_P294	5	genus		GQ353068	humpback_R437	0	species
EF380321	murre_R138	1	order		JQ354369	rockfish_P294	5	genus		GQ353069	humpback_P362	0	species
EF380321	murre_F9	3	order		JQ354369	rockfish_F169	0	genus		GQ353069	humpback_F287	0	species
EF380321	murre_P34	3	order		JQ354369	rockfish_R344	1	genus		GQ353069	humpback_R437	0	species
EF380322	murre_R138	1	order		JQ354370	rockfish_R344	1	genus		GQ353070	humpback_P362	0	species
EF380322	murre_F9	1	order		JQ354370	rockfish_P294	5	genus		GQ353070	humpback_F287	0	species
EF380322	murre_P34	3	order		JQ354370	rockfish_F169	0	genus		GQ353070	humpback_R437	0	species
EF380323	murre_R138	3	order		JQ354371	rockfish_P294	5	genus		GQ353071	humpback_P362	0	species
EF380323	murre_F9	4	order		JQ354371	rockfish_F169	0	genus		GQ353071	humpback_F287	0	species
EF380323	murre_P34	2	order		JQ354371	rockfish_R344	1	genus		GQ353071	humpback_R437	0	species
EF380324	murre_R138	1	order		JQ354372	rockfish_P294	5	genus		GQ353072	humpback_P362	0	species
EF380324	murre_F9	5	order		JQ354372	rockfish_F169	0	genus		GQ353072	humpback_F287	0	species
EF380324	murre_P34	3	order		JQ354372	rockfish_R344	1	genus		GQ353072	humpback_R437	0	species
EF380325	murre_R138	1	order		JQ354373	rockfish_P294	1	genus		GQ353073	humpback_P362	0	species
EF380325	murre_F9	3	order		JQ354373	rockfish_F169	1	genus		GQ353073	humpback_F287	0	species
EF380325	murre_P34	4	order		JQ354373	rockfish_R344	1	genus		GQ353073	humpback_R437	0	species
EF380326	murre_R138	1	order		JQ354374	rockfish_P294	1	genus		GQ353074	humpback_P362	0	species
EF380326	murre_F9	1	order		JQ354374	rockfish_F169	1	genus		GQ353074	humpback_F287	0	species
EF380326	murre_P34	2	order		JQ354374	rockfish_R344	1	genus		GQ353074	humpback_R437	0	species
EF380327	murre_R138	3	order		JQ354375	rockfish_P294	1	genus		GQ353075	humpback_P362	0	species
EF380327	murre_F9	1	order		JQ354375	rockfish_F169	1	genus		GQ353075	humpback_F287	0	species
EF380328	murre_R138	1	order		JQ354375	rockfish_R344	1	genus		GQ353075	humpback_R437	0	species
EF380328	murre_F9	3	order		JQ354376	rockfish_P294	1	genus		GQ353076	humpback_P362	0	species
EF380329	murre_R138	1	order		JQ354376	rockfish_F169	1	genus		GQ353076	humpback_F287	0	species
EF380329	murre_F9	1	order		JQ354376	rockfish_R344	1	genus		GQ353076	humpback_R437	0	species
EF380329	murre_P34	5	order		JQ354377	rockfish_P294	1	genus		GQ353077	humpback_P362	0	species
EF515752	murre_P34	5	order		JQ354377	rockfish_F169	1	genus		GQ353077	humpback_F287	0	species
EF515752	murre_F9	2	order		JQ354377	rockfish_R344	1	genus		GQ353077	humpback_R437	0	species
EF515752	murre_R138	3	order		JQ354378	rockfish_P294	1	genus		GQ353078	humpback_P362	0	species
EU525292	murre_R138	3	order		JQ354378	rockfish_R344	1	genus		GQ353078	humpback_F287	0	species
EU525293	murre_R138	3	order		JQ354378	rockfish_F169	1	genus		GQ353078	humpback_R437	0	species
EU525325	murre_P34	3	order		JQ354379	rockfish_P294	1	genus		GQ353079	humpback_P362	0	species
EU525325	murre_R138	1	order		JQ354379	rockfish_F169	1	genus		GQ353079	humpback_F287	0	species
EU525325	murre_F9	3	order		JQ354379	rockfish_R344	1	genus		GQ353079	humpback_R437	0	species
EU525326	murre_P34	3	order		JQ354380	rockfish_P294	1	genus		GQ353080	humpback_P362	0	species
EU525326	murre_R138	1	order		JQ354380	rockfish_F169	1	genus		GQ353080	humpback_F287	0	species
EU525327	murre_R138	1	order		JQ354380	rockfish_R344	1	genus		GQ353080	humpback_R437	0	species
EU525327	murre_P34	3	order		JQ354381	rockfish_P294	1	genus		GQ353081	humpback_P362	0	species
EU525328	murre_P34	3	order		JQ354381	rockfish_F169	1	genus		GQ353081	humpback_F287	0	species
EU525328	murre_R138	1	order		JQ354381	rockfish_R344	1	genus		GQ353081	humpback_R437	0	species
EU525328	murre_F9	1	order		JQ354382	rockfish_P294	1	genus		GQ353082	humpback_P362	0	species
EU525329	murre_R138	1	order		JQ354382	rockfish_F169	1	genus		GQ353082	humpback_F287	0	species
EU525329	murre_P34	3	order		JQ354382	rockfish_R344	1	genus		GQ353082	humpback_R437	0	species
EU525337	murre_R138	1	order		JQ354383	rockfish_R344	1	genus		GQ353083	humpback_P362	0	species
EU525337	murre_F9	4	order		JQ354383	rockfish_P294	4	genus		GQ353083	humpback_F287	0	species
EU525338	murre_R138	1	order		JQ354383	rockfish_F169	1	genus		GQ353083	humpback_R437	0	species
EU525339	murre_R138	3	order		JQ354384	rockfish_P294	4	genus		GQ353084	humpback_P362	0	species
EU525339	murre_P34	3	order		JQ354384	rockfish_F169	1	genus		GQ353084	humpback_F287	0	species
EU525340	murre_P34	3	order		JQ354384	rockfish_R344	1	genus		GQ353084	humpback_R437	0	species
EU525340	murre_R138	3	order		JQ354385	rockfish_P294	4	genus		GQ353085	humpback_P362	0	species
EU525340	murre_F9	2	order		JQ354385	rockfish_F169	1	genus		GQ353085	humpback_F287	0	species
EU525341	murre_P34	3	order		JQ354385	rockfish_R344	1	genus		GQ353085	humpback_R437	0	species
EU525341	murre_R138	4	order		JQ354386	rockfish_P294	4	genus		GQ353086	humpback_P362	0	species
EU525341	murre_F9	2	order		JQ354386	rockfish_F169	1	genus		GQ353086	humpback_F287	0	species
EU525342	murre_P34	3	order		JQ354386	rockfish_R344	1	genus		GQ353086	humpback_R437	0	species
EU525342	murre_R138	4	order		JQ354387	rockfish_P294	4	genus		GQ353087	humpback_P362	0	species
EU525342	murre_F9	2	order		JQ354387	rockfish_F169	1	genus		GQ353087	humpback_F287	0	species
EU525343	murre_P34	3	order		JQ354387	rockfish_R344	1	genus		GQ353087	humpback_R437	0	species
EU525343	murre_R138	4	order		JQ354388	rockfish_P294	3	genus		GQ353088	humpback_P362	0	species
EU525343	murre_F9	2	order		JQ354388	rockfish_F169	0	genus		GQ353088	humpback_F287	0	species
EU525405	murre_R138	1	order		JQ354388	rockfish_R344	1	genus		GQ353088	humpback_R437	0	species
EU525405	murre_F9	3	order		JQ354389	rockfish_P294	3	genus		GQ353089	humpback_P362	0	species
EU525405	murre_P34	5	order		JQ354389	rockfish_F169	0	genus		GQ353089	humpback_F287	0	species
EU525406	murre_F9	1	order		JQ354389	rockfish_R344	1	genus		GQ353089	humpback_R437	0	species
EU525406	murre_P34	5	order		JQ354390	rockfish_P294	3	genus		GQ353090	humpback_P362	0	species
EU525406	murre_R138	1	order		JQ354390	rockfish_F169	0	genus		GQ353090	humpback_F287	0	species
EU525407	murre_F9	3	order		JQ354390	rockfish_R344	1	genus		GQ353090	humpback_R437	0	species
EU525407	murre_R138	1	order		JQ354391	rockfish_P294	3	genus		GQ353091	humpback_P362	0	species
EU525408	murre_R138	1	order		JQ354391	rockfish_F169	0	genus		GQ353091	humpback_F287	0	species
EU525409	murre_F9	3	order		JQ354391	rockfish_R344	1	genus		GQ353091	humpback_R437	0	species
EU525409	murre_P34	4	order		JQ354392	rockfish_P294	3	genus		GQ353092	humpback_P362	0	species
EU525409	murre_R138	1	order		JQ354392	rockfish_F169	0	genus		GQ353092	humpback_F287	0	species
EU525410	murre_P34	4	order		JQ354392	rockfish_R344	1	genus		GQ353092	humpback_R437	0	species
EU525410	murre_R138	1	order		JQ354393	rockfish_P294	3	genus		GQ353093	humpback_P362	0	species
EU525410	murre_F9	3	order		JQ354393	rockfish_F169	0	genus		GQ353093	humpback_F287	0	species
EU525411	murre_P34	4	order		JQ354393	rockfish_R344	1	genus		GQ353093	humpback_R437	0	species
EU525411	murre_R138	1	order		JQ672535	rockfish_P294	4	genus		GQ353094	humpback_P362	0	species
EU525411	murre_F9	3	order		JQ672535	rockfish_F169	0	genus		GQ353094	humpback_F287	0	species
EU525412	murre_P34	4	order		JQ672535	rockfish_R344	1	genus		GQ353094	humpback_R437	0	species
EU525412	murre_R138	1	order		JQ672536	rockfish_P294	3	genus		GQ353095	humpback_P362	0	species
EU525412	murre_F9	3	order		JQ672536	rockfish_F169	0	genus		GQ353095	humpback_F287	0	species
EU525413	murre_P34	4	order		JQ672536	rockfish_R344	2	genus		GQ353095	humpback_R437	0	species
EU525413	murre_R138	1	order		JQ672537	rockfish_P294	3	genus		GQ353096	humpback_P362	0	species
EU525413	murre_F9	3	order		JQ672537	rockfish_F169	0	genus		GQ353096	humpback_F287	0	species
EU525414	murre_P34	4	order		JQ672537	rockfish_R344	1	genus		GQ353096	humpback_R437	0	species
EU525414	murre_R138	1	order		JQ672538	rockfish_P294	3	genus		GQ353097	humpback_P362	0	species
EU525414	murre_F9	3	order		JQ672538	rockfish_R344	2	genus		GQ353097	humpback_F287	0	species
EU525415	murre_P34	4	order		JQ672538	rockfish_F169	0	genus		GQ353097	humpback_R437	0	species
EU525415	murre_R138	1	order		JQ672539	rockfish_P294	3	genus		GQ353098	humpback_P362	0	species
EU525415	murre_F9	3	order		JQ672539	rockfish_R344	1	genus		GQ353098	humpback_F287	0	species
FJ027266	murre_F9	2	order		JQ672539	rockfish_F169	0	genus		GQ353098	humpback_R437	0	species
FJ027266	murre_R138	0	order		JQ672540	rockfish_R344	2	genus		GQ353099	humpback_P362	0	species
FJ027266	murre_P34	5	order		JQ672540	rockfish_P294	3	genus		GQ353099	humpback_F287	0	species
FJ027267	murre_F9	2	order		JQ672540	rockfish_F169	0	genus		GQ353099	humpback_R437	0	species
FJ027267	murre_R138	0	order		JQ672541	rockfish_P294	3	genus		GQ353100	humpback_P362	0	species
FJ027267	murre_P34	5	order		JQ672541	rockfish_F169	0	genus		GQ353100	humpback_F287	0	species
FJ027268	murre_F9	2	order		JQ672542	rockfish_R344	2	genus		GQ353100	humpback_R437	0	species
FJ027268	murre_R138	0	order		JQ672542	rockfish_P294	4	genus		GQ353101	humpback_P362	0	species
FJ027268	murre_P34	5	order		JQ672542	rockfish_F169	0	genus		GQ353101	humpback_F287	0	species
FJ027269	murre_F9	2	order		JQ672543	rockfish_P294	3	genus		GQ353101	humpback_R437	0	species
FJ027269	murre_R138	0	order		JQ672543	rockfish_R344	2	genus		GQ353102	humpback_P362	0	species
FJ027269	murre_P34	5	order		JQ672543	rockfish_F169	0	genus		GQ353102	humpback_F287	0	species
FJ027270	murre_F9	2	order		JQ672544	rockfish_R344	2	genus		GQ353102	humpback_R437	0	species
FJ027270	murre_R138	3	order		JQ672544	rockfish_P294	3	genus		GQ353103	humpback_P362	0	species
FJ027270	murre_P34	4	order		JQ672544	rockfish_F169	0	genus		GQ353103	humpback_F287	0	species
FJ027271	murre_F9	2	order		JQ672545	rockfish_R344	2	genus		GQ353103	humpback_R437	0	species
FJ027271	murre_R138	3	order		JQ672545	rockfish_P294	3	genus		GQ353104	humpback_P362	0	species
FJ027271	murre_P34	4	order		JQ672545	rockfish_F169	0	genus		GQ353104	humpback_F287	0	species
FJ027337	murre_F9	1	order		JQ672551	rockfish_P294	3	genus		GQ353104	humpback_R437	0	species
FJ027337	murre_R138	3	order		JQ672551	rockfish_R344	2	genus		GQ353105	humpback_P362	0	species
FJ027337	murre_P34	5	order		JQ672551	rockfish_F169	0	genus		GQ353105	humpback_F287	0	species
FJ027338	murre_F9	1	order		JQ672552	rockfish_P294	3	genus		GQ353105	humpback_R437	0	species
FJ027338	murre_R138	3	order		JQ672552	rockfish_R344	2	genus		GQ353106	humpback_P362	0	species
FJ027338	murre_P34	5	order		JQ672552	rockfish_F169	0	genus		GQ353106	humpback_F287	0	species
FJ027339	murre_F9	1	order		JQ672554	rockfish_R344	2	genus		GQ353106	humpback_R437	0	species
FJ027339	murre_R138	3	order		JQ672554	rockfish_P294	3	genus		GQ353107	humpback_P362	0	species
FJ027339	murre_P34	5	order		JQ672554	rockfish_F169	0	genus		GQ353107	humpback_F287	0	species
FJ027340	murre_F9	1	order		JQ672555	rockfish_R344	2	genus		GQ353107	humpback_R437	0	species
FJ027340	murre_R138	3	order		JQ672555	rockfish_P294	3	genus		GQ353108	humpback_P362	0	species
FJ027340	murre_P34	5	order		JQ672555	rockfish_F169	0	genus		GQ353108	humpback_F287	0	species
FJ027341	murre_F9	1	order		JQ694035	rockfish_P294	4	genus		GQ353108	humpback_R437	0	species
FJ027341	murre_R138	3	order		JQ694035	rockfish_R344	1	genus		GQ353109	humpback_P362	0	species
FJ027341	murre_P34	5	order		JQ694035	rockfish_F169	0	genus		GQ353109	humpback_F287	0	species
FJ027342	murre_F9	1	order		JQ694036	rockfish_F169	0	genus		GQ353109	humpback_R437	0	species
FJ027342	murre_R138	3	order		JQ694036	rockfish_P294	4	genus		GQ353110	humpback_P362	0	species
FJ027342	murre_P34	5	order		JQ694036	rockfish_R344	1	genus		GQ353110	humpback_F287	0	species
FJ027343	murre_F9	1	order		JQ694037	rockfish_P294	3	genus		GQ353110	humpback_R437	0	species
FJ027343	murre_R138	3	order		JQ694037	rockfish_F169	0	genus		GQ353111	humpback_P362	0	species
FJ027343	murre_P34	5	order		JQ694037	rockfish_R344	1	genus		GQ353111	humpback_F287	0	species
FJ027344	murre_F9	1	order		JQ934993	rockfish_P294	4	genus		GQ353111	humpback_R437	0	species
FJ027344	murre_R138	3	order		JQ934993	rockfish_R344	1	genus		GQ353112	humpback_P362	0	species
FJ027344	murre_P34	5	order		JQ934993	rockfish_F169	0	genus		GQ353112	humpback_F287	0	species
FJ027345	murre_F9	1	order		JQ934999	rockfish_P294	4	genus		GQ353112	humpback_R437	0	species
FJ027345	murre_R138	2	order		JQ934999	rockfish_R344	1	genus		GQ353113	humpback_P362	0	species
FJ027345	murre_P34	5	order		JQ934999	rockfish_F169	0	genus		GQ353113	humpback_F287	0	species
FJ027346	murre_F9	1	order		JQ952602	rockfish_P294	3	genus		GQ353113	humpback_R437	0	species
FJ027346	murre_R138	2	order		JQ952602	rockfish_R344	2	genus		GQ353114	humpback_P362	0	species
FJ027346	murre_P34	5	order		JQ952602	rockfish_F169	0	genus		GQ353114	humpback_F287	0	species
FJ027347	murre_F9	1	order		JQ952603	rockfish_P294	3	genus		GQ353114	humpback_R437	0	species
FJ027347	murre_R138	3	order		JQ952603	rockfish_R344	2	genus		GQ353115	humpback_P362	0	species
FJ027347	murre_P34	3	order		JQ952603	rockfish_F169	0	genus		GQ353115	humpback_F287	0	species
FJ027348	murre_F9	2	order		JQ952604	rockfish_P294	3	genus		GQ353115	humpback_R437	0	species
FJ027348	murre_R138	2	order		JQ952604	rockfish_R344	2	genus		GQ353116	humpback_P362	0	species
FJ027348	murre_P34	4	order		JQ952604	rockfish_F169	0	genus		GQ353116	humpback_F287	0	species
FJ027605	murre_F9	0	order		JQ952605	rockfish_P294	3	genus		GQ353116	humpback_R437	0	species
FJ027605	murre_R138	4	order		JQ952605	rockfish_R344	2	genus		GQ353117	humpback_P362	0	species
FJ027605	murre_P34	4	order		JQ952605	rockfish_F169	0	genus		GQ353117	humpback_F287	0	species
FJ027606	murre_F9	0	order		JQ952606	rockfish_P294	3	genus		GQ353117	humpback_R437	0	species
FJ027606	murre_R138	4	order		JQ952606	rockfish_F169	0	genus		GQ353118	humpback_P362	0	species
FJ027606	murre_P34	4	order		JQ952606	rockfish_R344	2	genus		GQ353118	humpback_F287	0	species
FJ027607	murre_F9	0	order		JQ952607	rockfish_P294	3	genus		GQ353118	humpback_R437	0	species
FJ027607	murre_R138	4	order		JQ952607	rockfish_R344	2	genus		GQ353119	humpback_P362	0	species
FJ027607	murre_P34	4	order		JQ952607	rockfish_F169	0	genus		GQ353119	humpback_F287	0	species
FJ582600	murre_P34	3	order		JQ952608	rockfish_P294	3	genus		GQ353119	humpback_R437	0	species
FJ582600	murre_R138	5	order		JQ952608	rockfish_R344	2	genus		GQ353120	humpback_P362	0	species
FJ582601	murre_R138	5	order		JQ952608	rockfish_F169	0	genus		GQ353120	humpback_F287	0	species
FJ582601	murre_F9	1	order		JQ952609	rockfish_P294	3	genus		GQ353120	humpback_R437	0	species
FJ582601	murre_P34	3	order		JQ952609	rockfish_R344	2	genus		GQ353121	humpback_P362	0	species
FJ582602	murre_R138	5	order		JQ952609	rockfish_F169	0	genus		GQ353121	humpback_F287	0	species
FJ582602	murre_P34	3	order		JQ952611	rockfish_P294	3	genus		GQ353121	humpback_R437	0	species
FJ582603	murre_R138	5	order		JQ952611	rockfish_F169	0	genus		GQ353122	humpback_P362	0	species
FJ582603	murre_F9	1	order		JQ952611	rockfish_R344	1	genus		GQ353122	humpback_F287	0	species
FJ582603	murre_P34	3	order		JQ952612	rockfish_P294	3	genus		GQ353122	humpback_R437	0	species
FJ582604	murre_R138	5	order		JQ952612	rockfish_R344	2	genus		GQ353123	humpback_P362	0	species
FJ582604	murre_F9	1	order		JQ952612	rockfish_F169	0	genus		GQ353123	humpback_F287	0	species
FJ582604	murre_P34	3	order		JQ952613	rockfish_P294	3	genus		GQ353123	humpback_R437	0	species
FJ582605	murre_R138	5	order		JQ952613	rockfish_R344	2	genus		GQ353124	humpback_P362	0	species
FJ582605	murre_F9	1	order		JQ952613	rockfish_F169	0	genus		GQ353124	humpback_F287	0	species
FJ582605	murre_P34	3	order		JQ952616	rockfish_P294	3	genus		GQ353124	humpback_R437	0	species
FJ582606	murre_F9	1	order		JQ952616	rockfish_R344	2	genus		GQ353125	humpback_P362	0	species
FJ582606	murre_R138	5	order		JQ952616	rockfish_F169	1	genus		GQ353125	humpback_F287	0	species
FJ582606	murre_P34	3	order		JX008504	rockfish_P294	3	genus		GQ353125	humpback_R437	0	species
FJ582607	murre_F9	1	order		JX008504	rockfish_R344	1	genus		GQ353126	humpback_P362	0	species
FJ582607	murre_R138	5	order		JX008504	rockfish_F169	0	genus		GQ353126	humpback_F287	0	species
FJ582607	murre_P34	3	order		JX008527	rockfish_P294	4	genus		GQ353126	humpback_R437	0	species
FJ582608	murre_R138	5	order		JX008527	rockfish_R344	1	genus		GQ353127	humpback_F287	0	species
FJ582608	murre_F9	1	order		JX008527	rockfish_F169	0	genus		GQ353128	humpback_P362	0	species
FJ582608	murre_P34	3	order		JX008528	rockfish_P294	3	genus		GQ353128	humpback_F287	0	species
FJ582609	murre_P34	3	order		JX008528	rockfish_R344	1	genus		GQ353128	humpback_R437	0	species
FJ582609	murre_R138	4	order		JX008528	rockfish_F169	0	genus		GQ353129	humpback_F287	0	species
FJ582610	murre_F9	0	order		JX008529	rockfish_P294	3	genus		GQ353130	humpback_F287	0	species
FJ582610	murre_R138	4	order		JX008529	rockfish_R344	1	genus		GQ353131	humpback_P362	0	species
FJ582610	murre_P34	4	order		JX008529	rockfish_F169	0	genus		GQ353131	humpback_F287	0	species
FJ661098	murre_R138	4	order		JX008530	rockfish_P294	3	genus		GQ353131	humpback_R437	0	species
GQ481399	murre_F9	4	order		JX008530	rockfish_R344	1	genus		GQ353132	humpback_P362	0	species
GQ481399	murre_R138	3	order		JX008530	rockfish_F169	0	genus		GQ353132	humpback_F287	0	species
GQ481399	murre_P34	2	order		JX008531	rockfish_P294	3	genus		GQ353132	humpback_R437	0	species
GQ481400	murre_F9	4	order		JX008531	rockfish_R344	1	genus		GQ353133	humpback_P362	0	species
GQ481400	murre_R138	3	order		JX008531	rockfish_F169	0	genus		GQ353133	humpback_F287	0	species
GQ481400	murre_P34	2	order		JX008532	rockfish_P294	3	genus		GQ353133	humpback_R437	0	species
GQ481405	murre_F9	4	order		JX008532	rockfish_R344	1	genus		GQ353134	humpback_P362	0	species
GQ481405	murre_R138	2	order		JX008532	rockfish_F169	0	genus		GQ353134	humpback_F287	0	species
GQ481405	murre_P34	4	order		JX008533	rockfish_P294	4	genus		GQ353134	humpback_R437	0	species
GQ481429	murre_F9	1	order		JX008533	rockfish_R344	1	genus		GQ353135	humpback_P362	0	species
GQ481429	murre_R138	1	order		JX008533	rockfish_F169	0	genus		GQ353135	humpback_F287	0	species
GQ481429	murre_P34	5	order		JX008534	rockfish_P294	3	genus		GQ353135	humpback_R437	0	species
GQ481430	murre_F9	1	order		JX008534	rockfish_R344	1	genus		GQ353136	humpback_P362	0	species
GQ481430	murre_R138	1	order		JX008534	rockfish_F169	0	genus		GQ353136	humpback_F287	0	species
GQ481430	murre_P34	5	order		JX008535	rockfish_R344	1	genus		GQ353137	humpback_P362	0	species
GQ481431	murre_F9	1	order		JX008535	rockfish_P294	3	genus		GQ353137	humpback_F287	0	species
GQ481431	murre_R138	1	order		JX008535	rockfish_F169	0	genus		GQ353137	humpback_R437	0	species
GQ481431	murre_P34	5	order		JX008536	rockfish_P294	3	genus		GQ353138	humpback_P362	0	species
GQ481432	murre_F9	1	order		JX008536	rockfish_R344	1	genus		GQ353138	humpback_F287	0	species
GQ481432	murre_R138	1	order		JX008536	rockfish_F169	0	genus		GQ353138	humpback_R437	0	species
GQ481432	murre_P34	5	order		JX110801	rockfish_P294	3	genus		GQ353139	humpback_P362	0	species
GQ481433	murre_F9	1	order		JX110801	rockfish_R344	1	genus		GQ353139	humpback_F287	0	species
GQ481433	murre_R138	2	order		JX110801	rockfish_F169	0	genus		GQ353139	humpback_R437	0	species
GQ481433	murre_P34	3	order		JX110802	rockfish_P294	3	genus		GQ353140	humpback_P362	0	species
GQ481434	murre_F9	1	order		JX110802	rockfish_F169	0	genus		GQ353140	humpback_F287	0	species
GQ481434	murre_R138	2	order		JX110802	rockfish_R344	1	genus		GQ353140	humpback_R437	0	species
GQ481434	murre_P34	3	order		JX110809	rockfish_P294	3	genus		GQ353141	humpback_P362	0	species
GQ481435	murre_F9	2	order		JX110809	rockfish_R344	1	genus		GQ353141	humpback_F287	0	species
GQ481435	murre_R138	1	order		JX110809	rockfish_F169	0	genus		GQ353141	humpback_R437	0	species
GQ481435	murre_P34	4	order		JX110810	rockfish_P294	3	genus		GQ353142	humpback_P362	0	species
GQ481436	murre_F9	2	order		JX110810	rockfish_R344	1	genus		GQ353142	humpback_F287	0	species
GQ481436	murre_R138	1	order		JX110810	rockfish_F169	0	genus		GQ353142	humpback_R437	0	species
GQ481436	murre_P34	4	order		JX110811	rockfish_P294	3	genus		GQ353143	humpback_P362	0	species
GQ481437	murre_F9	2	order		JX110811	rockfish_R344	1	genus		GQ353143	humpback_F287	0	species
GQ481437	murre_R138	1	order		JX110811	rockfish_F169	0	genus		GQ353143	humpback_R437	0	species
GQ481437	murre_P34	4	order		JX124732	rockfish_P294	3	genus		GQ353144	humpback_P362	0	species
GQ481438	murre_F9	0	order		JX124732	rockfish_R344	2	genus		GQ353144	humpback_F287	0	species
GQ481438	murre_R138	1	order		JX124732	rockfish_F169	0	genus		GQ353144	humpback_R437	0	species
GQ481438	murre_P34	4	order		JX124733	rockfish_P294	3	genus		GQ353145	humpback_P362	0	species
GQ481439	murre_F9	2	order		JX124733	rockfish_R344	2	genus		GQ353145	humpback_F287	0	species
GQ481439	murre_R138	0	order		JX124733	rockfish_F169	0	genus		GQ353145	humpback_R437	0	species
GQ481439	murre_P34	5	order		JX295808	rockfish_P294	3	genus		GQ353146	humpback_P362	0	species
GQ481440	murre_F9	2	order		JX295808	rockfish_F169	0	genus		GQ353146	humpback_F287	0	species
GQ481440	murre_R138	1	order		JX295808	rockfish_R344	1	genus		GQ353146	humpback_R437	0	species
GQ481440	murre_P34	5	order		JX295809	rockfish_P294	3	genus		GQ353147	humpback_P362	0	species
GQ481441	murre_F9	1	order		JX295809	rockfish_F169	0	genus		GQ353147	humpback_F287	0	species
GQ481441	murre_R138	0	order		JX295809	rockfish_R344	1	genus		GQ353147	humpback_R437	0	species
GQ481441	murre_P34	3	order		JX295812	rockfish_P294	4	genus		GQ353148	humpback_P362	0	species
GQ481442	murre_F9	2	order		JX295812	rockfish_F169	0	genus		GQ353148	humpback_F287	0	species
GQ481442	murre_R138	3	order		JX295812	rockfish_R344	1	genus		GQ353148	humpback_R437	0	species
GQ481442	murre_P34	4	order		JX295824	rockfish_P294	3	genus		GQ353149	humpback_P362	0	species
GQ481443	murre_F9	2	order		JX295824	rockfish_R344	1	genus		GQ353149	humpback_F287	0	species
GQ481443	murre_R138	3	order		JX295824	rockfish_F169	0	genus		GQ353149	humpback_R437	0	species
GQ481443	murre_P34	3	order		JX295826	rockfish_P294	3	genus		GQ353150	humpback_P362	0	species
GQ481444	murre_F9	2	order		JX295826	rockfish_F169	0	genus		GQ353150	humpback_F287	0	species
GQ481444	murre_R138	3	order		JX295826	rockfish_R344	2	genus		GQ353150	humpback_R437	0	species
GQ481444	murre_P34	4	order		JX295836	rockfish_P294	3	genus		GQ353151	humpback_P362	0	species
GQ481534	murre_F9	2	order		JX295836	rockfish_R344	1	genus		GQ353151	humpback_F287	0	species
GQ481534	murre_R138	1	order		JX295836	rockfish_F169	0	genus		GQ353151	humpback_R437	0	species
GQ481534	murre_P34	3	order		JX295839	rockfish_P294	3	genus		GQ353152	humpback_P362	0	species
GQ481535	murre_F9	2	order		JX295839	rockfish_F169	0	genus		GQ353152	humpback_F287	0	species
GQ481535	murre_R138	1	order		JX295839	rockfish_R344	2	genus		GQ353152	humpback_R437	0	species
GQ481535	murre_P34	3	order		JX438498	rockfish_P294	3	genus		GQ353153	humpback_P362	0	species
GQ481536	murre_F9	2	order		JX438498	rockfish_R344	1	genus		GQ353153	humpback_F287	0	species
GQ481536	murre_R138	1	order		JX438498	rockfish_F169	0	genus		GQ353153	humpback_R437	0	species
GQ481536	murre_P34	3	order		JX438499	rockfish_P294	3	genus		GQ353154	humpback_P362	0	species
GQ481560	murre_F9	1	order		JX438499	rockfish_R344	1	genus		GQ353154	humpback_F287	0	species
GQ481560	murre_R138	4	order		JX438499	rockfish_F169	0	genus		GQ353154	humpback_R437	0	species
GQ481560	murre_P34	5	order		JX438500	rockfish_P294	3	genus		GQ353155	humpback_P362	0	species
GQ481561	murre_F9	1	order		JX438500	rockfish_F169	0	genus		GQ353155	humpback_F287	0	species
GQ481561	murre_R138	4	order		JX438500	rockfish_R344	1	genus		GQ353155	humpback_R437	0	species
GQ481561	murre_P34	5	order		JX438501	rockfish_P294	4	genus		GQ353156	humpback_P362	0	species
GQ481562	murre_F9	1	order		JX438501	rockfish_R344	1	genus		GQ353156	humpback_F287	0	species
GQ481562	murre_R138	4	order		JX438501	rockfish_F169	0	genus		GQ353156	humpback_R437	0	species
GQ481562	murre_P34	5	order		JX438504	rockfish_F169	0	genus		GQ353157	humpback_P362	0	species
GQ481563	murre_F9	1	order		JX438504	rockfish_P294	3	genus		GQ353157	humpback_F287	0	species
GQ481563	murre_R138	4	order		JX438504	rockfish_R344	2	genus		GQ353157	humpback_R437	0	species
GQ481563	murre_P34	5	order		JX438514	rockfish_P294	3	genus		GQ353158	humpback_P362	0	species
GQ481564	murre_F9	1	order		JX438514	rockfish_R344	2	genus		GQ353158	humpback_F287	0	species
GQ481564	murre_R138	4	order		JX438514	rockfish_F169	0	genus		GQ353158	humpback_R437	0	species
GQ481564	murre_P34	2	order		JX438528	rockfish_P294	3	genus		GQ353159	humpback_P362	0	species
GQ481565	murre_F9	1	order		JX438528	rockfish_R344	2	genus		GQ353159	humpback_F287	0	species
GQ481565	murre_R138	4	order		JX438528	rockfish_F169	0	genus		GQ353159	humpback_R437	0	species
GQ481565	murre_P34	2	order		JX444757	rockfish_P294	3	genus		GQ353160	humpback_P362	0	species
GQ481566	murre_F9	1	order		JX444757	rockfish_R344	1	genus		GQ353160	humpback_F287	0	species
GQ481566	murre_R138	4	order		JX444757	rockfish_F169	0	genus		GQ353160	humpback_R437	0	species
GQ481566	murre_P34	2	order		JX444759	rockfish_P294	4	genus		GQ353161	humpback_P362	0	species
GQ481567	murre_F9	1	order		JX444759	rockfish_R344	1	genus		GQ353161	humpback_F287	0	species
GQ481567	murre_R138	4	order		JX444759	rockfish_F169	0	genus		GQ353161	humpback_R437	0	species
GQ481567	murre_P34	2	order		JX444760	rockfish_P294	3	genus		GQ353162	humpback_P362	0	species
GQ481568	murre_F9	1	order		JX444760	rockfish_R344	1	genus		GQ353162	humpback_F287	0	species
GQ481568	murre_R138	4	order		JX444760	rockfish_F169	0	genus		GQ353162	humpback_R437	0	species
GQ481568	murre_P34	2	order		JX444761	rockfish_P294	3	genus		GQ353163	humpback_P362	0	species
GQ481569	murre_F9	1	order		JX444761	rockfish_F169	0	genus		GQ353163	humpback_F287	0	species
GQ481569	murre_R138	3	order		JX444761	rockfish_R344	1	genus		GQ353163	humpback_R437	0	species
GQ481569	murre_P34	4	order		JX444763	rockfish_P294	3	genus		GQ353164	humpback_P362	0	species
GQ481570	murre_F9	1	order		JX444763	rockfish_R344	1	genus		GQ353164	humpback_F287	0	species
GQ481570	murre_R138	3	order		JX444763	rockfish_F169	0	genus		GQ353164	humpback_R437	0	species
GQ481570	murre_P34	4	order		JX444764	rockfish_P294	3	genus		GQ353165	humpback_P362	0	species
GQ481571	murre_F9	1	order		JX444764	rockfish_F169	0	genus		GQ353165	humpback_F287	0	species
GQ481571	murre_R138	3	order		JX444764	rockfish_R344	1	genus		GQ353165	humpback_R437	0	species
GQ481571	murre_P34	4	order		JX444765	rockfish_P294	3	genus		GQ353166	humpback_P362	0	species
GQ481572	murre_F9	1	order		JX444765	rockfish_R344	1	genus		GQ353166	humpback_F287	0	species
GQ481572	murre_R138	3	order		JX444765	rockfish_F169	0	genus		GQ353166	humpback_R437	0	species
GQ481572	murre_P34	4	order		JX444766	rockfish_P294	3	genus		GQ353167	humpback_P362	0	species
GQ481573	murre_F9	2	order		JX444766	rockfish_R344	1	genus		GQ353167	humpback_F287	0	species
GQ481573	murre_R138	1	order		JX444766	rockfish_F169	0	genus		GQ353167	humpback_R437	0	species
GQ481574	murre_F9	3	order		JX444767	rockfish_P294	3	genus		GQ353168	humpback_P362	0	species
GQ481574	murre_R138	3	order		JX444767	rockfish_F169	0	genus		GQ353168	humpback_F287	0	species
GQ481574	murre_P34	4	order		JX444767	rockfish_R344	1	genus		GQ353168	humpback_R437	0	species
GQ481575	murre_F9	3	order		JX444768	rockfish_P294	3	genus		GQ353169	humpback_P362	0	species
GQ481575	murre_R138	3	order		JX444768	rockfish_R344	1	genus		GQ353169	humpback_F287	0	species
GQ481575	murre_P34	4	order		JX444768	rockfish_F169	0	genus		GQ353169	humpback_R437	0	species
GQ481576	murre_F9	3	order		JX444769	rockfish_P294	3	genus		GQ353170	humpback_P362	0	species
GQ481576	murre_R138	3	order		JX444769	rockfish_R344	1	genus		GQ353170	humpback_F287	0	species
GQ481576	murre_P34	4	order		JX444769	rockfish_F169	0	genus		GQ353170	humpback_R437	0	species
GQ481577	murre_F9	3	order		JX444770	rockfish_P294	3	genus		GQ353171	humpback_P362	0	species
GQ481577	murre_R138	3	order		JX444770	rockfish_R344	1	genus		GQ353171	humpback_F287	0	species
GQ481577	murre_P34	4	order		JX444770	rockfish_F169	0	genus		GQ353171	humpback_R437	0	species
GQ481578	murre_F9	2	order		JX444771	rockfish_P294	3	genus		GQ353172	humpback_P362	0	species
GQ481578	murre_R138	3	order		JX444771	rockfish_R344	1	genus		GQ353172	humpback_F287	0	species
GQ481578	murre_P34	3	order		JX444771	rockfish_F169	0	genus		GQ353172	humpback_R437	0	species
GQ481579	murre_F9	2	order		JX444773	rockfish_P294	3	genus		GQ353173	humpback_P362	0	species
GQ481579	murre_R138	3	order		JX444773	rockfish_R344	1	genus		GQ353173	humpback_F287	0	species
GQ481579	murre_P34	3	order		JX444773	rockfish_F169	0	genus		GQ353173	humpback_R437	0	species
GQ481580	murre_F9	2	order		JX444775	rockfish_P294	3	genus		GQ353174	humpback_P362	0	species
GQ481580	murre_R138	3	order		JX444775	rockfish_R344	1	genus		GQ353174	humpback_F287	0	species
GQ481580	murre_P34	3	order		JX444775	rockfish_F169	0	genus		GQ353174	humpback_R437	0	species
GQ481581	murre_F9	2	order		JX444778	rockfish_P294	3	genus		GQ353175	humpback_P362	0	species
GQ481581	murre_R138	4	order		JX444778	rockfish_R344	1	genus		GQ353175	humpback_F287	0	species
GQ481581	murre_P34	3	order		JX444778	rockfish_F169	0	genus		GQ353175	humpback_R437	0	species
GQ481582	murre_F9	2	order		JX444779	rockfish_P294	1	genus		GQ353176	humpback_P362	0	species
GQ481582	murre_R138	4	order		JX444779	rockfish_R344	1	genus		GQ353176	humpback_F287	0	species
GQ481582	murre_P34	3	order		JX444779	rockfish_F169	1	genus		GQ353176	humpback_R437	0	species
GQ481583	murre_F9	2	order		JX444780	rockfish_R344	1	genus		GQ353177	humpback_P362	0	species
GQ481583	murre_R138	3	order		JX444780	rockfish_P294	3	genus		GQ353177	humpback_F287	0	species
GQ481583	murre_P34	3	order		JX444780	rockfish_F169	0	genus		GQ353177	humpback_R437	0	species
GQ481922	murre_F9	1	order		JX444783	rockfish_P294	3	genus		GQ353178	humpback_P362	0	species
GQ481922	murre_R138	1	order		JX444783	rockfish_F169	0	genus		GQ353178	humpback_F287	0	species
GQ481922	murre_P34	5	order		JX444783	rockfish_R344	1	genus		GQ353178	humpback_R437	0	species
GQ481923	murre_F9	1	order		JX444784	rockfish_P294	1	genus		GQ353179	humpback_P362	0	species
GQ481923	murre_R138	1	order		JX444784	rockfish_R344	1	genus		GQ353179	humpback_F287	0	species
GQ481923	murre_P34	5	order		JX444784	rockfish_F169	1	genus		GQ353179	humpback_R437	0	species
GQ481943	murre_F9	1	order		JX444785	rockfish_P294	3	genus		GQ353180	humpback_P362	0	species
GQ481943	murre_R138	5	order		JX444785	rockfish_R344	1	genus		GQ353180	humpback_F287	0	species
GQ481943	murre_P34	3	order		JX444785	rockfish_F169	0	genus		GQ353180	humpback_R437	0	species
GQ481944	murre_F9	1	order		JX487221	rockfish_P294	3	genus		GQ353181	humpback_P362	0	species
GQ481944	murre_R138	5	order		JX487221	rockfish_F169	0	genus		GQ353181	humpback_F287	0	species
GQ481944	murre_P34	3	order		JX487221	rockfish_R344	1	genus		GQ353181	humpback_R437	0	species
GQ481945	murre_F9	1	order		JX487224	rockfish_P294	3	genus		GQ353182	humpback_P362	0	species
GQ481945	murre_R138	5	order		JX487224	rockfish_R344	1	genus		GQ353182	humpback_F287	0	species
GQ481945	murre_P34	3	order		JX487224	rockfish_F169	0	genus		GQ353182	humpback_R437	0	species
GQ481946	murre_F9	1	order		JX487231	rockfish_P294	3	genus		GQ353183	humpback_P362	0	species
GQ481946	murre_R138	5	order		JX487231	rockfish_R344	1	genus		GQ353183	humpback_F287	0	species
GQ481946	murre_P34	3	order		JX487231	rockfish_F169	0	genus		GQ353183	humpback_R437	0	species
GQ481947	murre_F9	1	order		JX495617	rockfish_R344	1	genus		GQ353184	humpback_P362	0	species
GQ481947	murre_R138	3	order		JX495617	rockfish_P294	3	genus		GQ353184	humpback_F287	0	species
GQ481947	murre_P34	4	order		JX495617	rockfish_F169	0	genus		GQ353184	humpback_R437	0	species
GQ481948	murre_F9	1	order		JX495618	rockfish_P294	3	genus		GQ353185	humpback_P362	0	species
GQ481948	murre_R138	2	order		JX495618	rockfish_F169	0	genus		GQ353185	humpback_F287	0	species
GQ481948	murre_P34	4	order		JX495618	rockfish_R344	1	genus		GQ353185	humpback_R437	0	species
GQ481949	murre_F9	2	order		JX495623	rockfish_R344	1	genus		GQ353186	humpback_P362	0	species
GQ481949	murre_R138	3	order		JX495623	rockfish_P294	3	genus		GQ353186	humpback_F287	0	species
GQ481949	murre_P34	5	order		JX495623	rockfish_F169	0	genus		GQ353186	humpback_R437	0	species
GQ481950	murre_F9	2	order		JX495624	rockfish_P294	3	genus		GQ353187	humpback_P362	0	species
GQ481950	murre_R138	3	order		JX495624	rockfish_R344	1	genus		GQ353187	humpback_F287	0	species
GQ481950	murre_P34	5	order		JX495624	rockfish_F169	0	genus		GQ353187	humpback_R437	0	species
GQ481951	murre_F9	2	order		JX495627	rockfish_P294	3	genus		GQ353188	humpback_P362	0	species
GQ481951	murre_R138	3	order		JX495627	rockfish_R344	1	genus		GQ353188	humpback_F287	0	species
GQ481951	murre_P34	5	order		JX495627	rockfish_F169	0	genus		GQ353188	humpback_R437	0	species
GQ481952	murre_F9	2	order		JX495630	rockfish_P294	1	genus		GQ353189	humpback_F287	0	species
GQ481952	murre_R138	3	order		JX495630	rockfish_R344	1	genus		GQ353190	humpback_P362	0	species
GQ481952	murre_P34	5	order		JX495630	rockfish_F169	1	genus		GQ353190	humpback_F287	0	species
GQ481953	murre_F9	2	order		JX495632	rockfish_P294	3	genus		GQ353190	humpback_R437	0	species
GQ481953	murre_R138	3	order		JX495632	rockfish_R344	1	genus		GQ353191	humpback_P362	0	species
GQ481953	murre_P34	5	order		JX495632	rockfish_F169	0	genus		GQ353191	humpback_F287	0	species
GQ481954	murre_F9	2	order		KF408121	rockfish_R344	1	genus		GQ353191	humpback_R437	0	species
GQ481954	murre_R138	3	order		KF408121	rockfish_P294	4	genus		GQ353192	humpback_P362	0	species
GQ481954	murre_P34	5	order		KF408121	rockfish_F169	0	genus		GQ353192	humpback_F287	0	species
GQ481955	murre_F9	2	order		KF408122	rockfish_P294	4	genus		GQ353192	humpback_R437	0	species
GQ481955	murre_R138	3	order		KF408122	rockfish_F169	0	genus		GQ353193	humpback_P362	0	species
GQ481955	murre_P34	5	order		KF408122	rockfish_R344	1	genus		GQ353193	humpback_F287	0	species
GQ481966	murre_F9	3	order		KF408123	rockfish_F169	0	genus		GQ353193	humpback_R437	0	species
GQ481966	murre_R138	3	order		KF408123	rockfish_P294	4	genus		GQ353194	humpback_P362	0	species
GQ481966	murre_P34	4	order		KF408123	rockfish_R344	1	genus		GQ353194	humpback_F287	0	species
GQ481967	murre_F9	3	order		KF408124	rockfish_P294	3	genus		GQ353194	humpback_R437	0	species
GQ481967	murre_R138	3	order		KF408124	rockfish_R344	1	genus		GQ353195	humpback_P362	0	species
GQ481967	murre_P34	4	order		KF408124	rockfish_F169	0	genus		GQ353195	humpback_F287	0	species
GQ481968	murre_F9	3	order		KF408125	rockfish_P294	3	genus		GQ353195	humpback_R437	2	species
GQ481968	murre_R138	3	order		KF408125	rockfish_R344	1	genus		GQ353196	humpback_P362	0	species
GQ481968	murre_P34	4	order		KF408125	rockfish_F169	0	genus		GQ353196	humpback_F287	0	species
GQ481969	murre_F9	3	order		KF408126	rockfish_F169	0	genus		GQ353196	humpback_R437	0	species
GQ481969	murre_R138	3	order		KF408126	rockfish_P294	3	genus		GQ353197	humpback_P362	0	species
GQ481969	murre_P34	4	order		KF408126	rockfish_R344	2	genus		GQ353197	humpback_F287	0	species
GQ481970	murre_F9	3	order		KF415200	rockfish_P294	4	genus		GQ353197	humpback_R437	2	species
GQ481970	murre_R138	3	order		KF415200	rockfish_R344	1	genus		GQ353198	humpback_P362	0	species
GQ481970	murre_P34	4	order		KF415200	rockfish_F169	0	genus		GQ353198	humpback_F287	0	species
GQ482366	murre_F9	1	order		KF415201	rockfish_P294	4	genus		GQ353198	humpback_R437	0	species
GQ482366	murre_R138	1	order		KF415201	rockfish_F169	0	genus		GQ353199	humpback_P362	0	species
GQ482366	murre_P34	3	order		KF415201	rockfish_R344	1	genus		GQ353199	humpback_F287	0	species
GQ482368	murre_F9	1	order		KF415202	rockfish_P294	4	genus		GQ353199	humpback_R437	0	species
GQ482368	murre_R138	1	order		KF415202	rockfish_R344	1	genus		GQ353200	humpback_P362	0	species
GQ482368	murre_P34	3	order		KF415202	rockfish_F169	0	genus		GQ353200	humpback_F287	0	species
GQ482369	murre_F9	1	order		KF415203	rockfish_P294	3	genus		GQ353200	humpback_R437	0	species
GQ482369	murre_R138	1	order		KF415203	rockfish_F169	0	genus		GQ353201	humpback_P362	0	species
GQ482369	murre_P34	3	order		KF415203	rockfish_R344	1	genus		GQ353201	humpback_F287	0	species
GU571296	murre_P34	5	order		KF415204	rockfish_P294	3	genus		GQ353201	humpback_R437	0	species
GU571296	murre_R138	1	order		KF415204	rockfish_F169	0	genus		GQ353202	humpback_P362	0	species
GU571296	murre_F9	1	order		KF415204	rockfish_R344	1	genus		GQ353202	humpback_F287	0	species
GU571297	murre_P34	3	order		KF415205	rockfish_R344	1	genus		GQ353202	humpback_R437	0	species
GU571297	murre_F9	1	order		KF415205	rockfish_F169	0	genus		GQ353203	humpback_P362	0	species
GU571297	murre_R138	2	order		KF415205	rockfish_P294	3	genus		GQ353203	humpback_F287	0	species
GU571298	murre_R138	2	order		KF415206	rockfish_P294	3	genus		GQ353203	humpback_R437	0	species
GU571298	murre_F9	1	order		KF415206	rockfish_R344	1	genus		GQ353204	humpback_P362	0	species
GU571298	murre_P34	3	order		KF415206	rockfish_F169	0	genus		GQ353204	humpback_F287	0	species
GU571299	murre_P34	4	order		KF415207	rockfish_P294	4	genus		GQ353204	humpback_R437	0	species
GU571299	murre_F9	2	order		KF415207	rockfish_F169	0	genus		GQ353205	humpback_P362	0	species
GU571299	murre_R138	1	order		KF415207	rockfish_R344	1	genus		GQ353205	humpback_F287	0	species
GU571300	murre_P34	4	order		KF415209	rockfish_P294	4	genus		GQ353205	humpback_R437	0	species
GU571300	murre_R138	1	order		KF415209	rockfish_F169	0	genus		GQ353206	humpback_P362	0	species
GU571300	murre_F9	2	order		KF415209	rockfish_R344	1	genus		GQ353206	humpback_F287	0	species
GU571301	murre_R138	1	order		KF415210	rockfish_R344	1	genus		GQ353206	humpback_R437	0	species
GU571301	murre_F9	0	order		KF415210	rockfish_P294	4	genus		GQ353207	humpback_P362	0	species
GU571301	murre_P34	4	order		KF415210	rockfish_F169	0	genus		GQ353207	humpback_F287	0	species
GU571302	murre_P34	3	order		KF415211	rockfish_P294	3	genus		GQ353207	humpback_R437	0	species
GU571302	murre_R138	2	order		KF415211	rockfish_F169	0	genus		GQ353208	humpback_P362	0	species
GU571302	murre_F9	1	order		KF415211	rockfish_R344	1	genus		GQ353208	humpback_F287	0	species
GU571303	murre_P34	3	order		KF415212	rockfish_P294	3	genus		GQ353208	humpback_R437	0	species
GU571303	murre_R138	2	order		KF415212	rockfish_F169	0	genus		GQ353209	humpback_P362	0	species
GU571303	murre_F9	1	order		KF415212	rockfish_R344	1	genus		GQ353209	humpback_F287	0	species
GU571304	murre_P34	5	order		KF415215	rockfish_R344	1	genus		GQ353209	humpback_R437	0	species
GU571304	murre_F9	2	order		KF415215	rockfish_P294	4	genus		GQ353210	humpback_P362	0	species
GU571304	murre_R138	0	order		KF415215	rockfish_F169	0	genus		GQ353210	humpback_F287	0	species
GU571305	murre_F9	2	order		KF415216	rockfish_P294	3	genus		GQ353210	humpback_R437	0	species
GU571305	murre_R138	0	order		KF415216	rockfish_R344	1	genus		GQ353211	humpback_P362	0	species
GU571305	murre_P34	5	order		KF415216	rockfish_F169	1	genus		GQ353211	humpback_F287	0	species
GU571306	murre_R138	0	order		KF415219	rockfish_P294	3	genus		GQ353211	humpback_R437	0	species
GU571306	murre_F9	1	order		KF415219	rockfish_F169	0	genus		GQ353212	humpback_P362	0	species
GU571306	murre_P34	3	order		KF415219	rockfish_R344	2	genus		GQ353212	humpback_F287	0	species
GU571325	murre_P34	4	order		KF918900	rockfish_P294	4	genus		GQ353212	humpback_R437	0	species
GU571325	murre_F9	3	order		KF918900	rockfish_R344	1	genus		GQ353213	humpback_P362	0	species
GU571325	murre_R138	2	order		KF918900	rockfish_F169	0	genus		GQ353213	humpback_F287	0	species
GU571326	murre_P34	3	order		KF918901	rockfish_P294	3	genus		GQ353213	humpback_R437	0	species
GU571326	murre_F9	3	order		KF918901	rockfish_R344	1	genus		GQ353214	humpback_P362	0	species
GU571326	murre_R138	2	order		KF918901	rockfish_F169	0	genus		GQ353214	humpback_F287	0	species
GU571329	murre_P34	2	order		KF918902	rockfish_P294	4	genus		GQ353214	humpback_R437	0	species
GU571329	murre_F9	1	order		KF918902	rockfish_F169	0	genus		GQ353215	humpback_P362	0	species
GU571329	murre_R138	4	order		KF918902	rockfish_R344	1	genus		GQ353215	humpback_F287	0	species
GU571330	murre_P34	5	order		KF918903	rockfish_P294	4	genus		GQ353215	humpback_R437	0	species
GU571330	murre_F9	1	order		KF918903	rockfish_R344	1	genus		GQ353216	humpback_P362	0	species
GU571330	murre_R138	3	order		KF918903	rockfish_F169	0	genus		GQ353216	humpback_F287	0	species
GU571331	murre_P34	5	order		KF918904	rockfish_P294	4	genus		GQ353216	humpback_R437	0	species
GU571331	murre_R138	3	order		KF918904	rockfish_R344	2	genus		GQ353217	humpback_P362	0	species
GU571332	murre_R138	1	order		KF918904	rockfish_F169	0	genus		GQ353217	humpback_F287	0	species
GU571332	murre_F9	2	order		KF918905	rockfish_P294	4	genus		GQ353217	humpback_R437	0	species
GU571333	murre_R138	1	order		KF918905	rockfish_R344	2	genus		GQ353218	humpback_P362	0	species
GU571333	murre_F9	2	order		KF918905	rockfish_F169	0	genus		GQ353218	humpback_F287	0	species
GU571399	murre_F9	3	order		KF918906	rockfish_P294	4	genus		GQ353218	humpback_R437	0	species
GU571399	murre_R138	1	order		KF918906	rockfish_R344	2	genus		GQ353219	humpback_P362	0	species
GU571399	murre_P34	5	order		KF918906	rockfish_F169	0	genus		GQ353219	humpback_F287	0	species
GU571400	murre_R138	1	order		KF918907	rockfish_P294	4	genus		GQ353219	humpback_R437	0	species
GU571400	murre_F9	3	order		KF918907	rockfish_R344	2	genus		GQ353220	humpback_P362	0	species
GU571400	murre_P34	5	order		KF918907	rockfish_F169	0	genus		GQ353220	humpback_F287	0	species
GU571409	murre_P34	3	order		KF918908	rockfish_P294	4	genus		GQ353220	humpback_R437	0	species
GU571409	murre_F9	1	order		KF918908	rockfish_F169	0	genus		GQ353221	humpback_P362	0	species
GU571409	murre_R138	5	order		KF918908	rockfish_R344	2	genus		GQ353221	humpback_F287	0	species
GU571410	murre_F9	1	order		KF918909	rockfish_P294	4	genus		GQ353221	humpback_R437	0	species
GU571410	murre_P34	3	order		KF918909	rockfish_F169	0	genus		GQ353222	humpback_P362	0	species
GU571410	murre_R138	5	order		KF918909	rockfish_R344	2	genus		GQ353222	humpback_F287	0	species
GU571411	murre_R138	2	order		KF918910	rockfish_P294	4	genus		GQ353222	humpback_R437	0	species
GU571411	murre_F9	1	order		KF918910	rockfish_R344	2	genus		GQ353223	humpback_P362	0	species
GU571411	murre_P34	4	order		KF918910	rockfish_F169	0	genus		GQ353223	humpback_F287	0	species
GU571412	murre_R138	2	order		KF918911	rockfish_P294	3	genus		GQ353223	humpback_R437	0	species
GU571412	murre_F9	1	order		KF918911	rockfish_R344	2	genus		GQ353224	humpback_P362	0	species
GU571412	murre_P34	4	order		KF918911	rockfish_F169	0	genus		GQ353224	humpback_F287	0	species
GU571626	murre_F9	2	order		KF918912	rockfish_P294	3	genus		GQ353224	humpback_R437	0	species
GU571626	murre_R138	3	order		KF918912	rockfish_R344	1	genus		GQ353225	humpback_P362	0	species
GU571626	murre_P34	4	order		KF918912	rockfish_F169	0	genus		GQ353225	humpback_F287	0	species
GU571775	murre_P34	5	order		KF918913	rockfish_P294	3	genus		GQ353225	humpback_R437	0	species
GU571775	murre_R138	1	order		KF918913	rockfish_R344	1	genus		GQ353226	humpback_P362	0	species
GU571775	murre_F9	1	order		KF918913	rockfish_F169	0	genus		GQ353226	humpback_F287	0	species
GU571776	murre_P34	3	order		KF918914	rockfish_P294	3	genus		GQ353226	humpback_R437	0	species
GU571776	murre_R138	2	order		KF918914	rockfish_R344	1	genus		GQ353227	humpback_P362	0	species
GU571776	murre_F9	1	order		KF918914	rockfish_F169	0	genus		GQ353227	humpback_F287	0	species
GU571777	murre_P34	3	order		KF918915	rockfish_P294	3	genus		GQ353227	humpback_R437	0	species
GU571777	murre_R138	2	order		KF918915	rockfish_R344	1	genus		GQ353228	humpback_P362	0	species
GU571777	murre_F9	1	order		KF918915	rockfish_F169	0	genus		GQ353228	humpback_F287	0	species
GU571778	murre_P34	4	order		KF918916	rockfish_P294	3	genus		GQ353228	humpback_R437	0	species
GU571778	murre_R138	1	order		KF918916	rockfish_R344	1	genus		GQ353229	humpback_P362	1	species
GU571778	murre_F9	2	order		KF918916	rockfish_F169	0	genus		GQ353229	humpback_F287	0	species
GU571779	murre_P34	4	order		KF918917	rockfish_P294	3	genus		GQ353229	humpback_R437	0	species
GU571779	murre_R138	1	order		KF918917	rockfish_R344	1	genus		GQ353230	humpback_P362	1	species
GU571779	murre_F9	2	order		KF918917	rockfish_F169	0	genus		GQ353230	humpback_F287	0	species
GU571780	murre_P34	4	order		KF918918	rockfish_P294	3	genus		GQ353230	humpback_R437	0	species
GU571780	murre_R138	1	order		KF918918	rockfish_R344	1	genus		GQ353231	humpback_P362	1	species
GU571780	murre_F9	0	order		KF918918	rockfish_F169	0	genus		GQ353231	humpback_F287	0	species
GU571781	murre_P34	4	order		KF918919	rockfish_P294	4	genus		GQ353231	humpback_R437	0	species
GU571781	murre_R138	1	order		KF918919	rockfish_R344	1	genus		GQ353232	humpback_P362	1	species
GU571781	murre_F9	0	order		KF918919	rockfish_F169	0	genus		GQ353232	humpback_F287	0	species
GU571782	murre_P34	5	order		KF918920	rockfish_P294	3	genus		GQ353232	humpback_R437	0	species
GU571782	murre_R138	0	order		KF918920	rockfish_F169	0	genus		GQ353233	humpback_P362	1	species
GU571782	murre_F9	2	order		KF918920	rockfish_R344	1	genus		GQ353233	humpback_F287	0	species
GU571783	murre_P34	5	order		KF918921	rockfish_R344	1	genus		GQ353233	humpback_R437	0	species
GU571783	murre_R138	0	order		KF918921	rockfish_P294	3	genus		GQ353234	humpback_P362	0	species
GU571783	murre_F9	2	order		KF918921	rockfish_F169	0	genus		GQ353234	humpback_F287	0	species
GU571784	murre_P34	3	order		KF918922	rockfish_P294	4	genus		GQ353234	humpback_R437	0	species
GU571784	murre_R138	0	order		KF918922	rockfish_R344	1	genus		GQ353235	humpback_P362	0	species
GU571784	murre_F9	1	order		KF918922	rockfish_F169	0	genus		GQ353235	humpback_F287	0	species
GU571803	murre_P34	3	order		KF918923	rockfish_R344	1	genus		GQ353235	humpback_R437	0	species
GU571803	murre_R138	2	order		KF918923	rockfish_P294	4	genus		GQ353236	humpback_P362	0	species
GU571803	murre_F9	3	order		KF918923	rockfish_F169	0	genus		GQ353236	humpback_F287	0	species
GU571804	murre_P34	3	order		KF918924	rockfish_P294	5	genus		GQ353236	humpback_R437	0	species
GU571804	murre_R138	2	order		KF918924	rockfish_R344	1	genus		GQ353237	humpback_P362	1	species
GU571804	murre_F9	3	order		KF918924	rockfish_F169	0	genus		GQ353237	humpback_F287	0	species
GU571805	murre_P34	3	order		KF918925	rockfish_P294	4	genus		GQ353237	humpback_R437	0	species
GU571805	murre_R138	2	order		KF918925	rockfish_R344	1	genus		GQ353238	humpback_P362	0	species
GU571805	murre_F9	3	order		KF918925	rockfish_F169	1	genus		GQ353238	humpback_F287	0	species
GU571809	murre_P34	2	order		KF918926	rockfish_P294	4	genus		GQ353238	humpback_R437	0	species
GU571809	murre_R138	4	order		KF918926	rockfish_R344	1	genus		GQ353239	humpback_P362	1	species
GU571809	murre_F9	1	order		KF918926	rockfish_F169	1	genus		GQ353239	humpback_F287	0	species
GU571810	murre_P34	2	order		KF918927	rockfish_P294	3	genus		GQ353239	humpback_R437	0	species
GU571810	murre_R138	4	order		KF918927	rockfish_R344	1	genus		GQ353240	humpback_P362	0	species
GU571810	murre_F9	1	order		KF918927	rockfish_F169	0	genus		GQ353240	humpback_F287	0	species
GU571811	murre_P34	5	order		KF918928	rockfish_R344	1	genus		GQ353240	humpback_R437	0	species
GU571811	murre_R138	3	order		KF918928	rockfish_P294	3	genus		GQ353241	humpback_P362	0	species
GU571811	murre_F9	1	order		KF918928	rockfish_F169	0	genus		GQ353241	humpback_F287	0	species
GU571812	murre_P34	5	order		KF918929	rockfish_P294	3	genus		GQ353241	humpback_R437	0	species
GU571812	murre_R138	3	order		KF918929	rockfish_R344	1	genus		GQ353242	humpback_P362	1	species
GU571812	murre_F9	1	order		KF918929	rockfish_F169	0	genus		GQ353242	humpback_F287	0	species
GU571813	murre_R138	1	order		KF918930	rockfish_P294	3	genus		GQ353242	humpback_R437	0	species
GU571813	murre_F9	2	order		KF918930	rockfish_R344	1	genus		GQ353243	humpback_P362	0	species
GU571814	murre_R138	1	order		KF918930	rockfish_F169	0	genus		GQ353243	humpback_F287	0	species
GU571814	murre_F9	2	order		KF918931	rockfish_P294	3	genus		GQ353243	humpback_R437	0	species
GU571815	murre_P34	3	order		KF918931	rockfish_R344	1	genus		GQ353244	humpback_P362	0	species
GU571815	murre_R138	4	order		KF918931	rockfish_F169	0	genus		GQ353244	humpback_F287	0	species
GU571815	murre_F9	2	order		KF918932	rockfish_P294	3	genus		GQ353244	humpback_R437	0	species
GU571894	murre_P34	5	order		KF918932	rockfish_R344	1	genus		GQ353245	humpback_P362	1	species
GU571894	murre_R138	1	order		KF918932	rockfish_F169	0	genus		GQ353245	humpback_F287	0	species
GU571894	murre_F9	3	order		KF918933	rockfish_P294	3	genus		GQ353245	humpback_R437	0	species
GU571895	murre_P34	5	order		KF918933	rockfish_F169	0	genus		GQ353246	humpback_P362	0	species
GU571895	murre_R138	1	order		KF918933	rockfish_R344	1	genus		GQ353246	humpback_F287	0	species
GU571895	murre_F9	3	order		KF918934	rockfish_P294	3	genus		GQ353246	humpback_R437	0	species
GU571904	murre_P34	3	order		KF918934	rockfish_R344	1	genus		GQ353247	humpback_P362	0	species
GU571904	murre_R138	5	order		KF918934	rockfish_F169	0	genus		GQ353247	humpback_F287	0	species
GU571904	murre_F9	1	order		KF918935	rockfish_F169	0	genus		GQ353247	humpback_R437	0	species
GU571905	murre_R138	5	order		KF918935	rockfish_P294	3	genus		GQ353248	humpback_P362	0	species
GU571905	murre_F9	1	order		KF918935	rockfish_R344	2	genus		GQ353248	humpback_F287	0	species
GU571905	murre_P34	3	order		KF918936	rockfish_P294	3	genus		GQ353248	humpback_R437	0	species
GU572095	murre_P34	4	order		KF918936	rockfish_R344	1	genus		GQ353249	humpback_P362	0	species
GU572095	murre_R138	3	order		KF918936	rockfish_F169	0	genus		GQ353249	humpback_F287	0	species
GU572095	murre_F9	2	order		KF930398	rockfish_P294	4	genus		GQ353249	humpback_R437	0	species
HM033462	murre_F9	1	order		KF930398	rockfish_F169	0	genus		GQ353250	humpback_P362	1	species
HM033462	murre_R138	5	order		KF930398	rockfish_R344	1	genus		GQ353250	humpback_F287	0	species
HM033462	murre_P34	3	order		KF930399	rockfish_P294	3	genus		GQ353250	humpback_R437	0	species
JF498757	murre_R138	2	order		KF930399	rockfish_F169	0	genus		GQ353251	humpback_P362	0	species
JF498757	murre_P34	4	order		KF930399	rockfish_R344	1	genus		GQ353251	humpback_F287	0	species
JF498759	murre_R138	3	order		KF930400	rockfish_P294	4	genus		GQ353251	humpback_R437	0	species
JF498760	murre_F9	2	order		KF930400	rockfish_F169	0	genus		GQ353252	humpback_P362	0	species
JF498760	murre_R138	3	order		KF930400	rockfish_R344	1	genus		GQ353252	humpback_F287	0	species
JF498760	murre_P34	3	order		KF930401	rockfish_P294	4	genus		GQ353252	humpback_R437	0	species
JF498778	murre_P34	4	order		KF930401	rockfish_F169	0	genus		GQ353253	humpback_P362	0	species
JF498778	murre_R138	3	order		KF930401	rockfish_R344	2	genus		GQ353253	humpback_F287	0	species
JF499111	murre_F9	1	order		KF930402	rockfish_P294	4	genus		GQ353253	humpback_R437	0	species
JF499111	murre_R138	4	order		KF930402	rockfish_F169	0	genus		GQ913691	humpback_R437	0	species
JF499111	murre_P34	5	order		KF930402	rockfish_R344	2	genus		GQ913691	humpback_P362	0	species
JF499112	murre_F9	1	order		KF930403	rockfish_P294	3	genus		GQ913691	humpback_F287	0	species
JF499112	murre_R138	4	order		KF930403	rockfish_F169	0	genus		GQ913692	humpback_R437	0	species
JF499112	murre_P34	5	order		KF930403	rockfish_R344	1	genus		GQ913692	humpback_P362	0	species
JF499113	murre_P34	2	order		KF930404	rockfish_P294	3	genus		GQ913692	humpback_F287	0	species
JF499113	murre_R138	4	order		KF930404	rockfish_F169	0	genus		GQ913693	humpback_R437	0	species
JF499113	murre_F9	1	order		KF930404	rockfish_R344	0	genus		GQ913693	humpback_P362	0	species
JF499134	murre_F9	1	order		KF930405	rockfish_R344	1	genus		GQ913693	humpback_F287	0	species
JF499134	murre_R138	5	order		KF930405	rockfish_P294	3	genus		GQ913694	humpback_R437	0	species
JF499134	murre_P34	3	order		KF930405	rockfish_F169	0	genus		GQ913694	humpback_P362	0	species
JN801284	murre_F9	3	order		KF930406	rockfish_R344	1	genus		GQ913694	humpback_F287	0	species
JN801284	murre_R138	2	order		KF930406	rockfish_P294	3	genus		GQ913695	humpback_R437	0	species
JN801284	murre_P34	3	order		KF930406	rockfish_F169	0	genus		GQ913695	humpback_P362	1	species
JN801285	murre_F9	3	order		KF930407	rockfish_P294	5	genus		GQ913695	humpback_F287	0	species
JN801285	murre_R138	2	order		KF930407	rockfish_F169	0	genus		GQ913696	humpback_R437	0	species
JN801285	murre_P34	3	order		KF930408	rockfish_P294	3	genus		GQ913696	humpback_F287	0	species
JN801286	murre_R138	4	order		KF930408	rockfish_R344	1	genus		GQ913696	humpback_P362	0	species
JN801556	murre_P34	5	order		KF930408	rockfish_F169	0	genus		GQ913697	humpback_R437	0	species
JN801556	murre_R138	3	order		KJ443779	rockfish_P294	4	genus		GQ913697	humpback_P362	0	species
JN801556	murre_F9	1	order		KJ443779	rockfish_R344	1	genus		GQ913697	humpback_F287	0	species
JN850760	murre_F9	1	order		KJ443779	rockfish_F169	0	genus		GQ913698	humpback_R437	0	species
JN850760	murre_R138	2	order		KJ443780	rockfish_F169	0	genus		GQ913698	humpback_P362	0	species
JQ174202	murre_F9	1	order		KJ443780	rockfish_P294	4	genus		GQ913698	humpback_F287	1	species
JQ174202	murre_R138	2	order		KJ443780	rockfish_R344	1	genus		GQ913699	humpback_R437	0	species
JQ174202	murre_P34	5	order		KJ443781	rockfish_P294	3	genus		GQ913699	humpback_P362	0	species
JQ174203	murre_F9	1	order		KJ443781	rockfish_R344	1	genus		GQ913699	humpback_F287	0	species
JQ174203	murre_R138	2	order		KJ443781	rockfish_F169	0	genus		GQ913700	humpback_R437	0	species
JQ174203	murre_P34	4	order		KJ443782	rockfish_R344	1	genus		GQ913700	humpback_F287	0	species
JQ174235	murre_F9	2	order		KJ443782	rockfish_P294	4	genus		GQ913700	humpback_P362	0	species
JQ174235	murre_R138	2	order		KJ443782	rockfish_F169	0	genus		GQ913701	humpback_R437	0	species
JQ174235	murre_P34	1	order		KJ443783	rockfish_F169	1	genus		GQ913701	humpback_P362	0	species
JQ174903	murre_P34	5	order		KJ443783	rockfish_P294	3	genus		GQ913701	humpback_F287	0	species
JQ174903	murre_R138	3	order		KJ443783	rockfish_R344	1	genus		GQ913702	humpback_P362	0	species
JQ174903	murre_F9	2	order		KJ443784	rockfish_P294	3	genus		GQ913702	humpback_F287	0	species
JQ174904	murre_F9	0	order		KJ443784	rockfish_F169	0	genus		GQ913702	humpback_R437	0	species
JQ174904	murre_R138	4	order		KJ443784	rockfish_R344	1	genus		GQ913703	humpback_R437	0	species
JQ174904	murre_P34	4	order		KJ443785	rockfish_F169	0	genus		GQ913703	humpback_P362	0	species
JQ174905	murre_P34	5	order		KJ443785	rockfish_P294	3	genus		GQ913703	humpback_F287	0	species
JQ174905	murre_R138	2	order		KJ443785	rockfish_R344	1	genus		GQ913704	humpback_R437	0	species
JQ174906	murre_F9	1	order		KJ443786	rockfish_P294	3	genus		GQ913704	humpback_P362	0	species
JQ174906	murre_R138	2	order		KJ443786	rockfish_F169	0	genus		GQ913704	humpback_F287	0	species
JQ174906	murre_P34	5	order		KJ443786	rockfish_R344	1	genus		GQ913705	humpback_R437	0	species
JQ174907	murre_F9	1	order		KJ443787	rockfish_P294	3	genus		GQ913705	humpback_P362	0	species
JQ174907	murre_R138	2	order		KJ443787	rockfish_F169	0	genus		GQ913705	humpback_F287	1	species
JQ174969	murre_F9	2	order		KJ443787	rockfish_R344	1	genus		GQ913706	humpback_R437	0	species
JQ174969	murre_R138	2	order		KJ443788	rockfish_P294	3	genus		GQ913706	humpback_F287	0	species
JQ174969	murre_P34	3	order		KJ443788	rockfish_R344	2	genus		GQ913706	humpback_P362	0	species
JQ174970	murre_F9	2	order		KJ443788	rockfish_F169	0	genus		GQ913707	humpback_R437	0	species
JQ174970	murre_R138	3	order		KJ443789	rockfish_P294	3	genus		GQ913707	humpback_P362	0	species
JQ174970	murre_P34	2	order		KJ443789	rockfish_R344	2	genus		GQ913707	humpback_F287	0	species
JQ174971	murre_F9	2	order		KJ443789	rockfish_F169	0	genus		GQ913708	humpback_R437	0	species
JQ174971	murre_R138	2	order		KJ443790	rockfish_P294	3	genus		GQ913708	humpback_F287	0	species
JQ174971	murre_P34	3	order		KJ443790	rockfish_R344	2	genus		GQ913708	humpback_P362	0	species
JQ174972	murre_P34	2	order		KJ443790	rockfish_F169	0	genus		GQ913709	humpback_R437	0	species
JQ174972	murre_R138	2	order		KJ443791	rockfish_P294	3	genus		GQ913709	humpback_F287	0	species
JQ174973	murre_F9	2	order		KJ443791	rockfish_F169	0	genus		GQ913709	humpback_P362	0	species
JQ174973	murre_R138	2	order		KJ443791	rockfish_R344	2	genus		GQ913710	humpback_R437	0	species
JQ174973	murre_P34	2	order		KJ443792	rockfish_P294	3	genus		GQ913710	humpback_F287	0	species
JQ174974	murre_F9	2	order		KJ443792	rockfish_R344	1	genus		GQ913710	humpback_P362	0	species
JQ174974	murre_R138	2	order		KJ443792	rockfish_F169	0	genus		GQ913711	humpback_R437	0	species
JQ174974	murre_P34	2	order		KJ443793	rockfish_P294	3	genus		GQ913711	humpback_F287	1	species
JQ251199	murre_R138	1	order		KJ443793	rockfish_F169	0	genus		GQ913711	humpback_P362	0	species
JQ251200	murre_R138	1	order		KJ443793	rockfish_R344	1	genus		GQ913712	humpback_R437	0	species
JQ251200	murre_P34	4	order		KJ443794	rockfish_P294	3	genus		GQ913712	humpback_F287	0	species
JQ251201	murre_R138	1	order		KJ443794	rockfish_R344	1	genus		GQ913712	humpback_P362	0	species
JQ251201	murre_P34	4	order		KJ443794	rockfish_F169	0	genus		GQ913713	humpback_R437	0	species
JQ251202	murre_R138	1	order		KJ492276	rockfish_P294	3	genus		GQ913713	humpback_F287	0	species
JQ251202	murre_P34	4	order		KJ492276	rockfish_R344	1	genus		GQ913713	humpback_P362	0	species
JQ251203	murre_R138	1	order		KJ492276	rockfish_F169	0	genus		GQ913714	humpback_R437	0	species
JQ251203	murre_P34	4	order		KJ492277	rockfish_R344	1	genus		GQ913714	humpback_P362	0	species
JQ251204	murre_R138	1	order		KJ492277	rockfish_P294	3	genus		GQ913714	humpback_F287	0	species
JQ251204	murre_P34	4	order		KJ492277	rockfish_F169	0	genus		GQ913715	humpback_R437	0	species
JQ251205	murre_R138	1	order		KJ492278	rockfish_P294	3	genus		GQ913715	humpback_F287	0	species
JQ251205	murre_P34	4	order		KJ492278	rockfish_R344	1	genus		GQ913715	humpback_P362	0	species
JQ251206	murre_R138	1	order		KJ492278	rockfish_F169	0	genus		GQ913716	humpback_R437	0	species
JQ251206	murre_P34	4	order		KJ492279	rockfish_P294	3	genus		GQ913716	humpback_F287	0	species
JQ251207	murre_R138	1	order		KJ492279	rockfish_F169	0	genus		GQ913716	humpback_P362	0	species
JQ251207	murre_P34	4	order		KJ492279	rockfish_R344	1	genus		GQ913717	humpback_R437	1	species
JQ251208	murre_R138	1	order		KM019220	rockfish_P294	3	genus		GQ913717	humpback_P362	0	species
JQ251208	murre_P34	4	order		KM019220	rockfish_R344	0	genus		GQ913717	humpback_F287	0	species
JQ251209	murre_R138	1	order		KM019220	rockfish_F169	0	genus		GQ913718	humpback_R437	0	species
JQ251209	murre_P34	4	order		KM019315	rockfish_R344	2	genus		GQ913718	humpback_P362	0	species
JQ251210	murre_R138	1	order		KM019315	rockfish_P294	3	genus		GQ913718	humpback_F287	0	species
JQ251210	murre_P34	4	order		KM019315	rockfish_F169	0	genus		GQ913719	humpback_R437	0	species
JQ251211	murre_R138	1	order		KM019321	rockfish_F169	0	genus		GQ913719	humpback_P362	0	species
JQ251211	murre_P34	4	order		KM019321	rockfish_P294	3	genus		GQ913719	humpback_F287	0	species
JQ251212	murre_R138	1	order		KM019321	rockfish_R344	2	genus		GQ913720	humpback_R437	0	species
JQ251212	murre_P34	4	order		KM019402	rockfish_R344	1	genus		GQ913720	humpback_P362	0	species
JQ251227	murre_R138	2	order		KM019402	rockfish_P294	4	genus		GQ913720	humpback_F287	0	species
JQ251227	murre_P34	2	order		KM019402	rockfish_F169	0	genus		GQ913721	humpback_R437	0	species
JQ251228	murre_R138	1	order		KM019405	rockfish_P294	3	genus		GQ913721	humpback_P362	1	species
JQ251228	murre_P34	2	order		KM019405	rockfish_F169	0	genus		GQ913721	humpback_F287	0	species
JQ251229	murre_R138	1	order		KM019405	rockfish_R344	1	genus		GQ913722	humpback_R437	0	species
JQ251229	murre_P34	2	order		KM019406	rockfish_P294	3	genus		GQ913722	humpback_F287	0	species
JQ251230	murre_R138	1	order		KM019406	rockfish_R344	1	genus		GQ913722	humpback_P362	0	species
JQ251230	murre_P34	2	order		KM019406	rockfish_F169	0	genus		GQ913723	humpback_R437	0	species
JQ251231	murre_R138	1	order		KM019408	rockfish_P294	3	genus		GQ913723	humpback_F287	0	species
JQ251231	murre_P34	2	order		KM019408	rockfish_R344	1	genus		GQ913723	humpback_P362	0	species
JQ251232	murre_R138	1	order		KM019408	rockfish_F169	0	genus		GQ913724	humpback_R437	0	species
JQ251232	murre_P34	2	order		KM019409	rockfish_R344	1	genus		GQ913724	humpback_F287	0	species
JQ251233	murre_R138	1	order		KM019409	rockfish_P294	3	genus		GQ913724	humpback_P362	1	species
JQ251233	murre_P34	2	order		KM019409	rockfish_F169	0	genus		GQ913725	humpback_R437	0	species
JQ251234	murre_R138	1	order		KM019410	rockfish_R344	1	genus		GQ913725	humpback_P362	1	species
JQ251234	murre_P34	2	order		KM019410	rockfish_P294	3	genus		GQ913725	humpback_F287	0	species
JQ251235	murre_R138	1	order		KM019410	rockfish_F169	0	genus		GQ913726	humpback_R437	0	species
JQ251235	murre_P34	2	order		KM019411	rockfish_F169	0	genus		GQ913726	humpback_P362	0	species
JQ251236	murre_R138	1	order		KM019411	rockfish_P294	3	genus		GQ913726	humpback_F287	0	species
JQ251236	murre_P34	2	order		KM019411	rockfish_R344	1	genus		GQ913727	humpback_R437	0	species
JQ251237	murre_R138	1	order		KM019416	rockfish_P294	4	genus		GQ913727	humpback_P362	0	species
JQ251237	murre_P34	2	order		KM019416	rockfish_R344	1	genus		GQ913727	humpback_F287	1	species
JQ251238	murre_R138	1	order		KM019416	rockfish_F169	0	genus		GQ913728	humpback_R437	0	species
JQ251238	murre_P34	2	order		KM019417	rockfish_P294	4	genus		GQ913728	humpback_P362	0	species
JQ251239	murre_R138	1	order		KM019417	rockfish_R344	1	genus		GQ913728	humpback_F287	0	species
JQ251239	murre_P34	2	order		KM019417	rockfish_F169	0	genus		GQ913729	humpback_R437	0	species
JQ251240	murre_R138	3	order		KM019418	rockfish_P294	3	genus		GQ913729	humpback_F287	0	species
JQ251240	murre_P34	4	order		KM019418	rockfish_F169	0	genus		GQ913729	humpback_P362	1	species
JQ251241	murre_R138	3	order		KM019418	rockfish_R344	1	genus		GQ913730	humpback_R437	0	species
JQ251241	murre_P34	4	order		KM019419	rockfish_P294	3	genus		GQ913730	humpback_P362	0	species
JQ251242	murre_R138	3	order		KM019419	rockfish_R344	0	genus		GQ913730	humpback_F287	0	species
JQ251242	murre_P34	4	order		KM019419	rockfish_F169	0	genus		GQ913731	humpback_R437	0	species
JQ251243	murre_R138	3	order		KM019420	rockfish_F169	0	genus		GQ913731	humpback_F287	0	species
JQ251243	murre_P34	4	order		KM019420	rockfish_P294	3	genus		GQ913731	humpback_P362	1	species
JQ251244	murre_R138	3	order		KM019420	rockfish_R344	0	genus		GQ913732	humpback_R437	0	species
JQ251244	murre_P34	4	order		KM019421	rockfish_P294	3	genus		GQ913732	humpback_P362	0	species
JQ251245	murre_R138	3	order		KM019421	rockfish_F169	0	genus		GQ913732	humpback_F287	0	species
JQ251245	murre_P34	4	order		KM019421	rockfish_R344	0	genus		GQ913733	humpback_R437	0	species
JQ251246	murre_R138	3	order		KM019422	rockfish_F169	0	genus		GQ913733	humpback_P362	0	species
JQ251246	murre_P34	4	order		KM019422	rockfish_P294	3	genus		GQ913733	humpback_F287	0	species
JQ251247	murre_R138	3	order		KM019422	rockfish_R344	0	genus		GQ913734	humpback_R437	0	species
JQ251247	murre_P34	4	order		KM019423	rockfish_R344	1	genus		GQ913734	humpback_P362	0	species
JQ251248	murre_R138	3	order		KM019423	rockfish_P294	3	genus		GQ913734	humpback_F287	0	species
JQ251248	murre_P34	4	order		KM019423	rockfish_F169	1	genus		GQ913735	humpback_R437	0	species
JQ251249	murre_R138	3	order		KM019424	rockfish_R344	1	genus		GQ913735	humpback_F287	0	species
JQ251249	murre_P34	4	order		KM019424	rockfish_F169	0	genus		GQ913735	humpback_P362	1	species
JQ251250	murre_R138	3	order		KM019424	rockfish_P294	3	genus		GQ913736	humpback_R437	0	species
JQ251250	murre_P34	4	order		KM019425	rockfish_P294	3	genus		GQ913736	humpback_P362	0	species
JQ251251	murre_R138	3	order		KM019425	rockfish_F169	0	genus		GQ913736	humpback_F287	0	species
JQ251251	murre_P34	4	order		KM019425	rockfish_R344	1	genus		GQ913737	humpback_R437	0	species
JQ251252	murre_R138	2	order		KM019428	rockfish_F169	0	genus		GQ913737	humpback_F287	0	species
JQ251252	murre_P34	3	order		KM019428	rockfish_P294	3	genus		GQ913737	humpback_P362	0	species
JQ251253	murre_R138	2	order		KM019428	rockfish_R344	2	genus		GQ913738	humpback_R437	0	species
JQ251253	murre_P34	3	order		KM019429	rockfish_P294	3	genus		GQ913738	humpback_F287	0	species
JQ251254	murre_R138	2	order		KM019429	rockfish_R344	2	genus		GQ913738	humpback_P362	0	species
JQ251254	murre_P34	3	order		KM019429	rockfish_F169	0	genus		GQ913739	humpback_R437	0	species
JQ251255	murre_R138	2	order		KM019431	rockfish_R344	2	genus		GQ913739	humpback_P362	0	species
JQ251255	murre_P34	3	order		KM019431	rockfish_F169	0	genus		GQ913739	humpback_F287	0	species
JQ251256	murre_R138	2	order		KM019431	rockfish_P294	3	genus		GQ913740	humpback_R437	0	species
JQ251256	murre_P34	3	order		KM019432	rockfish_F169	0	genus		GQ913740	humpback_F287	0	species
JQ251257	murre_R138	2	order		KM019432	rockfish_P294	3	genus		GQ913740	humpback_P362	0	species
JQ251257	murre_P34	3	order		KM019432	rockfish_R344	1	genus		GQ913741	humpback_R437	0	species
JQ251258	murre_R138	2	order		KM019433	rockfish_P294	3	genus		GQ913741	humpback_P362	0	species
JQ251258	murre_P34	3	order		KM019433	rockfish_R344	1	genus		GQ913741	humpback_F287	0	species
JQ251259	murre_R138	2	order		KM019433	rockfish_F169	0	genus		GQ913742	humpback_R437	0	species
JQ251259	murre_P34	3	order		KM019434	rockfish_F169	0	genus		GQ913742	humpback_P362	0	species
JQ251260	murre_R138	2	order		KM019434	rockfish_P294	3	genus		GQ913742	humpback_F287	0	species
JQ251260	murre_P34	3	order		KM019434	rockfish_R344	1	genus		GQ913743	humpback_R437	0	species
JQ251261	murre_R138	2	order		KM019435	rockfish_P294	3	genus		GQ913743	humpback_P362	0	species
JQ251261	murre_P34	3	order		KM019435	rockfish_R344	1	genus		GQ913743	humpback_F287	0	species
JQ251262	murre_R138	2	order		KM019435	rockfish_F169	0	genus		GQ913744	humpback_P362	0	species
JQ251262	murre_P34	3	order		KM019436	rockfish_F169	0	genus		GQ913744	humpback_F287	0	species
JQ251263	murre_R138	2	order		KM019436	rockfish_P294	3	genus		GQ913744	humpback_R437	0	species
JQ251263	murre_P34	3	order		KM019436	rockfish_R344	2	genus		GQ913745	humpback_R437	0	species
JQ251264	murre_R138	2	order		KM019437	rockfish_R344	2	genus		GQ913745	humpback_P362	1	species
JQ251264	murre_P34	3	order		KM019437	rockfish_P294	3	genus		GQ913745	humpback_F287	0	species
KC812720	murre_R138	1	order		KM019437	rockfish_F169	0	genus		GQ913746	humpback_R437	0	species
KC812720	murre_F9	1	order		KM019438	rockfish_P294	3	genus		GQ913746	humpback_F287	0	species
KC812720	murre_P34	3	order		KM019438	rockfish_F169	0	genus		GQ913746	humpback_P362	0	species
KC812721	murre_F9	3	order		KM019438	rockfish_R344	2	genus		GQ913747	humpback_R437	0	species
KC812721	murre_R138	1	order		KM019439	rockfish_P294	3	genus		GQ913747	humpback_P362	1	species
KC812721	murre_P34	3	order		KM019439	rockfish_F169	0	genus		GQ913747	humpback_F287	0	species
KC812722	murre_F9	3	order		KM019439	rockfish_R344	1	genus		GQ913748	humpback_F287	0	species
KC812722	murre_R138	1	order		KM019440	rockfish_P294	3	genus		GQ913748	humpback_R437	0	species
KC812722	murre_P34	3	order		KM019440	rockfish_F169	0	genus		GQ913748	humpback_P362	0	species
KC812723	murre_F9	1	order		KM019440	rockfish_R344	1	genus		GQ913749	humpback_R437	0	species
KC812723	murre_R138	1	order		KM019441	rockfish_P294	3	genus		GQ913749	humpback_F287	0	species
KC812723	murre_P34	3	order		KM019441	rockfish_F169	0	genus		GQ913749	humpback_P362	0	species
KC812724	murre_P34	3	order		KM019441	rockfish_R344	1	genus		GQ913750	humpback_R437	0	species
KC812724	murre_R138	1	order		KM019442	rockfish_P294	3	genus		GQ913750	humpback_P362	0	species
KC812725	murre_P34	3	order		KM019442	rockfish_F169	0	genus		GQ913750	humpback_F287	0	species
KC812725	murre_R138	1	order		KM019442	rockfish_R344	2	genus		GQ913751	humpback_R437	0	species
KC812725	murre_F9	1	order		KM019443	rockfish_F169	0	genus		GQ913751	humpback_P362	0	species
KF009517	murre_F9	5	order		KM019443	rockfish_P294	3	genus		GQ913751	humpback_F287	0	species
KF009517	murre_P34	3	order		KM019443	rockfish_R344	1	genus		GQ913752	humpback_R437	0	species
KF009517	murre_R138	2	order		KM019444	rockfish_P294	3	genus		GQ913752	humpback_F287	0	species
KF009517	murre_F9	0	order		KM019444	rockfish_F169	0	genus		GQ913752	humpback_P362	0	species
KF009518	murre_P34	4	order		KM019444	rockfish_R344	2	genus		GQ913753	humpback_R437	0	species
KF009518	murre_R138	0	order		KM019445	rockfish_F169	0	genus		GQ913753	humpback_P362	1	species
KF009518	murre_F9	1	order		KM019445	rockfish_P294	3	genus		GQ913753	humpback_F287	0	species
KF009519	murre_P34	5	order		KM019445	rockfish_R344	2	genus		GQ913754	humpback_R437	0	species
KF009519	murre_R138	1	order		KM019446	rockfish_P294	3	genus		GQ913754	humpback_P362	0	species
KF009519	murre_F9	1	order		KM019446	rockfish_R344	2	genus		GQ913754	humpback_F287	0	species
KF009520	murre_P34	3	order		KM019446	rockfish_F169	0	genus		GQ913755	humpback_R437	0	species
KF009520	murre_R138	2	order		KM019447	rockfish_P294	3	genus		GQ913755	humpback_F287	0	species
KF009520	murre_F9	1	order		KM019447	rockfish_F169	0	genus		GQ913755	humpback_P362	0	species
KF009521	murre_P34	4	order		KM019447	rockfish_R344	2	genus		GQ913756	humpback_R437	0	species
KF009521	murre_R138	1	order		KM019448	rockfish_P294	3	genus		GQ913756	humpback_P362	0	species
KF009521	murre_F9	0	order		KM019448	rockfish_F169	0	genus		GQ913756	humpback_F287	0	species
KF009522	murre_R138	1	order		KM019448	rockfish_R344	2	genus		GQ913757	humpback_R437	0	species
KF009522	murre_F9	2	order		KM019449	rockfish_P294	3	genus		GQ913757	humpback_F287	0	species
KF009522	murre_P34	4	order		KM019449	rockfish_F169	0	genus		GQ913757	humpback_P362	0	species
KF009524	murre_R138	2	order		KM019449	rockfish_R344	1	genus		GQ913758	humpback_R437	0	species
KF009524	murre_P34	3	order		KM019450	rockfish_P294	3	genus		GQ913758	humpback_F287	0	species
KF009525	murre_P34	5	order		KM019450	rockfish_R344	1	genus		GQ913758	humpback_P362	0	species
KF009525	murre_R138	0	order		KM019450	rockfish_F169	0	genus		GQ913759	humpback_R437	0	species
KF009525	murre_F9	2	order		KM019451	rockfish_P294	3	genus		GQ913759	humpback_P362	0	species
KF009526	murre_R138	2	order		KM019451	rockfish_R344	2	genus		GQ913759	humpback_F287	0	species
KF009526	murre_F9	3	order		KM019451	rockfish_F169	0	genus		GQ913760	humpback_R437	0	species
KF009526	murre_P34	3	order		KM019452	rockfish_R344	2	genus		GQ913760	humpback_P362	0	species
KF009527	murre_P34	1	order		KM019452	rockfish_P294	3	genus		GQ913760	humpback_F287	0	species
KF009527	murre_R138	2	order		KM019452	rockfish_F169	0	genus		GQ913761	humpback_R437	0	species
KF009527	murre_F9	2	order		KM019453	rockfish_P294	3	genus		GQ913761	humpback_F287	0	species
KF009528	murre_R138	1	order		KM019453	rockfish_R344	1	genus		GQ913761	humpback_P362	0	species
KF009528	murre_P34	5	order		KM019453	rockfish_F169	0	genus		GQ913762	humpback_R437	0	species
KF009529	murre_R138	0	order		KM019454	rockfish_R344	2	genus		GQ913762	humpback_P362	0	species
KF009530	murre_P34	4	order		KM019454	rockfish_P294	3	genus		GQ913762	humpback_F287	0	species
KF009530	murre_R138	3	order		KM019454	rockfish_F169	0	genus		GQ913763	humpback_R437	0	species
KF009530	murre_F9	2	order		KM019455	rockfish_P294	3	genus		GQ913763	humpback_P362	0	species
KF009531	murre_R138	2	order		KM019455	rockfish_F169	0	genus		GQ913763	humpback_F287	0	species
KF009531	murre_F9	2	order		KM019455	rockfish_R344	1	genus		GQ913764	humpback_R437	0	species
KF009532	murre_P34	5	order		KM019456	rockfish_F169	0	genus		GQ913764	humpback_P362	0	species
KF009532	murre_R138	2	order		KM019456	rockfish_P294	3	genus		GQ913764	humpback_F287	0	species
KF009532	murre_F9	2	order		KM019456	rockfish_R344	1	genus		GQ913765	humpback_R437	0	species
KF009533	murre_F9	3	order		KM019458	rockfish_R344	2	genus		GQ913765	humpback_P362	0	species
KF009533	murre_P34	5	order		KM019458	rockfish_F169	0	genus		GQ913765	humpback_F287	0	species
KF009533	murre_R138	2	order		KM019458	rockfish_P294	3	genus		GQ913766	humpback_R437	0	species
KF009534	murre_R138	2	order		KM019459	rockfish_R344	2	genus		GQ913766	humpback_P362	0	species
KF009534	murre_F9	1	order		KM019459	rockfish_F169	0	genus		GQ913766	humpback_F287	0	species
KF009534	murre_P34	4	order		KM019459	rockfish_P294	3	genus		GQ913767	humpback_R437	0	species
KF009535	murre_R138	3	order		KM019460	rockfish_R344	1	genus		GQ913767	humpback_F287	0	species
KF009535	murre_F9	2	order		KM019460	rockfish_F169	0	genus		GQ913767	humpback_P362	0	species
KF009535	murre_P34	5	order		KM019460	rockfish_P294	3	genus		GQ913768	humpback_F287	0	species
KF147196	murre_R138	2	order		KM019461	rockfish_P294	3	genus		GQ913768	humpback_P362	0	species
KF147196	murre_F9	2	order		KM019461	rockfish_F169	0	genus		GQ913768	humpback_R437	0	species
KF446124	murre_P34	4	order		KM019461	rockfish_R344	1	genus		GQ913769	humpback_R437	0	species
KF446124	murre_R138	2	order		KM019462	rockfish_P294	3	genus		GQ913769	humpback_P362	0	species
KF446125	murre_R138	2	order		KM019462	rockfish_F169	0	genus		GQ913769	humpback_F287	0	species
KF446125	murre_P34	4	order		KM019462	rockfish_R344	1	genus		GQ913770	humpback_R437	0	species
KF946614	murre_R138	2	order		KM019463	rockfish_P294	3	genus		GQ913770	humpback_P362	0	species
KF946614	murre_F9	1	order		KM019463	rockfish_F169	0	genus		GQ913770	humpback_F287	0	species
KF946614	murre_P34	3	order		KM019463	rockfish_R344	1	genus		GQ913771	humpback_R437	0	species
KF946637	murre_R138	3	order		KM019464	rockfish_R344	1	genus		GQ913771	humpback_F287	0	species
KF946637	murre_F9	1	order		KM019464	rockfish_F169	0	genus		GQ913771	humpback_P362	0	species
KF946637	murre_P34	5	order		KM019464	rockfish_P294	3	genus		GQ913772	humpback_R437	0	species
KF946684	murre_R138	1	order		KM019465	rockfish_P294	3	genus		GQ913772	humpback_P362	0	species
KF946684	murre_F9	3	order		KM019465	rockfish_R344	2	genus		GQ913772	humpback_F287	0	species
KF946684	murre_P34	5	order		KM019465	rockfish_F169	0	genus		GQ913773	humpback_R437	0	species
KF946685	murre_R138	1	order		KM019466	rockfish_P294	1	genus		GQ913773	humpback_P362	0	species
KF946685	murre_F9	3	order		KM019466	rockfish_R344	1	genus		GQ913773	humpback_F287	0	species
KF946685	murre_P34	5	order		KM019466	rockfish_F169	1	genus		GQ913774	humpback_P362	1	species
KF946686	murre_R138	1	order		KM019467	rockfish_F169	1	genus		GQ913774	humpback_F287	0	species
KF946686	murre_F9	3	order		KM019467	rockfish_P294	1	genus		GQ913774	humpback_R437	0	species
KF946686	murre_P34	5	order		KM019467	rockfish_R344	1	genus		GQ913775	humpback_F287	1	species
KM001257	murre_R138	4	order		KM019468	rockfish_P294	1	genus		GQ913775	humpback_P362	0	species
KM001257	murre_P34	5	order		KM019468	rockfish_F169	1	genus		GQ913775	humpback_R437	0	species
KM001258	murre_R138	4	order		KM019468	rockfish_R344	1	genus		GQ913776	humpback_P362	0	species
KM001258	murre_P34	5	order		KM077537	rockfish_P294	3	genus		GQ913776	humpback_F287	0	species
KM001259	murre_R138	4	order		KM077537	rockfish_R344	1	genus		GQ913776	humpback_R437	0	species
KM001259	murre_P34	5	order		KM077537	rockfish_F169	0	genus		GQ913777	humpback_R437	0	species
KM001266	murre_R138	3	order		KM077538	rockfish_P294	3	genus		GQ913777	humpback_P362	0	species
KM001267	murre_P34	5	order		KM077538	rockfish_F169	0	genus		GQ913777	humpback_F287	0	species
KM001267	murre_R138	3	order		KM077538	rockfish_R344	1	genus		GQ913778	humpback_R437	0	species
KM001268	murre_R138	4	order		KM077539	rockfish_P294	3	genus		GQ913778	humpback_P362	1	species
KM001268	murre_P34	2	order		KM077539	rockfish_R344	2	genus		GQ913778	humpback_F287	0	species
KM001269	murre_R138	4	order		KM077539	rockfish_F169	0	genus		GQ913779	humpback_R437	0	species
KM001269	murre_P34	2	order		KM893976	rockfish_P294	3	genus		GQ913779	humpback_P362	0	species
KM001270	murre_P34	2	order		KM893976	rockfish_F169	0	genus		GQ913779	humpback_F287	0	species
KM001270	murre_R138	4	order		KM893976	rockfish_R344	0	genus		GQ913780	humpback_R437	0	species
KM001274	murre_R138	4	order		KM893977	rockfish_R344	0	genus		GQ913780	humpback_F287	0	species
KM001274	murre_P34	5	order		KM893977	rockfish_P294	3	genus		GQ913780	humpback_P362	0	species
KM001275	murre_R138	4	order		KM893977	rockfish_F169	0	genus		GQ913781	humpback_P362	0	species
KM001275	murre_P34	5	order		KP641536	rockfish_P294	4	genus		GQ913781	humpback_F287	0	species
KM001276	murre_R138	4	order		KP641536	rockfish_F169	0	genus		GQ913781	humpback_R437	0	species
KM001276	murre_P34	5	order		KP641536	rockfish_R344	1	genus		GQ913782	humpback_R437	0	species
KM001277	murre_R138	4	order		KP641537	rockfish_P294	4	genus		GQ913782	humpback_F287	0	species
KM001278	murre_R138	4	order		KP641537	rockfish_F169	0	genus		GQ913782	humpback_P362	0	species
KM001279	murre_R138	4	order		KP641537	rockfish_R344	1	genus		GQ913783	humpback_R437	0	species
KM001281	murre_R138	3	order		KP641538	rockfish_P294	4	genus		GQ913783	humpback_P362	0	species
KM001282	murre_R138	3	order		KP641538	rockfish_F169	0	genus		GQ913783	humpback_F287	0	species
KM001283	murre_R138	3	order		KP641538	rockfish_R344	1	genus		GQ913784	humpback_F287	1	species
KM001283	murre_P34	4	order		KP641539	rockfish_P294	4	genus		GQ913785	humpback_F287	0	species
KM001284	murre_R138	3	order		KP641539	rockfish_F169	0	genus		GQ913786	humpback_F287	0	species
KM001284	murre_P34	4	order		KP641539	rockfish_R344	1	genus		GQ913787	humpback_F287	0	species
KM001285	murre_P34	4	order		KP641540	rockfish_P294	4	genus		GQ913788	humpback_F287	0	species
KM001285	murre_R138	3	order		KP641540	rockfish_F169	0	genus		GQ913789	humpback_F287	0	species
KM001286	murre_R138	4	order		KP641540	rockfish_R344	1	genus		GQ913790	humpback_F287	0	species
KM001286	murre_P34	3	order		KP641541	rockfish_P294	4	genus		GQ913791	humpback_F287	0	species
KM001287	murre_R138	4	order		KP641541	rockfish_F169	0	genus		GQ913792	humpback_F287	0	species
KM001287	murre_P34	3	order		KP641541	rockfish_R344	1	genus		GQ913793	humpback_F287	1	species
KM001288	murre_R138	4	order		KP641542	rockfish_P294	4	genus		GQ913794	humpback_F287	0	species
KM001288	murre_P34	3	order		KP641542	rockfish_F169	0	genus		GQ913795	humpback_F287	2	species
KM001292	murre_R138	3	order		KP641542	rockfish_R344	1	genus		GQ913796	humpback_F287	0	species
KM001292	murre_P34	5	order		KP641543	rockfish_P294	4	genus		GQ913797	humpback_F287	0	species
KM001293	murre_R138	3	order		KP641543	rockfish_F169	0	genus		GQ913798	humpback_F287	1	species
KM001293	murre_P34	5	order		KP641543	rockfish_R344	1	genus		GQ913799	humpback_F287	0	species
KM001294	murre_R138	3	order		KT247688	rockfish_P294	4	genus		GQ913800	humpback_F287	1	species
KM001294	murre_P34	5	order		KT247688	rockfish_F169	0	genus		GQ913801	humpback_F287	0	species
KM001295	murre_R138	4	order		KT247688	rockfish_R344	1	genus		GQ913802	humpback_R437	0	species
KM001295	murre_P34	5	order		KT247713	rockfish_P294	3	genus		GQ913802	humpback_P362	0	species
KM001296	murre_R138	4	order		KT247713	rockfish_R344	1	genus		GQ913802	humpback_F287	0	species
KM001296	murre_P34	5	order		KT247713	rockfish_F169	0	genus		GQ913803	humpback_R437	0	species
KM001297	murre_R138	4	order		KT247750	rockfish_P294	3	genus		GQ913803	humpback_F287	0	species
KM001297	murre_P34	5	order		KT247750	rockfish_F169	0	genus		GQ913803	humpback_P362	0	species
KM001307	murre_R138	3	order		KT247750	rockfish_R344	1	genus		GQ913804	humpback_R437	0	species
KM001308	murre_R138	3	order		KT247751	rockfish_P294	3	genus		GQ913804	humpback_P362	1	species
KM001309	murre_R138	3	order		KT247751	rockfish_F169	0	genus		GQ913804	humpback_F287	0	species
KM001310	murre_R138	4	order		KT247751	rockfish_R344	1	genus		GQ913805	humpback_R437	0	species
KM001310	murre_P34	5	order		KT247752	rockfish_P294	3	genus		GQ913805	humpback_P362	0	species
KM001311	murre_R138	4	order		KT247752	rockfish_F169	0	genus		GQ913805	humpback_F287	0	species
KM001311	murre_P34	5	order		KT247752	rockfish_R344	1	genus		GQ913806	humpback_R437	0	species
KM001312	murre_R138	4	order		KT247753	rockfish_R344	1	genus		GQ913806	humpback_P362	0	species
KM001312	murre_P34	5	order		KT247753	rockfish_F169	0	genus		GQ913806	humpback_F287	0	species
KM001313	murre_R138	4	order		KT247753	rockfish_P294	4	genus		GQ913807	humpback_R437	0	species
KM001314	murre_R138	4	order		KT247754	rockfish_P294	4	genus		GQ913807	humpback_P362	0	species
KM001315	murre_R138	4	order		KT247754	rockfish_R344	1	genus		GQ913807	humpback_F287	0	species
KM001316	murre_R138	3	order		KT247754	rockfish_F169	0	genus		GQ913808	humpback_R437	0	species
KM001316	murre_P34	5	order		KT247755	rockfish_P294	4	genus		GQ913808	humpback_F287	0	species
KM001317	murre_R138	3	order		KT247755	rockfish_R344	1	genus		GQ913808	humpback_P362	0	species
KM001317	murre_P34	5	order		KT247755	rockfish_F169	0	genus		GQ913809	humpback_R437	0	species
KM001318	murre_R138	3	order		KT247756	rockfish_P294	4	genus		GQ913809	humpback_P362	0	species
KM001318	murre_P34	5	order		KT247756	rockfish_F169	0	genus		GQ913809	humpback_F287	0	species
KM001322	murre_R138	4	order		KT247756	rockfish_R344	1	genus		GQ913810	humpback_R437	0	species
KM001322	murre_P34	2	order		KT247757	rockfish_P294	4	genus		GQ913810	humpback_F287	0	species
KM001323	murre_R138	4	order		KT247757	rockfish_R344	1	genus		GQ913810	humpback_P362	0	species
KM001323	murre_P34	2	order		KT247757	rockfish_F169	0	genus		GQ913811	humpback_R437	0	species
KM001324	murre_R138	4	order		KT247758	rockfish_P294	4	genus		GQ913811	humpback_P362	0	species
KM001324	murre_P34	2	order		KT247758	rockfish_F169	0	genus		GQ913811	humpback_F287	0	species
KM001336	murre_R138	2	order		KT247759	rockfish_P294	4	genus		GQ913812	humpback_R437	0	species
KM001337	murre_R138	2	order		KT247759	rockfish_R344	1	genus		GQ913812	humpback_F287	0	species
KM001338	murre_R138	2	order		KT247759	rockfish_F169	0	genus		GQ913812	humpback_P362	0	species
KM001339	murre_R138	3	order		KT247760	rockfish_P294	4	genus		GQ913813	humpback_R437	0	species
KM001340	murre_R138	3	order		KT247760	rockfish_R344	1	genus		GQ913813	humpback_F287	0	species
KM001341	murre_R138	3	order		KT247760	rockfish_F169	0	genus		GQ913813	humpback_P362	0	species
KM894279	murre_F9	0	order		KT247761	rockfish_P294	4	genus		GQ913814	humpback_R437	0	species
KM894279	murre_P34	3	order		KT247761	rockfish_R344	1	genus		GQ913814	humpback_F287	0	species
KM894279	murre_F9	5	order		KT247761	rockfish_F169	0	genus		GQ913814	humpback_P362	0	species
KM894279	murre_R138	2	order		KT247762	rockfish_P294	3	genus		GQ913815	humpback_R437	0	species
KM894289	murre_F9	2	order		KT247762	rockfish_F169	0	genus		GQ913815	humpback_P362	0	species
KM894289	murre_R138	3	order		KT247762	rockfish_R344	0	genus		GQ913815	humpback_F287	0	species
KM894289	murre_P34	4	order		KT247763	rockfish_P294	3	genus		GQ913816	humpback_R437	0	species
KM894290	murre_F9	2	order		KT247763	rockfish_F169	0	genus		GQ913816	humpback_F287	0	species
KM894290	murre_R138	3	order		KT247763	rockfish_R344	1	genus		GQ913816	humpback_P362	0	species
KM894290	murre_P34	4	order		KT247764	rockfish_P294	2	genus		GQ913817	humpback_P362	0	species
KM894291	murre_F9	2	order		KT247764	rockfish_F169	0	genus		GQ913817	humpback_F287	0	species
KM894291	murre_R138	3	order		KT247764	rockfish_R344	1	genus		GQ913817	humpback_R437	0	species
KM894291	murre_P34	4	order		KT247765	rockfish_P294	3	genus		GQ913818	humpback_R437	0	species
KM894292	murre_F9	2	order		KT247765	rockfish_R344	2	genus		GQ913818	humpback_P362	0	species
KM894292	murre_R138	3	order		KT247765	rockfish_F169	0	genus		GQ913818	humpback_F287	0	species
KM894292	murre_P34	4	order		KT247766	rockfish_R344	1	genus		GQ913819	humpback_P362	0	species
KM894293	murre_F9	2	order		KT247766	rockfish_P294	3	genus		GQ913819	humpback_F287	0	species
KM894293	murre_R138	3	order		KT247766	rockfish_F169	0	genus		GQ913819	humpback_R437	0	species
KM894293	murre_P34	4	order		KT247767	rockfish_F169	0	genus		GQ913820	humpback_R437	0	species
KM894294	murre_F9	2	order		KT247767	rockfish_P294	3	genus		GQ913820	humpback_P362	0	species
KM894294	murre_R138	3	order		KT247767	rockfish_R344	1	genus		GQ913820	humpback_F287	0	species
KM894294	murre_P34	4	order		KT247768	rockfish_P294	3	genus		GQ913821	humpback_R437	0	species
KP243177	murre_R138	5	order		KT247768	rockfish_R344	1	genus		GQ913821	humpback_F287	0	species
KP243178	murre_R138	5	order		KT247768	rockfish_F169	0	genus		GQ913821	humpback_P362	1	species
KP243179	murre_R138	5	order		KT247769	rockfish_P294	3	genus		GQ913822	humpback_R437	0	species
KP243180	murre_R138	5	order		KT247769	rockfish_R344	1	genus		GQ913822	humpback_P362	0	species
KP243181	murre_R138	5	order		KT247769	rockfish_F169	0	genus		GQ913822	humpback_F287	0	species
KP243182	murre_R138	5	order		KT247770	rockfish_P294	3	genus		GQ913823	humpback_R437	0	species
KP243183	murre_R138	5	order		KT247770	rockfish_R344	1	genus		GQ913823	humpback_P362	0	species
KP243184	murre_R138	5	order		KT247770	rockfish_F169	0	genus		GQ913823	humpback_F287	0	species
KP243185	murre_R138	5	order		KT247771	rockfish_R344	1	genus		GQ913824	humpback_R437	0	species
KP243186	murre_R138	2	order		KT247771	rockfish_P294	3	genus		GQ913824	humpback_P362	0	species
KP243187	murre_R138	2	order		KT247771	rockfish_F169	0	genus		GQ913824	humpback_F287	0	species
KP243188	murre_R138	2	order		KT247772	rockfish_R344	1	genus		GQ913825	humpback_R437	0	species
KP243189	murre_R138	2	order		KT247772	rockfish_P294	3	genus		GQ913825	humpback_P362	1	species
KP243190	murre_R138	2	order		KT247772	rockfish_F169	0	genus		GQ913825	humpback_F287	0	species
KP243191	murre_R138	2	order		KT247773	rockfish_R344	1	genus		GQ913826	humpback_R437	0	species
KP252190	murre_F9	3	order		KT247773	rockfish_P294	3	genus		GQ913826	humpback_P362	0	species
KP252190	murre_R138	1	order		KT247773	rockfish_F169	0	genus		GQ913826	humpback_F287	0	species
KP252190	murre_P34	4	order		KT247774	rockfish_P294	3	genus		GQ913827	humpback_R437	0	species
KP252191	murre_F9	3	order		KT247774	rockfish_R344	2	genus		GQ913827	humpback_P362	0	species
KP252191	murre_R138	3	order		KT247774	rockfish_F169	0	genus		GQ913827	humpback_F287	0	species
KP252191	murre_P34	4	order		KT247775	rockfish_P294	3	genus		GQ913828	humpback_R437	0	species
KP252206	murre_R138	4	order		KT247775	rockfish_R344	1	genus		GQ913828	humpback_P362	0	species
KP252206	murre_F9	4	order		KT247775	rockfish_F169	0	genus		GQ913828	humpback_F287	0	species
KP252206	murre_P34	4	order		KT247776	rockfish_P294	3	genus		GQ913829	humpback_R437	0	species
KP975242	murre_R138	3	order		KT247776	rockfish_F169	0	genus		GQ913829	humpback_P362	0	species
KP975242	murre_P34	5	order		KT247776	rockfish_R344	1	genus		GQ913829	humpback_F287	0	species
KP975243	murre_R138	3	order		KT247777	rockfish_P294	3	genus		GQ913830	humpback_R437	0	species
KP975243	murre_P34	5	order		KT247777	rockfish_R344	1	genus		GQ913830	humpback_F287	0	species
KP975255	murre_R138	3	order		KT247777	rockfish_F169	0	genus		GQ913830	humpback_P362	0	species
KP975255	murre_P34	5	order		KT247779	rockfish_P294	3	genus		GQ913831	humpback_R437	0	species
KT803623	murre_P34	4	order		KT247779	rockfish_R344	1	genus		GQ913831	humpback_F287	0	species
KT803623	murre_R138	2	order		KT247779	rockfish_F169	0	genus		GQ913831	humpback_P362	0	species
KT803623	murre_F9	4	order		KT247780	rockfish_P294	3	genus		GQ913832	humpback_P362	0	species
KU374350	murre_R138	2	order		KT247780	rockfish_R344	1	genus		GQ913832	humpback_F287	0	species
KU374350	murre_F9	1	order		KT247780	rockfish_F169	0	genus		GQ913832	humpback_R437	0	species
KU374350	murre_P34	3	order		KT247781	rockfish_P294	3	genus		GQ913833	humpback_R437	0	species
KU722401	murre_R138	1	order		KT247781	rockfish_R344	1	genus		GQ913833	humpback_P362	0	species
KU722401	murre_F9	0	order		KT247781	rockfish_F169	0	genus		GQ913833	humpback_F287	0	species
KU722401	murre_P34	4	order		KT247782	rockfish_P294	3	genus		GQ913834	humpback_R437	0	species
KU722405	murre_R138	3	order		KT247782	rockfish_R344	2	genus		GQ913834	humpback_P362	0	species
KU722405	murre_F9	2	order		KT247782	rockfish_F169	0	genus		GQ913834	humpback_F287	0	species
KU722405	murre_P34	5	order		KT247783	rockfish_F169	0	genus		GQ913835	humpback_P362	1	species
KU722406	murre_R138	3	order		KT247783	rockfish_P294	3	genus		GQ913835	humpback_F287	0	species
KU722406	murre_F9	2	order		KT247783	rockfish_R344	2	genus		GQ913835	humpback_R437	0	species
KU722406	murre_P34	5	order		KT247784	rockfish_P294	3	genus		GQ913836	humpback_R437	0	species
KU722408	murre_R138	2	order		KT247784	rockfish_F169	0	genus		GQ913836	humpback_F287	0	species
KU722408	murre_F9	0	order		KT247784	rockfish_R344	1	genus		GQ913836	humpback_P362	0	species
KU722408	murre_P34	4	order		KT247785	rockfish_P294	3	genus		GQ913837	humpback_R437	0	species
KU722412	murre_R138	0	order		KT247785	rockfish_R344	2	genus		GQ913837	humpback_P362	0	species
KU722412	murre_F9	2	order		KT247785	rockfish_F169	0	genus		GQ913837	humpback_F287	0	species
KU722412	murre_P34	5	order		KT247787	rockfish_P294	3	genus		GQ913838	humpback_R437	0	species
KU722424	murre_R138	0	order		KT247787	rockfish_R344	2	genus		GQ913838	humpback_P362	1	species
KU722424	murre_F9	2	order		KT247787	rockfish_F169	0	genus		GQ913838	humpback_F287	0	species
KU722424	murre_P34	5	order		KT247788	rockfish_P294	3	genus		GQ913839	humpback_R437	0	species
KU722445	murre_R138	3	order		KT247788	rockfish_F169	0	genus		GQ913839	humpback_P362	0	species
KU722445	murre_F9	2	order		KT247788	rockfish_R344	2	genus		GQ913839	humpback_F287	0	species
KU722445	murre_P34	5	order		KT247789	rockfish_P294	3	genus		GQ913840	humpback_F287	0	species
KU722446	murre_R138	3	order		KT247789	rockfish_R344	2	genus		GQ913840	humpback_P362	1	species
KU722446	murre_F9	2	order		KT247789	rockfish_F169	0	genus		GQ913841	humpback_R437	0	species
KU722446	murre_P34	5	order		KT247790	rockfish_P294	3	genus		GQ913841	humpback_F287	0	species
KU722447	murre_R138	3	order		KT247790	rockfish_F169	0	genus		GQ913841	humpback_P362	0	species
KU722447	murre_F9	2	order		KT247790	rockfish_R344	1	genus		GQ913842	humpback_R437	0	species
KU722447	murre_P34	5	order		KT247791	rockfish_P294	3	genus		GQ913842	humpback_F287	0	species
KU722450	murre_P34	5	order		KT247791	rockfish_R344	2	genus		GQ913842	humpback_P362	1	species
KU722450	murre_R138	3	order		KT247791	rockfish_F169	0	genus		GQ913843	humpback_R437	0	species
KU722454	murre_R138	4	order		KT247792	rockfish_P294	3	genus		GQ913843	humpback_P362	0	species
KU722454	murre_F9	1	order		KT247792	rockfish_F169	0	genus		GQ913843	humpback_F287	0	species
KU722454	murre_P34	5	order		KT247792	rockfish_R344	2	genus		GQ913844	humpback_F287	0	species
KU722458	murre_R138	1	order		KT247793	rockfish_P294	3	genus		GQ913844	humpback_R437	0	species
KU722458	murre_F9	0	order		KT247793	rockfish_R344	2	genus		GQ913844	humpback_P362	0	species
KU722458	murre_P34	4	order		KT247793	rockfish_F169	0	genus		GQ913845	humpback_R437	0	species
KU722467	murre_R138	2	order		KT247794	rockfish_P294	3	genus		GQ913845	humpback_F287	0	species
KU722467	murre_F9	3	order		KT247794	rockfish_R344	1	genus		GQ913845	humpback_P362	0	species
KU722467	murre_P34	4	order		KT247794	rockfish_F169	0	genus		GQ913846	humpback_R437	0	species
KU722475	murre_R138	3	order		KT247795	rockfish_P294	3	genus		GQ913846	humpback_F287	0	species
KU722475	murre_F9	2	order		KT247795	rockfish_R344	2	genus		GQ913846	humpback_P362	0	species
KU722475	murre_P34	5	order		KT247795	rockfish_F169	0	genus		GQ913847	humpback_R437	0	species
KU722480	murre_R138	0	order		KT247796	rockfish_P294	3	genus		GQ913847	humpback_F287	0	species
KU722480	murre_F9	2	order		KT247796	rockfish_R344	2	genus		GQ913847	humpback_P362	0	species
KU722480	murre_P34	5	order		KT247796	rockfish_F169	0	genus		GQ913848	humpback_R437	0	species
KU722486	murre_R138	1	order		KT247797	rockfish_P294	3	genus		GQ913848	humpback_F287	0	species
KU722486	murre_P34	5	order		KT247797	rockfish_F169	0	genus		GQ913848	humpback_P362	0	species
KU722486	murre_F9	1	order		KT247797	rockfish_R344	1	genus		GQ913849	humpback_R437	0	species
KU722492	murre_R138	3	order		KT247798	rockfish_P294	3	genus		GQ913849	humpback_P362	0	species
KU722492	murre_F9	2	order		KT247798	rockfish_R344	1	genus		GQ913849	humpback_F287	1	species
KU722492	murre_P34	5	order		KT247798	rockfish_F169	0	genus		GQ913850	humpback_P362	0	species
KU722516	murre_R138	3	order		KT247799	rockfish_P294	3	genus		GQ913850	humpback_F287	0	species
KU722516	murre_F9	2	order		KT247799	rockfish_R344	2	genus		GQ913851	humpback_R437	1	species
KU722516	murre_P34	5	order		KT247799	rockfish_F169	0	genus		GQ913851	humpback_P362	0	species
KU722520	murre_R138	1	order		KT247800	rockfish_P294	3	genus		GQ913851	humpback_F287	0	species
KU722520	murre_F9	1	order		KT247800	rockfish_R344	1	genus		GQ913852	humpback_R437	0	species
KU722520	murre_P34	5	order		KT247800	rockfish_F169	0	genus		GQ913852	humpback_F287	0	species
KU722528	murre_R138	3	order		KT247801	rockfish_P294	3	genus		GQ913852	humpback_P362	0	species
KU722528	murre_F9	2	order		KT247801	rockfish_F169	0	genus		HQ241479	humpback_F287	0	species
KU722528	murre_P34	3	order		KT247801	rockfish_R344	2	genus		HQ241479	humpback_P362	1	species
KU722535	murre_R138	2	order		KT247802	rockfish_F169	0	genus		HQ241479	humpback_R437	0	species
KU722535	murre_F9	3	order		KT247802	rockfish_P294	3	genus		HQ241480	humpback_F287	0	species
KU722535	murre_P34	4	order		KT247802	rockfish_R344	1	genus		HQ241480	humpback_P362	0	species
KU722536	murre_R138	1	order		KT247803	rockfish_R344	1	genus		HQ241480	humpback_R437	0	species
KU722536	murre_F9	0	order		KT247803	rockfish_P294	3	genus		HQ241481	humpback_F287	0	species
KU722536	murre_P34	4	order		KT247803	rockfish_F169	0	genus		HQ241481	humpback_P362	1	species
KX371149	murre_R138	4	order		KT247804	rockfish_P294	3	genus		HQ241481	humpback_R437	0	species
KX371149	murre_P34	2	order		KT247804	rockfish_F169	0	genus		HQ241482	humpback_F287	0	species
KX371150	murre_R138	4	order		KT247804	rockfish_R344	1	genus		HQ241482	humpback_P362	1	species
KX371150	murre_P34	5	order		KT247805	rockfish_R344	2	genus		HQ241482	humpback_R437	0	species
KX371151	murre_R138	4	order		KT247805	rockfish_F169	0	genus		HQ241483	humpback_F287	0	species
KX371151	murre_P34	5	order		KT247805	rockfish_P294	3	genus		HQ241483	humpback_P362	1	species
KX371152	murre_R138	4	order		KT247806	rockfish_P294	3	genus		HQ241483	humpback_R437	0	species
KX371152	murre_P34	5	order		KT247806	rockfish_F169	0	genus		HQ241484	humpback_F287	0	species
KX371153	murre_R138	4	order		KT247807	rockfish_R344	2	genus		HQ241484	humpback_P362	0	species
KX371153	murre_P34	5	order		KT247807	rockfish_P294	3	genus		HQ241484	humpback_R437	0	species
KX371154	murre_P34	5	order		KT247807	rockfish_F169	0	genus		HQ241485	humpback_F287	0	species
KX371154	murre_R138	4	order		KT247808	rockfish_P294	3	genus		HQ241485	humpback_P362	1	species
KX371155	murre_R138	4	order		KT247808	rockfish_F169	0	genus		HQ241485	humpback_R437	0	species
KX371155	murre_P34	5	order		KT247808	rockfish_R344	1	genus		HQ241486	humpback_F287	0	species
KX371156	murre_R138	4	order		KT247809	rockfish_P294	3	genus		HQ241486	humpback_P362	0	species
KX371156	murre_P34	5	order		KT247809	rockfish_R344	1	genus		HQ241486	humpback_R437	1	species
KX371157	murre_R138	4	order		KT247809	rockfish_F169	0	genus		KC795827	humpback_R437	0	species
KX371157	murre_P34	5	order		KT247810	rockfish_P294	3	genus		KC795827	humpback_F287	0	species
KX371158	murre_P34	5	order		KT247810	rockfish_R344	1	genus		KC795827	humpback_P362	0	species
KX371158	murre_R138	4	order		KT247810	rockfish_F169	0	genus		KC795828	humpback_R437	0	species
KX371159	murre_R138	4	order		KT247811	rockfish_R344	1	genus		KC795828	humpback_P362	1	species
KX371160	murre_R138	4	order		KT247811	rockfish_P294	3	genus		KC795828	humpback_F287	0	species
KX371160	murre_P34	5	order		KT247811	rockfish_F169	0	genus		KC795829	humpback_P362	0	species
KX371161	murre_R138	4	order		KT247812	rockfish_R344	1	genus		KC795829	humpback_F287	0	species
KX371161	murre_P34	5	order		KT247812	rockfish_P294	3	genus		KC795829	humpback_R437	0	species
KX371162	murre_R138	4	order		KT247812	rockfish_F169	0	genus		KC795830	humpback_F287	0	species
KX371162	murre_P34	5	order		KT247813	rockfish_P294	3	genus		KC795830	humpback_P362	0	species
KX371163	murre_R138	4	order		KT247813	rockfish_F169	0	genus		KC795830	humpback_R437	0	species
KX371163	murre_P34	5	order		KT247813	rockfish_R344	1	genus		KC795831	humpback_F287	0	species
KX371164	murre_R138	4	order		KT247814	rockfish_P294	3	genus		KC795831	humpback_R437	0	species
KX371164	murre_P34	5	order		KT247814	rockfish_F169	0	genus		KC795831	humpback_P362	0	species
KX371165	murre_R138	4	order		KT247814	rockfish_R344	1	genus		KC795832	humpback_R437	0	species
KX371165	murre_P34	5	order		KT247815	rockfish_R344	1	genus		KC795832	humpback_P362	1	species
KX371166	murre_R138	3	order		KT247815	rockfish_P294	3	genus		KC795832	humpback_F287	0	species
KX371166	murre_P34	5	order		KT247815	rockfish_F169	0	genus		KC795833	humpback_F287	0	species
KX371167	murre_R138	3	order		KT247816	rockfish_R344	1	genus		KC795833	humpback_R437	0	species
KX371167	murre_P34	5	order		KT247816	rockfish_P294	3	genus		KC795833	humpback_P362	1	species
KX371168	murre_R138	3	order		KT247816	rockfish_F169	0	genus		KC795834	humpback_R437	0	species
KX371168	murre_P34	5	order		KT247817	rockfish_R344	1	genus		KC795834	humpback_F287	0	species
KY661875	murre_F9	2	order		KT247817	rockfish_P294	3	genus		KC795834	humpback_P362	0	species
KY661875	murre_R138	2	order		KT247817	rockfish_F169	0	genus		KC795835	humpback_P362	1	species
KY661875	murre_P34	4	order		KT247818	rockfish_P294	3	genus		KC795835	humpback_F287	0	species
KY754494	murre_F9	2	order		KT247818	rockfish_F169	0	genus		KC795835	humpback_R437	0	species
KY754494	murre_R138	2	order		KT247818	rockfish_R344	1	genus		KC795836	humpback_R437	0	species
KY754494	murre_P34	4	order		KT247819	rockfish_P294	3	genus		KC795836	humpback_F287	0	species
MF580161	murre_P34	4	order		KT247819	rockfish_F169	0	genus		KC795836	humpback_P362	0	species
MF580161	murre_F9	3	order		KT247819	rockfish_R344	1	genus		KC795837	humpback_R437	0	species
MF580161	murre_R138	1	order		KT247820	rockfish_P294	3	genus		KC795837	humpback_P362	0	species
MF580169	murre_P34	5	order		KT247820	rockfish_R344	1	genus		KC795837	humpback_F287	1	species
MF580169	murre_F9	2	order		KT247820	rockfish_F169	0	genus		KC795838	humpback_P362	0	species
MF580169	murre_R138	3	order		KT247821	rockfish_R344	1	genus		KC795838	humpback_F287	0	species
MF580171	murre_P34	2	order		KT247821	rockfish_P294	3	genus		KC795838	humpback_R437	0	species
MF580171	murre_F9	4	order		KT247821	rockfish_F169	0	genus		KC795839	humpback_R437	0	species
MF580171	murre_R138	1	order		KT247822	rockfish_P294	2	genus		KC795839	humpback_P362	1	species
MF580176	murre_P34	4	order		KT247822	rockfish_R344	1	genus		KC795839	humpback_F287	0	species
MF580176	murre_F9	2	order		KT247822	rockfish_F169	1	genus		KC795840	humpback_F287	0	species
MF580176	murre_R138	3	order		KT247823	rockfish_P294	3	genus		KC795840	humpback_R437	0	species
MF580195	murre_P34	4	order		KT247823	rockfish_F169	0	genus		KC795840	humpback_P362	0	species
MF580195	murre_F9	3	order		KT247823	rockfish_R344	1	genus		KC795841	humpback_R437	0	species
MF580195	murre_R138	1	order		KX119496	rockfish_P294	3	genus		KC795841	humpback_F287	0	species
MF580215	murre_P34	5	order		KX119496	rockfish_F169	0	genus		KC795841	humpback_P362	0	species
MF580215	murre_F9	1	order		KX119496	rockfish_R344	1	genus		KC795842	humpback_F287	0	species
MF580215	murre_R138	3	order		KX119497	rockfish_P294	3	genus		KC795842	humpback_P362	0	species
MF580219	murre_P34	4	order		KX119497	rockfish_F169	0	genus		KC795842	humpback_R437	0	species
MF580219	murre_F9	4	order		KX119497	rockfish_R344	1	genus		KC795843	humpback_R437	0	species
MF580219	murre_R138	4	order		KX119498	rockfish_P294	3	genus		KC795843	humpback_P362	2	species
MG972449	murre_R138	4	order		KX119498	rockfish_F169	0	genus		KC795843	humpback_F287	0	species
MG972449	murre_P34	5	order		KX119498	rockfish_R344	1	genus		KC795844	humpback_R437	0	species
MG972450	murre_R138	4	order		KX119499	rockfish_P294	3	genus		KC795844	humpback_F287	0	species
MG972450	murre_P34	5	order		KX119499	rockfish_F169	0	genus		KC795844	humpback_P362	0	species
MK261806	murre_P34	4	order		KX119499	rockfish_R344	1	genus		KF477244	humpback_P362	0	species
MK261806	murre_R138	2	order		KX119500	rockfish_P294	3	genus		KF477244	humpback_F287	0	species
MK261806	murre_F9	2	order		KX119500	rockfish_F169	0	genus		KF477244	humpback_R437	0	species
MK261879	murre_P34	4	order		KX119500	rockfish_R344	1	genus		KF477245	humpback_P362	0	species
MK261879	murre_R138	2	order		KY570364	rockfish_R344	1	genus		KF477245	humpback_F287	0	species
MK261879	murre_F9	2	order		KY570364	rockfish_P294	3	genus		KF477245	humpback_R437	0	species
MK261953	murre_P34	5	order		KY570364	rockfish_F169	0	genus		KF477246	humpback_P362	0	species
MK261953	murre_R138	3	order		KY570365	rockfish_R344	1	genus		KF477246	humpback_F287	0	species
MK261953	murre_F9	1	order		KY570365	rockfish_P294	3	genus		KF477246	humpback_R437	0	species
MK261980	murre_P34	4	order		KY570365	rockfish_F169	0	genus		KF477247	humpback_P362	0	species
MK261980	murre_R138	1	order		KY570366	rockfish_R344	1	genus		KF477247	humpback_F287	0	species
MK261980	murre_F9	2	order		KY570366	rockfish_P294	3	genus		KF477247	humpback_R437	0	species
MK261984	murre_P34	4	order		KY570366	rockfish_F169	0	genus		KF477248	humpback_P362	0	species
MK261984	murre_R138	0	order		KY570367	rockfish_P294	3	genus		KF477248	humpback_F287	0	species
MK261984	murre_F9	1	order		KY570367	rockfish_R344	1	genus		KF477248	humpback_R437	0	species
MK261989	murre_P34	4	order		KY570367	rockfish_F169	0	genus		KF477249	humpback_P362	0	species
MK261989	murre_R138	1	order		KY570368	rockfish_P294	3	genus		KF477249	humpback_F287	0	species
MK261989	murre_F9	2	order		KY570368	rockfish_R344	1	genus		KF477249	humpback_R437	0	species
MK262080	murre_R138	2	order		KY570368	rockfish_F169	0	genus		KF477250	humpback_P362	1	species
MK262080	murre_F9	2	order		KY570369	rockfish_P294	3	genus		KF477250	humpback_F287	0	species
MK262088	murre_P34	4	order		KY570369	rockfish_R344	1	genus		KF477250	humpback_R437	0	species
MK262088	murre_R138	1	order		KY570369	rockfish_F169	0	genus		KF477251	humpback_P362	0	species
MK262088	murre_F9	2	order		KY570370	rockfish_P294	3	genus		KF477251	humpback_F287	0	species
MK262140	murre_P34	4	order		KY570370	rockfish_F169	0	genus		KF477251	humpback_R437	0	species
MK262140	murre_R138	2	order		KY570370	rockfish_R344	1	genus		KF477252	humpback_P362	0	species
MK262140	murre_F9	2	order		KY570371	rockfish_R344	1	genus		KF477252	humpback_F287	0	species
MK262155	murre_P34	5	order		KY570371	rockfish_P294	3	genus		KF477252	humpback_R437	0	species
MK262155	murre_R138	2	order		KY570371	rockfish_F169	0	genus		KF477253	humpback_P362	0	species
MK262155	murre_F9	2	order		KY570372	rockfish_P294	3	genus		KF477253	humpback_F287	0	species
MK262216	murre_P34	4	order		KY570372	rockfish_R344	1	genus		KF477253	humpback_R437	0	species
MK262216	murre_R138	2	order		KY570372	rockfish_F169	0	genus		KF477254	humpback_P362	0	species
MK262216	murre_F9	2	order		KY570373	rockfish_P294	3	genus		KF477254	humpback_F287	0	species
MK262222	murre_P34	4	order		KY570373	rockfish_R344	1	genus		KF477254	humpback_R437	0	species
MK262222	murre_R138	2	order		KY570373	rockfish_F169	1	genus		KF477255	humpback_P362	1	species
MK262222	murre_F9	2	order		KY570374	rockfish_P294	3	genus		KF477255	humpback_F287	0	species
MK262224	murre_P34	1	order		KY570374	rockfish_R344	1	genus		KF477255	humpback_R437	0	species
MK262224	murre_R138	2	order		KY570374	rockfish_F169	1	genus		KF477256	humpback_P362	0	species
MK262224	murre_F9	2	order		KY570375	rockfish_R344	1	genus		KF477256	humpback_F287	0	species
MK262228	murre_P34	4	order		KY570375	rockfish_P294	3	genus		KF477256	humpback_R437	0	species
MK262228	murre_R138	1	order		KY570375	rockfish_F169	0	genus		KF477257	humpback_P362	0	species
MK262228	murre_F9	2	order		KY570376	rockfish_P294	3	genus		KF477257	humpback_F287	0	species
MK262241	murre_P34	4	order		KY570376	rockfish_R344	1	genus		KF477257	humpback_R437	0	species
MK262241	murre_R138	1	order		KY570376	rockfish_F169	0	genus		KF477258	humpback_P362	0	species
MK262241	murre_F9	2	order		KY570377	rockfish_R344	1	genus		KF477258	humpback_F287	0	species
MK262303	murre_P34	5	order		KY570377	rockfish_P294	3	genus		KF477258	humpback_R437	0	species
MK262303	murre_R138	3	order		KY570377	rockfish_F169	0	genus		KF477259	humpback_P362	0	species
MK262303	murre_F9	1	order		KY570378	rockfish_R344	1	genus		KF477259	humpback_F287	0	species
MK262342	murre_P34	4	order		KY570378	rockfish_P294	4	genus		KF477259	humpback_R437	0	species
MK262342	murre_R138	2	order		KY570378	rockfish_F169	0	genus		KF477260	humpback_P362	0	species
MK262342	murre_F9	2	order		KY570379	rockfish_P294	4	genus		KF477260	humpback_F287	0	species
MK262352	murre_P34	4	order		KY570379	rockfish_R344	1	genus		KF477260	humpback_R437	0	species
MK262352	murre_R138	2	order		KY570379	rockfish_F169	0	genus		KF477261	humpback_P362	0	species
MK262352	murre_F9	2	order		KY570380	rockfish_P294	4	genus		KF477261	humpback_F287	0	species
MK262367	murre_P34	4	order		KY570380	rockfish_R344	1	genus		KF477261	humpback_R437	0	species
MK262367	murre_R138	2	order		KY570380	rockfish_F169	0	genus		KF477262	humpback_P362	0	species
MK262367	murre_F9	2	order		KY570381	rockfish_P294	4	genus		KF477262	humpback_F287	0	species
MK262432	murre_P34	4	order		KY570381	rockfish_R344	1	genus		KF477262	humpback_R437	0	species
MK262432	murre_R138	1	order		KY570381	rockfish_F169	0	genus		KF477263	humpback_P362	0	species
MK262432	murre_F9	2	order		KY570382	rockfish_P294	4	genus		KF477263	humpback_F287	0	species
MK262494	murre_P34	4	order		KY570382	rockfish_R344	1	genus		KF477263	humpback_R437	0	species
MK262494	murre_R138	2	order		KY570382	rockfish_F169	0	genus		KF477264	humpback_P362	1	species
MK262494	murre_F9	2	order		KY570383	rockfish_R344	1	genus		KF477264	humpback_F287	0	species
MK262506	murre_P34	4	order		KY570383	rockfish_P294	3	genus		KF477264	humpback_R437	0	species
MK262506	murre_R138	2	order		KY570383	rockfish_F169	0	genus		KF477265	humpback_P362	0	species
MK262506	murre_F9	2	order		KY570384	rockfish_P294	3	genus		KF477265	humpback_F287	0	species
MK262552	murre_P34	4	order		KY570384	rockfish_F169	0	genus		KF477265	humpback_R437	0	species
MK262552	murre_R138	2	order		KY570384	rockfish_R344	1	genus		KF477266	humpback_P362	0	species
MK262552	murre_F9	2	order		KY570385	rockfish_P294	3	genus		KF477266	humpback_F287	0	species
MK262581	murre_P34	4	order		KY570385	rockfish_R344	1	genus		KF477266	humpback_R437	0	species
MK262581	murre_R138	3	order		KY570385	rockfish_F169	0	genus		KF477267	humpback_P362	0	species
MK262581	murre_F9	0	order		KY570386	rockfish_P294	3	genus		KF477267	humpback_F287	0	species
MK262617	murre_P34	5	order		KY570386	rockfish_R344	1	genus		KF477267	humpback_R437	0	species
MK262617	murre_R138	3	order		KY570386	rockfish_F169	0	genus		KF477268	humpback_P362	0	species
MK262617	murre_F9	1	order		KY570387	rockfish_P294	3	genus		KF477268	humpback_F287	0	species
MK262679	murre_P34	4	order		KY570387	rockfish_R344	1	genus		KF477268	humpback_R437	0	species
MK262679	murre_R138	2	order		KY570387	rockfish_F169	0	genus		KF477269	humpback_P362	0	species
MK262679	murre_F9	2	order		MF172799	rockfish_R344	1	genus		KF477269	humpback_F287	0	species
MK262697	murre_P34	4	order		MF172799	rockfish_P294	3	genus		KF477269	humpback_R437	0	species
MK262697	murre_R138	1	order		MF172799	rockfish_F169	0	genus		KF477270	humpback_P362	0	species
MK262697	murre_F9	0	order		MF172827	rockfish_F169	0	genus		KF477270	humpback_F287	0	species
AY074886	murre_P34	5	order		MF172827	rockfish_R344	2	genus		KF477270	humpback_R437	0	species
AY074886	murre_F9	5	order		MF172827	rockfish_P294	3	genus		KF477271	humpback_P362	0	species
AY074886	murre_F9	2	order		MF172829	rockfish_P294	3	genus		KF477271	humpback_F287	0	species
AY074886	murre_F9	5	order		MF172829	rockfish_R344	2	genus		KF477271	humpback_R437	0	species
AY074886	murre_R138	2	order		MF172829	rockfish_F169	0	genus		KF768654	humpback_R437	0	species
AY074886	murre_F9	5	order		MF172833	rockfish_F169	1	genus		KF768654	humpback_P362	0	species
AY074886	murre_F9	2	order		MF172833	rockfish_R344	1	genus		KF768654	humpback_F287	0	species
AY074886	murre_F9	5	order		MF172833	rockfish_P294	2	genus		KF768655	humpback_R437	0	species
AY074886	murre_P34	5	order		MF172840	rockfish_P294	3	genus		KF768655	humpback_P362	0	species
AY074886	murre_R138	2	order		MF172840	rockfish_F169	0	genus		KF768655	humpback_F287	0	species
AB843135	murre_R138	5	order		MF172840	rockfish_R344	1	genus		KJ586816	humpback_R437	0	species
AB843135	murre_F9	4	order		MF172843	rockfish_P294	3	genus		KJ586816	humpback_F287	0	species
AB843135	murre_P34	3	order		MF172843	rockfish_F169	0	genus		KJ586816	humpback_P362	0	species
AB843136	murre_R138	5	order		MF172843	rockfish_R344	1	genus		KJ865622	humpback_F287	0	species
AB843136	murre_P34	3	order		MF172870	rockfish_P294	3	genus		KJ865622	humpback_P362	0	species
AB843137	murre_P34	3	order		MF172870	rockfish_R344	1	genus		KJ865622	humpback_R437	0	species
AB843137	murre_R138	5	order		MF172870	rockfish_F169	0	genus		KJ865623	humpback_F287	0	species
AB843138	murre_P34	3	order		MF172871	rockfish_P294	3	genus		KJ865623	humpback_P362	1	species
AB843138	murre_R138	5	order		MF172871	rockfish_R344	1	genus		KJ865623	humpback_R437	0	species
AB843138	murre_F9	4	order		MF172871	rockfish_F169	0	genus		KJ865624	humpback_F287	0	species
AB843139	murre_R138	5	order		MF172872	rockfish_P294	3	genus		KJ865624	humpback_P362	0	species
AB843139	murre_P34	3	order		MF172872	rockfish_F169	0	genus		KJ865624	humpback_R437	0	species
AB843140	murre_R138	5	order		MF172872	rockfish_R344	1	genus		KJ865625	humpback_R437	0	species
AB843140	murre_P34	3	order		MF172873	rockfish_P294	3	genus		KJ865625	humpback_P362	0	species
AB843141	murre_R138	5	order		MF172873	rockfish_R344	1	genus		KJ865625	humpback_F287	0	species
AB843141	murre_P34	3	order		MF172873	rockfish_F169	0	genus		KJ865626	humpback_F287	0	species
AB843142	murre_R138	5	order		MF172874	rockfish_P294	3	genus		KJ865626	humpback_P362	0	species
AB843142	murre_F9	4	order		MF172874	rockfish_R344	1	genus		KJ865626	humpback_R437	0	species
AB843142	murre_P34	3	order		MF172874	rockfish_F169	0	genus		KJ865627	humpback_F287	0	species
AB843143	murre_R138	5	order		MF172875	rockfish_P294	3	genus		KJ865627	humpback_P362	1	species
AB843143	murre_P34	3	order		MF172875	rockfish_R344	1	genus		KJ865627	humpback_R437	0	species
AB843144	murre_P34	3	order		MF172875	rockfish_F169	0	genus		KJ865628	humpback_F287	0	species
AB843144	murre_R138	5	order		MF172876	rockfish_P294	3	genus		KJ865628	humpback_P362	1	species
AB843145	murre_P34	3	order		MF172876	rockfish_R344	1	genus		KJ865628	humpback_R437	0	species
AB843145	murre_R138	5	order		MF172876	rockfish_F169	0	genus		KJ865629	humpback_F287	0	species
AB843146	murre_R138	5	order		MF172878	rockfish_P294	3	genus		KJ865629	humpback_P362	1	species
AB843146	murre_P34	3	order		MF172878	rockfish_R344	1	genus		KJ865629	humpback_R437	0	species
AB843147	murre_P34	3	order		MF172878	rockfish_F169	0	genus		KJ865630	humpback_R437	0	species
AB843147	murre_R138	5	order		MF172901	rockfish_P294	3	genus		KJ865630	humpback_P362	0	species
AB843147	murre_F9	4	order		MF172901	rockfish_F169	0	genus		KJ865630	humpback_F287	0	species
AB843174	murre_P34	4	order		MF172901	rockfish_R344	1	genus		KJ865631	humpback_F287	0	species
AB843174	murre_R138	0	order		MF172907	rockfish_P294	4	genus		KJ865631	humpback_P362	1	species
AB843174	murre_F9	2	order		MF172907	rockfish_F169	0	genus		KJ865631	humpback_R437	0	species
AB843175	murre_R138	4	order		MF172907	rockfish_R344	1	genus		KJ865632	humpback_F287	0	species
AB843176	murre_R138	4	order		MF172909	rockfish_P294	3	genus		KJ865632	humpback_P362	1	species
AB843177	murre_R138	4	order		MF172909	rockfish_F169	0	genus		KJ865632	humpback_R437	0	species
AB843201	murre_R138	1	order		MF172909	rockfish_R344	1	genus		KJ865633	humpback_F287	0	species
AB843202	murre_P34	2	order		MG298935	rockfish_P294	3	genus		KJ865633	humpback_P362	0	species
AB843202	murre_R138	1	order		MG298935	rockfish_F169	0	genus		KJ865633	humpback_R437	0	species
AB843203	murre_R138	1	order		MG298935	rockfish_R344	1	genus		KJ865634	humpback_F287	0	species
AB843203	murre_F9	2	order		MK907431	rockfish_P294	3	genus		KJ865634	humpback_P362	0	species
AB843203	murre_P34	2	order		MK907431	rockfish_F169	0	genus		KJ865634	humpback_R437	0	species
AB843204	murre_P34	1	order		MK907431	rockfish_R344	1	genus		KJ865635	humpback_F287	0	species
AB843204	murre_F9	1	order		MK907433	rockfish_P294	4	genus		KJ865635	humpback_P362	1	species
AB843204	murre_R138	1	order		MK907433	rockfish_F169	0	genus		KJ865635	humpback_R437	0	species
AB843205	murre_F9	1	order		MK907433	rockfish_R344	1	genus		KJ865636	humpback_F287	1	species
AB843205	murre_P34	2	order		MK907470	rockfish_P294	3	genus		KJ865636	humpback_P362	0	species
AB843205	murre_R138	1	order		MK907470	rockfish_F169	0	genus		KJ865636	humpback_R437	0	species
AB843261	murre_R138	3	order		MK907470	rockfish_R344	1	genus		KJ865637	humpback_F287	0	species
AB843262	murre_R138	3	order		MK907481	rockfish_P294	4	genus		KJ865637	humpback_P362	0	species
AB843262	murre_F9	2	order		MK907481	rockfish_F169	0	genus		KJ865637	humpback_R437	0	species
AB843262	murre_P34	2	order		MK907481	rockfish_R344	1	genus		KJ865638	humpback_R437	0	species
AB843263	murre_R138	3	order		MK907489	rockfish_P294	3	genus		KJ865638	humpback_P362	0	species
AB843263	murre_F9	2	order		MK907489	rockfish_F169	0	genus		KJ865638	humpback_F287	0	species
AB843263	murre_P34	2	order		MK907489	rockfish_R344	1	genus		KJ865639	humpback_F287	0	species
AB843270	murre_P34	4	order		MK907490	rockfish_P294	3	genus		KJ865639	humpback_P362	1	species
AB843270	murre_R138	3	order		MK907490	rockfish_F169	0	genus		KJ865639	humpback_R437	0	species
AB843271	murre_R138	3	order		MK907490	rockfish_R344	1	genus		KJ865640	humpback_F287	0	species
AB843271	murre_P34	4	order		EF609457	rockfish_P294	4	genus		KJ865640	humpback_P362	1	species
AB843740	murre_R138	3	order		EF609457	rockfish_F169	1	genus		KJ865640	humpback_R437	0	species
AB843740	murre_F9	5	order		EF609457	rockfish_R344	1	genus		KJ865641	humpback_F287	0	species
AB843740	murre_P34	3	order		EU074587	rockfish_P294	3	genus		KJ865641	humpback_P362	0	species
AB843741	murre_R138	3	order		EU074587	rockfish_F169	0	genus		KJ865641	humpback_R437	0	species
AB843746	murre_R138	5	order		EU074587	rockfish_R344	0	genus		KJ865642	humpback_F287	0	species
AB843746	murre_F9	4	order		EU074588	rockfish_P294	3	genus		KJ865642	humpback_P362	0	species
AB843746	murre_P34	3	order		EU074588	rockfish_F169	0	genus		KJ865642	humpback_R437	0	species
AB843747	murre_R138	5	order		EU074588	rockfish_R344	0	genus		KJ865643	humpback_F287	0	species
AB843747	murre_F9	4	order		EU074589	rockfish_P294	3	genus		KJ865643	humpback_P362	1	species
AB843747	murre_P34	3	order		EU074589	rockfish_F169	0	genus		KJ865643	humpback_R437	0	species
AB843748	murre_P34	3	order		EU074589	rockfish_R344	0	genus		KJ865644	humpback_F287	0	species
AB843748	murre_R138	5	order		EU074590	rockfish_P294	3	genus		KJ865644	humpback_P362	1	species
AB843748	murre_F9	4	order		EU074590	rockfish_F169	0	genus		KJ865644	humpback_R437	0	species
AB843749	murre_P34	3	order		EU074590	rockfish_R344	0	genus		KJ865645	humpback_F287	0	species
AB843749	murre_R138	5	order		EU074591	rockfish_P294	3	genus		KJ865645	humpback_P362	1	species
AB843750	murre_F9	4	order		EU074591	rockfish_F169	0	genus		KJ865645	humpback_R437	0	species
AB843750	murre_R138	5	order		EU074591	rockfish_R344	0	genus		KJ865646	humpback_F287	0	species
AB843750	murre_P34	3	order		EU752190	rockfish_P294	4	genus		KJ865646	humpback_P362	0	species
AB843768	murre_P34	4	order		EU752190	rockfish_F169	1	genus		KJ865646	humpback_R437	0	species
AB843768	murre_R138	0	order		EU752190	rockfish_R344	1	genus		KJ865647	humpback_F287	0	species
AB843769	murre_R138	0	order		EU752191	rockfish_P294	4	genus		KJ865647	humpback_P362	1	species
AB843770	murre_P34	4	order		EU752191	rockfish_F169	1	genus		KJ865647	humpback_R437	0	species
AB843770	murre_R138	0	order		EU752191	rockfish_R344	1	genus		KJ865648	humpback_F287	0	species
AB843771	murre_F9	2	order		EU752192	rockfish_P294	4	genus		KJ865648	humpback_P362	1	species
AB843771	murre_R138	4	order		EU752192	rockfish_F169	1	genus		KJ865648	humpback_R437	0	species
AB843772	murre_F9	2	order		EU752192	rockfish_R344	1	genus		KJ865649	humpback_F287	0	species
AB843772	murre_R138	4	order		EU752193	rockfish_P294	4	genus		KJ865649	humpback_P362	1	species
AB843773	murre_F9	2	order		EU752193	rockfish_F169	1	genus		KJ865649	humpback_R437	0	species
AB843773	murre_R138	4	order		EU752193	rockfish_R344	1	genus		KJ865650	humpback_F287	0	species
AB843792	murre_P34	2	order		EU752194	rockfish_P294	4	genus		KJ865650	humpback_P362	0	species
AB843792	murre_F9	2	order		EU752194	rockfish_F169	1	genus		KJ865650	humpback_R437	0	species
AB843792	murre_R138	1	order		EU752194	rockfish_R344	1	genus		KJ865651	humpback_R437	0	species
AB843793	murre_P34	2	order		EU752195	rockfish_P294	3	genus		KJ865651	humpback_P362	0	species
AB843793	murre_R138	1	order		EU752195	rockfish_F169	0	genus		KJ865651	humpback_F287	0	species
AB843793	murre_F9	2	order		EU752195	rockfish_R344	1	genus		KJ865652	humpback_R437	0	species
AB843794	murre_F9	1	order		EU752196	rockfish_P294	3	genus		KJ865652	humpback_P362	0	species
AB843794	murre_P34	2	order		EU752196	rockfish_F169	0	genus		KJ865652	humpback_F287	0	species
AB843794	murre_R138	1	order		EU752196	rockfish_R344	3	genus		KJ865653	humpback_F287	0	species
AB843795	murre_P34	2	order		EU752197	rockfish_P294	3	genus		KJ865653	humpback_P362	0	species
AB843795	murre_R138	1	order		EU752197	rockfish_F169	0	genus		KJ865653	humpback_R437	0	species
AB843795	murre_F9	1	order		EU752197	rockfish_R344	3	genus		KJ865654	humpback_F287	0	species
AB843814	murre_F9	5	order		FJ158548	rockfish_P294	3	genus		KJ865654	humpback_P362	2	species
AB843814	murre_P34	4	order		FJ158548	rockfish_R344	1	genus		KJ865654	humpback_R437	0	species
AB843814	murre_R138	1	order		FJ158548	rockfish_F169	0	genus		KJ865655	humpback_F287	0	species
AB843814	murre_F9	4	order		FJ165246	rockfish_P294	4	genus		KJ865655	humpback_P362	1	species
[truncated: 12,406 more rows]
